# Supplementary material for: Metallopolymers in minutes via organocatalysis at room temperature
Source: Royal Society of Chemistry journal article supplement (doi:10.1039/d2py00747a), 2022-01-01
Supplement: d2py00747a1.pdf [file d2py00747a1.pdf]

## Electronic Supplementary Information

### **Metallopolymers in Minutes *via* Organocatalysis at Room Temperature**

*Kjersti G. Oberle,<sup>†</sup> Elizabeth L. Whitman,<sup>‡</sup> Charles S. Jolly,<sup>‡</sup> Katherine A. Webster,<sup>†</sup> Benjamin S. Marx,<sup>‡</sup> Christopher M. Howard,<sup>‡</sup> Clara A. Hanger,<sup>‡</sup> Erin E. Ramey,<sup>†</sup> Yutong Zou,<sup>†</sup> Jared C. Lowe,<sup>†</sup> Mark Turlington,<sup>‡</sup> and Christopher R. Turlington<sup>†\*</sup>*

<sup>†</sup>Hope College Department of Chemistry and Biochemistry, Holland, MI 49422, United States

<sup>‡</sup>Berry College Department of Chemistry and Biochemistry, Mount Berry, GA, 30149,  
United States

#### Contents

|                                                                        |    |
|------------------------------------------------------------------------|----|
| <b>I. Experimental Section</b> .....                                   | 2  |
| <b>A. Materials and Methods</b> .....                                  | 2  |
| <b>B. Synthesis of Monomers</b> .....                                  | 4  |
| <b>C. Screening Reactions</b> .....                                    | 8  |
| <b>D. Synthesis of Polymers/Diblocks and Mechanistic Studies</b> ..... | 9  |
| <b>E. References</b> .....                                             | 13 |
| <b>II. NMR Spectra from Synthesis of Monomers</b> .....                | 14 |
| <b>III. X-Ray Structure of Ferrocene Monomer 2</b> .....               | 32 |
| <b>IV. NMR and GPC Spectra of Polymers</b> .....                       | 52 |
| <b>A. Monomer Activation</b> .....                                     | 52 |
| <b>B. Homopolymers</b> .....                                           | 53 |
| <b>C. Diblock Copolymers</b> .....                                     | 57 |
| <b>V. NMR and GPC Spectra of Mechanistic Studies</b> .....             | 65 |
| <b>A. Chain Extension</b> .....                                        | 65 |
| <b>B. Conversion and Molecular Weight versus Time</b> .....            | 68 |

## I. Experimental Section

### A. Materials and Methods

All reactions were performed under an atmosphere of dry nitrogen using standard drybox and Schlenk techniques, unless noted otherwise. Dichloromethane for polymerization reactions was stirred over calcium hydride for three days under nitrogen, and then was transferred by vacuum distillation into a Chemglass air-free storage vessel with activated 3 Å molecular sieves. The dichloromethane was degassed over three cycles of freeze-pump-thaw and taken into the glovebox. Benzyl alcohol was purchased from Acros Organics and purified by flash chromatography on silica gel using ethyl acetate as the eluent. The ethyl acetate was removed on a rotary evaporator and the benzyl alcohol was transferred into a Chemglass air-free storage vessel with activated 3 Å molecular sieves. The benzyl alcohol was degassed over three cycles of freeze-pump-thaw and taken into the glovebox. 1,8-Diazabicyclo[5.4.0]undec-7-ene (DBU) was purchased from Millipore Sigma (puriss.,  $\geq 99.0\%$ , catalog number 33482) and taken into the glovebox unopened and transferred under the nitrogen atmosphere to a Chemglass air-free storage vessel with activated 3 Å molecular sieves. 1,3-diphenylurea (DPU) is commercially available but we synthesized it according to the literature.<sup>1</sup> The product was recrystallized from concentrated solution of ethyl acetate by layering hexane on top. The crystalline material was isolated by filtration, washed with hexane, dried under vacuum and then taken into the glovebox and stored under nitrogen. N'-[3,5-Bis(trifluoromethyl)phenyl]-N-cyclohexylthiourea (TU) was synthesized according to the literature,<sup>2</sup> and the thiourea catalyst was purified by flash chromatography on a silica gel column using 50/50 mixture of hexane and ethyl acetate as an eluent. The solvent was removed using rotary evaporator and the solid was dried under high vacuum at 40 °C overnight while stirring and then taken into the glovebox and stored under nitrogen. The cyclic carbonate monomer with a pendant benzyl group (benzyl 5-methyl-2-oxo-1,3-dioxane-5-carboxylate, Bn-TMC) was synthesized according to the literature.<sup>3,4</sup> The product was recrystallized from a concentrated solution of ethyl acetate by layering hexane on top. The crystalline material was isolated by filtration, washed with hexane, dried under vacuum, and then taken into the glovebox and stored under nitrogen. All other reagents were purchased and used as received.

Analytical thin-layer chromatography (TLC) was performed on 200 µm silica gel plates from Millipore Sigma. Visualization was accomplished via UV light, and/or the use of potassium permanganate followed by application of heat. Chromatography was performed using Silica Gel 60 (230-400 mesh) from Sorbent Technologies.

<sup>1</sup>H and <sup>13</sup>C NMR spectra were recorded on either a JEOL 400 MHz spectrometer or a Bruker Avance III 400 MHz spectrometer, and <sup>1</sup>H NMR and <sup>13</sup>C NMR chemical shifts were referenced to internal TMS standard set to 0 ppm or to residual <sup>1</sup>H or the <sup>13</sup>C of the deuterated solvents, respectively. NMR data are reported as follows: chemical shift, multiplicity (s = singlet, bs = broad singlet, d = doublet, t = triplet, q = quartet, quint = quintet, sext = sextet, m = multiplet, dd = doublet of doublets, dt = doublet of triplets, td = triplet of doublets, qd = quartet of doublets), integration, coupling constant (Hz).

All GPC samples were prepared using ~3 mg of sample per 1 mL of THF and were filtered through a 0.45 µm PTFE filter. THF was used as the mobile phase for all GPC instruments. The GPC-RI data (and the traces shown in Figure 1a of the article) were collected at Hope College on a Waters Alliance HPLC System (2695 Separation Module) equipped with Waters 5 µm Styragel columns (HR 4E, HR 3, HR 4, MW linear range 200 - 400,000 g/mol, plus a guard column, 0.300 mL/minute flow rate) equipped with a Waters 2414

RI detector. GPC-LS data were either collected externally on a Waters APC separations module outfitted with three Waters Acquity columns (XT 45, XT 200, and XT 450a, MW linear range 200 - 400,000 g/mol, 0.750 mL/minute flow rate) and a Malvern OMNISEC REVEAL detector (RI, PDA, Light scattering, and Viscometer), or were collected at UC Santa Barbara's Materials Research Laboratory on a Waters Alliance HPLC System (2695 Separation Module) equipped with an Agilent PLgel 5  $\mu$ m column (MiniMIX-D, 250 x 4.6 mm, MW linear range 200 - 400,000 g/mol, plus a guard column, 0.375 mL/minute flow rate) equipped with a Wyatt DAWN HELEOS-II MALS detector (laser 663.1 nm), a Wyatt Optilab rEX (RI) detector, a Wyatt ViscoStar detector, and a Waters 2996 Photodiode Array detector (PDA).

Elemental analyses were performed by Robertson Microлит Laboratories of Ledgewood, NJ. X-Ray Diffraction was completed at Purdue University on a Bruker Quest diffractometer with a fixed chi angle, a Mo K $\alpha$  wavelength ( $\lambda = 0.71073 \text{ \AA}$ ) sealed tube fine focus X-ray tube, single crystal curved graphite incident beam monochromator, and a Photon II area detector. The instrument is equipped with an Oxford Cryosystems low temperature device and examination and data collection were performed at 150 K. Complete crystallographic data, in CIF format, have been deposited with the Cambridge Crystallographic Data Centre. CCDC 2157240 contain the supplementary crystallographic data for this paper. These data can be obtained free of charge from The Cambridge Crystallographic Data Centre via [www.ccdc.cam.ac.uk/data\\_request/cif](http://www.ccdc.cam.ac.uk/data_request/cif). High resolution mass spectra were obtained from Vanderbilt University and were recorded on an Agilent 6540 UHD Accurate-Mass Q-ToF with the  $[M+Na]^+$  ion observed.

## B. Synthesis of Monomers

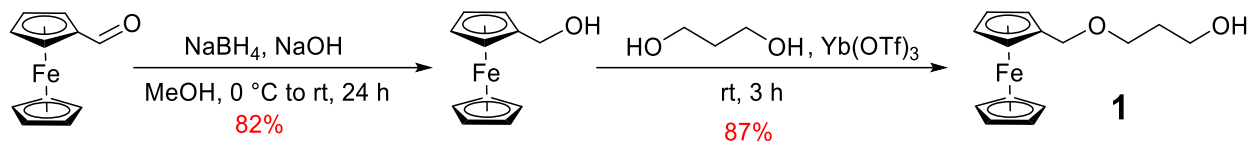

**Ferrocenemethanol:**<sup>5</sup> A solution of ferrocenecarboxaldehyde (2.00 g, 9.35 mmol, 1 equiv) in  $\text{MeOH}$  (93 mL) was cooled to  $0\text{ }^\circ\text{C}$ .  $\text{NaBH}_4$  (1.77 g, 46.73 mmol, 5 equiv) dissolved in a 2M aqueous solution of  $\text{NaOH}$  (56 mL) was then added. The reaction mixture was allowed to slowly warm to room temperature and stirred for 24 h.  $\text{MeOH}$  was then removed from the reaction mixture via rotary evaporation. The resulting aqueous solution was extracted with  $\text{Et}_2\text{O}$  (3 x 50 mL). The organic layer was washed with  $\text{H}_2\text{O}$  (2 x 50 mL), dried over  $\text{Na}_2\text{SO}_4$ , filtered through Celite, and concentrated via rotatory evaporation to afford the product as a light orange solid in 82% yield (1.66 g).  $R_f = 0.55$  (1:1 hexanes/ $\text{EtOAc}$ ). IR (neat,  $\text{cm}^{-1}$ ) 3230, 3089, 2933, 1379, 1235, 987.  $^1\text{H}$  NMR (400 MHz,  $\text{CDCl}_3$ )  $\delta$  4.32 (d, 2H,  $J = 4.6$  Hz), 4.23 (t, 2H,  $J = 1.8$  Hz), 4.17 (m, 7H), 1.69 (t, 1H,  $J = 5.1$  Hz).  $^{13}\text{C}\{^1\text{H}\}$  NMR (100 MHz,  $\text{CDCl}_3$ )  $\delta$  88.4, 68.42, 68.38, 68.0, 60.9. This data is in agreement with reported literature data.<sup>5</sup>

**3-(Ferrocenyloxy)propan-1-ol (**1**):**<sup>6</sup> Ferrocenemethanol (1.66 g, 7.64 mmol, 1 equiv) was dissolved in 1,3-propanediol (31 mL) under  $\text{N}_2$  atmosphere. Ytterbium triflate (236 mg, 0.38 mmol, 0.05 equiv) was added and the reaction was stirred at rt for 3 h at which time complete consumption of ferrocenemethanol was evident by TLC analysis. The reaction mixture was then diluted with  $\text{EtOAc}$  (70 mL), and the organic layer was then washed with  $\text{H}_2\text{O}$  (70 mL) and brine (70 mL). The organic layer was dried over  $\text{Na}_2\text{SO}_4$ , filtered and concentrated via rotary evaporation. The crude reaction mixture was purified via flash silica gel column chromatography (90:10 hexanes/ $\text{EtOAc}$  to 30:70 hexanes/ $\text{EtOAc}$ ) to obtain the product as an orange solid in 87% yield (2.13 g).  $R_f = 0.33$  (1:1 hexanes/ $\text{EtOAc}$ ). IR (neat,  $\text{cm}^{-1}$ ) 3413, 3082, 2957, 1356, 1231, 1059.  $^1\text{H}$  NMR (400 MHz,  $\text{CDCl}_3$ )  $\delta$  4.29 (s, 2H), 4.22 (t, 2H,  $J = 1.8$  Hz), 4.15 (t, 2H,  $J = 1.8$  Hz), 4.13 (s, 5H), 3.75 (q, 2H,  $J = 5.6$  Hz), 3.63 (t, 2H,  $J = 5.6$  Hz), 2.42 (t, 1H,  $J = 5.5$  Hz), 1.81 (quint, 2H,  $J = 5.5$  Hz).  $^{13}\text{C}\{^1\text{H}\}$  NMR (100 MHz,  $\text{CDCl}_3$ )  $\delta$  83.4, 69.5, 69.4, 69.2, 68.6, 62.3, 32.0. This data is in agreement with reported literature data.<sup>7</sup>

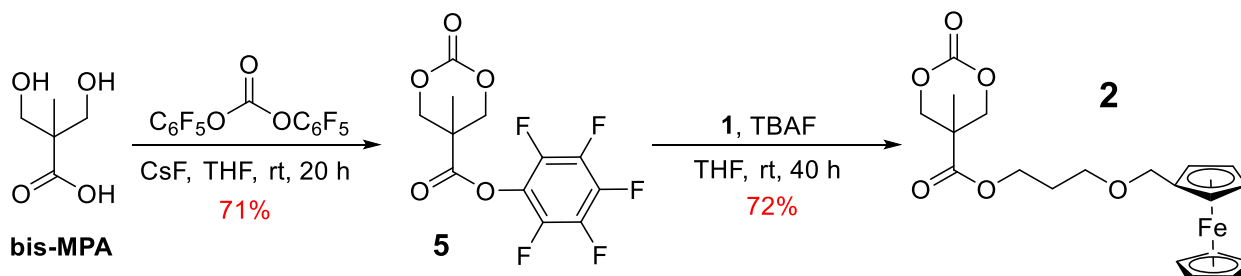

**Perfluorophenyl 5-methyl-2-oxo-1,3-dioxane-5-carboxylate (**5**):**<sup>8</sup> 2,2-bis(hydroxymethyl)propionic acid (bis-MPA) (1.5 g, 11.2 mmol, 1 equiv), bis(pentafluorophenyl)carbonate (11.02 g, 28.0 mmol, 2.5 equiv), and  $\text{CsF}$  (0.34 g, 2.24 mmol, 0.2 equiv) were dissolved in  $\text{THF}$  (35 mL) under  $\text{N}_2$  atmosphere. The reaction was stirred at rt for 20 h. The solvent was removed via rotary evaporation, and the resulting white solid was suspended in  $\text{CH}_2\text{Cl}_2$  (125 mL) and stirred for 15 min. The undissolved solid (pentafluorophenol) was removed via vacuum filtration. The filtrate was then washed with  $\text{NaHCO}_3$  (sat'd aqueous, 4 x 40 mL) and

brine (40 mL), dried over Na<sub>2</sub>SO<sub>4</sub>, and concentrated via rotary evaporation. The crude white solid was absorbed onto silica gel and purified via flash silica gel column chromatography (100% hexanes to 20:80 hexanes/EtOAc) to obtain the product as a white solid in 71% yield (2.60 g).  $R_f = 0.29$  (1:1 hexanes/EtOAc). IR (neat, cm<sup>-1</sup>) 2979, 1782, 1735, 1518, 1082, 992. <sup>1</sup>H NMR (400 MHz, CDCl<sub>3</sub>)  $\delta$  4.85 (d, 2H,  $J = 11.2$  Hz), 4.37 (d, 2H,  $J = 11.6$  Hz), 1.56 (s, 3H). <sup>13</sup>C{<sup>1</sup>H} NMR (100 MHz, CDCl<sub>3</sub>)  $\delta$  168.0, 146.9, 141.0 (m,  $J_{C-F} = 252.7$  Hz), 140.2 (dt,  $J_{C-F} = 255.1, 13.4, 3.8$  Hz), 138.0 (m,  $J_{C-F} = 257.3$  Hz), 124.4 (m), 72.5, 41.1, 17.5. This data is in agreement with reported literature data.<sup>8</sup>

**3-(Ferrocenyloxy)propyl 5-methyl-2-oxo-1,3-dioxane-5-carboxylate (2):** 3-(Ferrocenyloxy)propan-1-ol (**1**, 1.1 g, 4.01 mmol, 1 equiv) and perfluorophenyl 5-methyl-2-oxo-1,3-dioxane-5-carboxylate (**5**, 1.50 g, 4.61 mmol, 1.15 equiv) were dissolved in THF (6 mL) and stirred for 5 min to dissolve as much of the solids as possible. TBAF (1 M in THF, 0.80 mL, 0.80 mmol, 0.2 equiv) was added and the reaction was stirred at rt for 40 h. The crude reaction mixture was then absorbed onto silica gel and purified via flash silica gel column chromatography (100% hexanes to 50:50 hexanes/EtOAc) to obtain the product as an orange solid in 72% yield (1.21 g). Before use in polymerization reactions, the monomer was further purified by recrystallization. Approximately 80 mL of hexane was layered on top of a concentrated solution of 500 mg of the monomer in ethyl acetate (appx 8 mL). The mixture was filtered and washed with hexane. The non-crystalline solid was separated from the bright orange crystalline rods, and the crystalline rods were dried under high vacuum, yielding 400 mg (80% recovery). The bright orange, crystalline rods were suitable for X-ray diffraction.  $R_f = 0.28$  (1:1 hexanes/EtOAc). IR (neat, cm<sup>-1</sup>) 3084, 2960, 2854, 1753, 1730, 1465, 1337, 1237, 1180, 1089. <sup>1</sup>H NMR (400 MHz, CDCl<sub>3</sub>)  $\delta$  4.62 (d, 2H,  $J = 10.8$  Hz), 4.271 (t, 2H,  $J = 6.4$  Hz), 4.266 (s, 2H), 4.22 (t, 2H,  $J = 1.8$  Hz), 4.15 (d, 2H,  $J = 10.8$  Hz), 4.15 (t, 2H,  $J = 1.8$  Hz), 4.13 (s, 5H), 3.47 (t, 2H,  $J = 5.9$  Hz), 1.90 (quint, 2H,  $J = 6.4$  Hz), 1.29 (s, 3H). <sup>13</sup>C{<sup>1</sup>H} NMR (100 MHz, CDCl<sub>3</sub>)  $\delta$  171.1, 147.6, 83.2, 73.1, 69.6, 69.4, 68.7, 68.6, 65.8, 63.7, 40.2, 28.9, 17.7. Anal. Calcd (found) for FeC<sub>20</sub>H<sub>24</sub>O<sub>6</sub>: C, 57.71 (57.61); H, 5.81 (5.79); N, 0.00 (<0.10). Crystal Data for C<sub>62</sub>H<sub>39</sub>BClF<sub>30</sub>IrN<sub>2</sub>O ( $M = 1636.41$ ): monoclinic, space group P2/c (no. 13),  $a = 34.6729(18)$  Å,  $b = 5.8345(3)$  Å,  $c = 19.1590(10)$  Å,  $\beta = 106.030(2)^\circ$ ,  $V = 3725.1(3)$  Å<sup>3</sup>,  $Z = 8$ ,  $Z' = 2$ ,  $T = 150$  K,  $\mu(\text{MoK}\alpha) = 0.844$  mm<sup>-1</sup>,  $D_{\text{calc}} = 1.484$  g/mm<sup>3</sup>, 66968 reflections measured ( $1.83 \leq 2\theta \leq 37.09$ ), 16862 unique ( $R_{\text{int}} = 0.0385$ ) which were used in all calculations. The final  $R_1$  was 0.0417 ( $I > 2\sigma(I)$ ) and  $wR_2$  was 0.0941 (all data), with a goodness-of-fit on  $F^2 = 1.098$ .

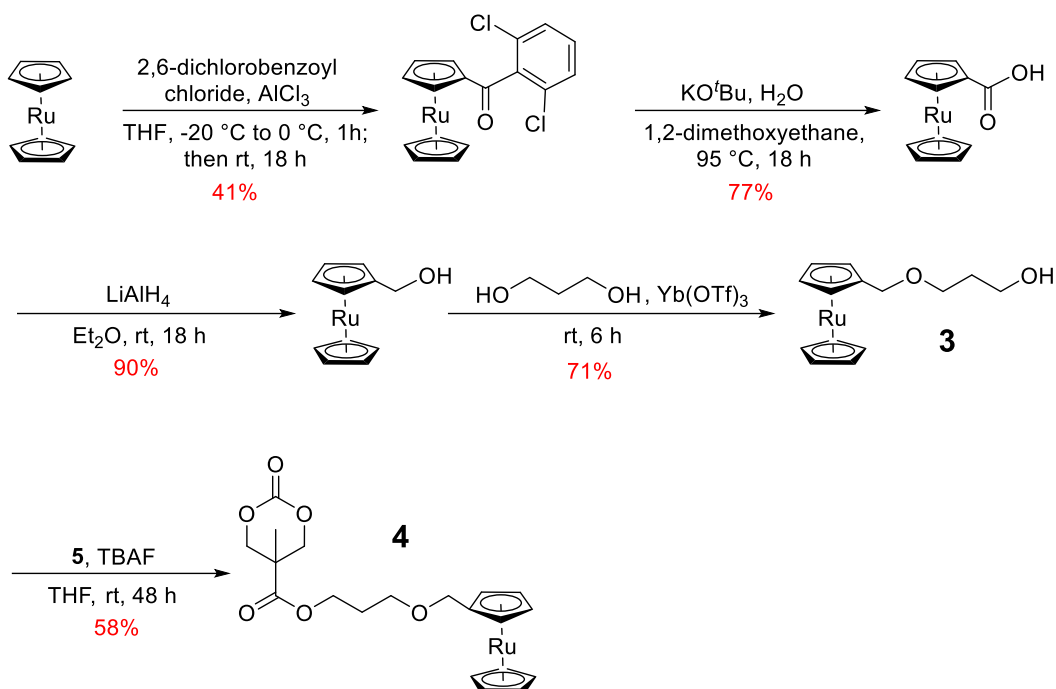

**2,6-Dichlorobenzoylruthenocene:**<sup>9</sup> Ruthenocene (1.173 g; 5.07 mmol; 1 equiv) was suspended in dry  $\text{CH}_2\text{Cl}_2$  (47 mL) under an  $\text{N}_2$  atmosphere, and 2,6-dichlorobenzoyl chloride (0.726 mL; 5.07 mmol; 1 equiv) was added. The mixture was cooled to  $-20\text{ }^\circ\text{C}$  and anhydrous  $\text{AlCl}_3$  (0.676 g; 5.07 mmol; 1 equiv) was added in one portion. The mixture was warmed to  $0\text{ }^\circ\text{C}$  over the course of 1 h, and then the cold bath was removed and the reaction was stirred at rt for 18 h. The mixture was then cooled to  $0\text{ }^\circ\text{C}$ ,  $\text{H}_2\text{O}$  (10 mL) was added, and the organic and aqueous layers were separated. The aqueous layer was extracted with  $\text{CH}_2\text{Cl}_2$  (3 x 15 mL). The organic layer was concentrated via rotary evaporation, redissolved in EtOAc (40 mL), and subsequently washed with  $\text{H}_2\text{O}$  (20 mL) and brine (20 mL). The organic layer was dried over  $\text{Na}_2\text{SO}_4$ , filtered, and concentrated via rotary evaporation. The crude product was purified via flash silica gel column chromatography (100% hexanes to 85:15 hexanes:EtOAc) to afford the product as a yellow solid in 41% yield (0.84 g).  $R_f = 0.39$  (9:1 hexanes:EtOAc). FTIR (neat,  $\text{cm}^{-1}$ ) 3286, 3088, 1646, 1285.  $^1\text{H}$  NMR (400 MHz,  $\text{CDCl}_3$ ):  $\delta$  7.33 (m, 2H), 7.27 (m, 1H), 4.98 (m, 2H), 4.82 (m, 2H), 4.67 (s, 5H).  $^{13}\text{C}$  NMR (100 MHz,  $\text{CDCl}_3$ ):  $\delta$  194.7, 138.3, 132.3, 130.5, 128.4, 84.1, 73.8, 72.9, 71.9. This data is in agreement with reported literature data.<sup>9</sup>

**Ruthenocencarboxylic Acid:**<sup>9</sup> 2,6-Dichlorobenzoylruthenocene (0.84 g; 2.07 mmol; 1 equiv) was dissolved in 1,2-dimethoxyethane (15.6 mL) and  $\text{KO}^t\text{Bu}$  (2.32 g; 20.7 mmol; 10 equiv) and  $\text{H}_2\text{O}$  (134  $\mu\text{L}$ ; 7.45 mmol; 3.6 equiv) were added. The flask was fitted with a reflux condenser and the mixture was stirred at  $95\text{ }^\circ\text{C}$  for 18 h under an  $\text{N}_2$  atmosphere. The mixture was then diluted with  $\text{H}_2\text{O}$  (15 mL), allowed to cool to rt, and then diluted with  $\text{Et}_2\text{O}$  (15 mL). The ruthenocene carboxylate was extracted into the aqueous layer using 1 M NaOH (2 x 10 mL). The combined aqueous layers were acidified with 1 M HCl, and the crude product was extracted into EtOAc (4 x 20 mL). The organic layer was dried over  $\text{Na}_2\text{SO}_4$ , filtered, and concentrated via rotary evaporation, affording the desired compound as a yellow solid in 77% yield (0.44 g) which was used without further purification.  $R_f = 0.24$  (1:1 hexanes:EtOAc). FTIR (neat,  $\text{cm}^{-1}$ ) 3100, 2971, 2561, 1656, 1477, 1288.  $^1\text{H}$  NMR ( $\text{DMSO}-d_6$ ):  $\delta$  12.08 (brs, 1H), 5.02 (t, 2H,  $J = 1.7\text{ Hz}$ ), 4.74

(t, 2H,  $J = 1.7$  Hz), 4.61 (s, 5H).  $^{13}\text{C}$  NMR (DMSO- $\text{D}_6$ ):  $\delta$  170.7, 76.3, 72.8, 71.6. This data is in agreement with reported literature data.<sup>9</sup>

**Hydroxymethylruthenocene:** The procedure was adapted from that reported by Ciampi and coworkers.<sup>10</sup> To a rapidly stirring suspension of  $\text{LiAlH}_4$  (0.42 g, 11.1 mmol) in dry  $\text{Et}_2\text{O}$  (17 mL) at rt was added a solution of ruthenocenecarboxylic acid (0.44 g, 1.6 mmol) in dry  $\text{Et}_2\text{O}$  (19 mL). Stirring was continued for 18 hours at rt under an  $\text{N}_2$  atmosphere. To the crude reaction mixture was added a 1:1  $\text{EtOH}:\text{H}_2\text{O}$  mixture (17 mL) in small portions to destroy excess  $\text{LiAlH}_4$ . Then, the reaction mixture was transferred to ice-cold 2 M  $\text{NaOH}$  (80 mL). The aqueous and organic phases were separated, and the aqueous layer was extracted with  $\text{Et}_2\text{O}$  ( $2 \times 15$  mL). The combined organic extracts were washed with 1 M  $\text{NaOH}$  solution ( $3 \times 15$  mL) and  $\text{H}_2\text{O}$  ( $3 \times 15$  mL), dried over  $\text{Na}_2\text{SO}_4$ , filtered through Celite, and concentrated via rotary evaporation. The crude reaction mixture was purified via flash silica gel column chromatography (100% hexanes to 60:40  $\text{EtOAc}:\text{hexanes}$ ) to afford the product in 90% yield (0.37 g).  $R_f = 0.62$  (1:1 hexanes: $\text{EtOAc}$ ). FTIR (neat,  $\text{cm}^{-1}$ ) 3218, 3091, 2868, 1667, 986.  $^1\text{H}$  NMR (400 MHz,  $\text{CDCl}_3$ )  $\delta$  4.67 (m, 2H), 4.62 (s, 5H), 4.56 (m, 2H), 4.01 (d, 2H,  $J = 5.5$  Hz), 1.13 (t, 2H,  $J = 5.5$  Hz);  $^{13}\text{C}$  NMR (100 MHz,  $\text{CDCl}_3$ )  $\delta$  95.5, 70.8, 70.5, 58.7. This data is in agreement with reported literature data.<sup>11</sup>

**3-(Ruthenocyloxy)propan-1-ol (3):** Hydroxymethylruthenocene (0.37 g, 1.42 mmol, 1 equiv) was dissolved in 1,3-propanediol (5.77 mL) and then ytterbium triflate (44 mg, 0.07 mmol, 0.05 equiv) was added. The reaction was stirred at rt for 6 h under an  $\text{N}_2$  atmosphere. The reaction mixture was then diluted with  $\text{EtOAc}$  (20 mL) and the organic layer was washed with  $\text{H}_2\text{O}$  (20 mL) and brine (20 mL). The organic layer was dried over  $\text{Na}_2\text{SO}_4$ , filtered and concentrated via rotary evaporation. The crude product was purified via flash silica gel column chromatography (100% hexanes to 70:30  $\text{EtOAc}:\text{hexanes}$ ) to afford the product in 71% yield (0.32 g).  $R_f = 0.46$  (1:1 hexanes: $\text{EtOAc}$ ). FTIR (neat,  $\text{cm}^{-1}$ ) 3360, 3094, 2856, 1655, 1232, 1073.  $^1\text{H}$  NMR (400 MHz,  $\text{CDCl}_3$ )  $\delta$ : 4.63 (m, 2H), 4.53 (s, 5H), 4.52 (m, 2H), 4.09 (s, 2H), 3.75 (t, 2H,  $J = 5.6$  Hz), 3.64 (t, 2H,  $J = 6.0$  Hz), 2.59 (brs, 1H), 1.82 (quintet, 2H,  $J = 5.6$  Hz);  $^{13}\text{C}$  NMR (100 MHz,  $\text{CDCl}_3$ )  $\delta$ : 86.8, 71.5, 70.6, 69.00, 68.97, 61.7, 32.0. HRMS (ESI+ /Q-TOF)  $m/z$ :  $[\text{M} + \text{Na}]^+$  calcd for  $\text{C}_{14}\text{H}_{18}\text{O}_2\text{Ru}$ , 343.0246; found, 343.0247.

**3-(Ruthenocyloxy)propyl 5-methyl-2-oxo-1,3-dioxane-5-carboxylate (4):** 3-(Ruthenocyloxy)propan-1-ol (**3**, 0.57 g, 1.78 mmol, 1 equiv) and perfluorophenyl-5-methyl-2-oxo-1,3-dioxane-5-carboxylate (**5**, 1.02 g, 3.12 mmol, 1.75 equiv) were dissolved in THF (3.2 mL) and stirred for 5 min to dissolve as much of the solids as possible. TBAF (1 M in THF, 0.53 mL, 0.53 mmol, 0.3 equiv) was added and the reaction was stirred at rt for 48 h under an  $\text{N}_2$  atmosphere. The crude reaction mixture was then absorbed onto silica gel and purified via flash silica gel column chromatography (100% hexanes to 70:30  $\text{EtOAc}:\text{hexanes}$ ) to afford the product in 58% yield (0.47 g). Before polymerization reactions, the monomer was further purified by recrystallization. Approximately 80 mL of hexane was layered on top of a concentrated solution of 501.2 mg of the monomer in ethyl acetate (appx 8 mL). The clear crystalline material was recovered by filtration, washed with hexane, and dried under high vacuum, yielding 399.0 mg (80% recovery).  $R_f = 0.29$  (1:1 hexanes: $\text{EtOAc}$ ). FTIR (neat,  $\text{cm}^{-1}$ ) 3081, 2911, 1756, 1729, 1460, 1236, 1169, 1082.  $^1\text{H}$  NMR (400 MHz,  $\text{CDCl}_3$ )  $\delta$ : 4.64 (m, 4 H), 4.52 (s, 7 H), 4.28 (t, 2H,  $J = 6.4$  Hz), 4.19 (d, 2 H,  $J = 10.4$  Hz), 4.05 (s, 2 H), 3.49 (t, 2 H,  $J = 6.0$  Hz), 1.91 (quint, 2 H,  $J = 6.2$  Hz), 1.29 (s, 3 H).  $^{13}\text{C}$  NMR (100 MHz,  $\text{CDCl}_3$ )  $\delta$ : 171.0, 147.5, 86.6, 73.0, 71.9, 70.7, 70.6, 68.9, 65.7, 63.6, 40.1, 28.8, 17.5. Anal. Calcd (found) for  $\text{RuC}_{20}\text{H}_{24}\text{O}_6$ : C, 52.05 (52.01); H, 5.24 (5.41); N, 0.00 (<0.10).

## C. Screening Reactions

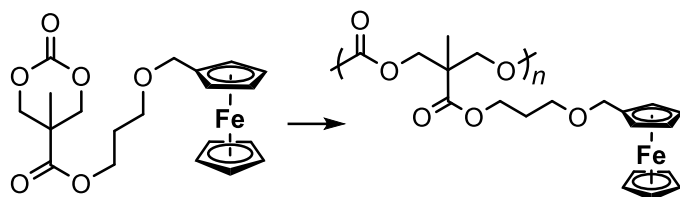

| Entry | Monomer | Co-Catalysts (%) | Monomer:<br>Initiator | Time (Conv) | $M_n$ ( $10^3$ )<br>GPC-RI | Dispersity  |
|-------|---------|------------------|-----------------------|-------------|----------------------------|-------------|
| S1    | 2       | TU(5%)/NHC(2%)   | 100:1                 | 3 h (9%)    | 4                          | 1.08        |
| S2    | 2       | TU(5%)/KH(2%)    | 100:1                 | 6 h (64%)   | 13                         | 1.24        |
| S3    | 2       | DPU(15%)/NHC(5%) | 100:1                 | 1 m (70%)   | 3 & 49                     | 1.48 & 1.22 |

**Table S1.** Homopolymerization screening reactions with ferrocene monomer **2** in dichloromethane, using benzyl alcohol as an initiator. Estimates for the molecular weights were determined in-house using GPC-RI calibrated to polystyrene standards. Entry S3 was a bimodal distribution. NHC = 1,3-di-*t*-butylimidazol-2-ylidene.

**The GPC-RI calibrated to polystyrene standards gave less-than-expected molecular weights for the metallopolymers.** For example, when the molecular weight of the polymer sample (Entry 3 in Table 1 in the communication) was analyzed by GPC-RI calibrated to polystyrene standards, it gave an  $M_n = 33,500$  and a dispersity of 1.09. This was much lower than the value determined by GPC-LS ( $M_n = 82,000$ , dispersity of 1.22). Similar observations of GPC-RI giving lower than expected molecular weights for metallopolymers with bulky pendant groups have been reported by others.<sup>12,13</sup> Accordingly, GPC-LS was utilized in all future experiments to accurately determine metallopolymer molecular weights.



## D. Synthesis of Polymers/Diblocks and Mechanistic Studies

**Table 1 Entry 1: Homopolymerization of Ferrocene Monomer 2 (Monomer:Initiator = 300:1) with TU.** In a 3 mL vial with a screw cap and PTFE septum in the glovebox, 3.0 mg (0.0081 mmol, 6 mole %) of 1-(3,5-bis(trifluoromethyl)-phenyl)-3-cyclohexyl-2-thiourea (TU) catalyst, 60.0 mg (0.14 mmol, 0.92 M) of ferrocene monomer **2**, 150  $\mu$ L of DCM, and 6.0  $\mu$ L of a benzyl alcohol initiator solution (0.080 M in DCM,  $4.8 \times 10^{-4}$  mmol benzyl alcohol) were added respectively. Once all the reagents dissolved, 1.2  $\mu$ L of 1,8-diazabicyclo[5.4.0]undec-7-ene (DBU, 0.0080 mmol, 6 mole %) was added to begin the polymerization. The reaction was stirred at room temperature for 1 hour, and then the sample was taken out of the glovebox and quenched with a drop of acetic acid. The solvent was blown off and the crude product was dried under high vacuum for 5 minutes. The sample was dissolved in *d*-chloroform and analyzed by  $^1\text{H}$  NMR spectroscopy to determine the percent conversion (89%). The solvent was blown off and the residue was dissolved in a minimal amount of THF, and the solution was added dropwise to 15 mL of vigorously stirring water chilled to 0  $^\circ\text{C}$  in a 20 mL tared scintillation vial. After the product precipitated, stirring was stopped and the purified product settled at the bottom of the vial. The water was decanted using a pipette or needle and syringe. Because the polymer sample was stuck to the stir bar, the purified sample was dissolved in a minimal amount of chloroform, the stir bar was removed, the solvent was blown off, and the product was dried under vacuum for 3-5 hours, yielding 49.0 mg (82%).  $^1\text{H}$  NMR (400 MHz,  $\text{CDCl}_3$ )  $\delta$  4.26-4.18 (m, 12H), 4.13 (s, 5H), 3.45 (m, 2H), 1.85 (m, 2H), 1.22 (s, 3H). GPC-LS (expected  $M_n = 111,139$ )  $M_n = 85,850$ ,  $M_w = 91,630$ ,  $D = 1.13$ .

**Table 1 Entry 2: Homopolymerization of Ferrocene Monomer 2 (Monomer:Initiator = 100:1).** In a 1.5 mL vial with a screw cap and PTFE septum in the glovebox, 0.6 mg (0.0028 mmol, 6 mole %) of 1,3-diphenylurea catalyst, 20.0 mg (0.048 mmol, 0.84 M) of ferrocene monomer **2**, 50.0  $\mu$ L of dichloromethane (DCM), and 6.0  $\mu$ L of a benzyl alcohol initiator solution (0.080 M in DCM,  $4.8 \times 10^{-4}$  mmol benzyl alcohol) were added respectively. Once all the reagents dissolved, 1.0  $\mu$ L of a DCM solution of catalyst DBU (1.4 M, 0.0014 mmol, 3 mole %) was added to begin the polymerization. The reaction was stirred at room temperature for 30 minutes, and then the sample was taken out of the glovebox and quenched with a drop of acetic acid. The solvent was blown off and the crude product was dried under high vacuum for 5 minutes. The sample was dissolved in *d*-chloroform and analyzed by  $^1\text{H}$  NMR spectroscopy to determine the percent conversion (87%). The equilibrium monomer concentration of **2** was calculated to be 0.12 M. The solvent was blown off, and the residue was dissolved in a minimal amount of THF and dialyzed against 400 mL of water in a 3.5 kD molecular weight cutoff dialysis bag. The product solution was transferred to a tared vial, and the dialysis bag was rinsed with 2 mL of chloroform and also added to the tared vial. The combined solvents were blown off and the product was dried under vacuum overnight, yielding 15.3 mg (77%).  $^1\text{H}$  NMR (400 MHz,  $\text{CDCl}_3$ )  $\delta$  4.26-4.18 (m, 10H), 4.13 (overlapping 2H and 5H singlets), 3.45 (m, 2H), 1.86 (m, 2H), 1.22 (s, 3H). GPC-LS (expected  $M_n = 36,213$ )  $M_n = 35,249$ ,  $M_w = 41,716$ ,  $D = 1.18$ .

**Table 1 Entry 3: Homopolymerization of Ferrocene Monomer 2 (Monomer:Initiator = 300:1).** In a 3 mL vial with a screw cap and PTFE septum in the glovebox, 1.8 mg (0.0085 mmol, 6 mole %) of 1,3-diphenylurea catalyst, 60.0 mg (0.14 mmol, 0.92 M) of ferrocene monomer **2**, 150  $\mu$ L of DCM, and 6.0  $\mu$ L of a benzyl alcohol initiator solution (0.080 M in DCM,  $4.8 \times 10^{-4}$  mmol benzyl alcohol) were added respectively. Once all the reagents dissolved, 0.6  $\mu$ L of DBU (0.0040 mmol, 3 mole %) was added to begin the polymerization. The reaction was stirred at room temperature for 30 minutes, and then the sample was

taken out of the glovebox and quenched with a drop of acetic acid. The solvent was blown off and the crude product was dried under high vacuum for 5 minutes. The sample was dissolved in *d*-chloroform and analyzed by <sup>1</sup>H NMR spectroscopy to determine the percent conversion (79%). The solvent was blown off and the residue was dissolved in a minimal amount of THF, and the solution was added dropwise to 15 mL of vigorously stirring water chilled to 0 °C in a 20 mL tared scintillation vial. After the product precipitated, stirring was stopped and the purified product settled at the bottom of the vial. The water was decanted using a pipette or needle and syringe. Because the polymer sample was stuck to the stir bar, the purified sample was dissolved in a minimal amount of chloroform, the stir bar was removed, the solvent was blown off, and the product was dried under vacuum for 3-5 hours, yielding 40.8 mg (68%). <sup>1</sup>H NMR (400 MHz, CDCl<sub>3</sub>) δ 4.28-4.15 (m, 12H), 4.13 (s, 5H), 3.45 (t, 2H), 1.85 (m, 2H), 1.22 (s, 3H). GPC-LS (expected  $M_n = 98,651$ )  $M_n = 81,560$ ,  $M_w = 80,490$ ,  $\mathcal{D} = 1.22$ .

**Table 1 Entry 4: Homopolymerization of Ruthenocene Monomer 4 (Monomer:Initiator = 90:1).** In a 1.5 mL vial with a screw cap and PTFE septum in the glovebox, 0.6 mg (0.0028 mmol, 7 mole %) of 1,3-diphenylurea catalyst, 20.4 mg (0.043 mmol, 0.76 *M*) of ruthenocene monomer **4**, 50 μL of DCM, and 6.0 μL of a benzyl alcohol initiator solution (0.080 *M* in DCM, 4.8 x10<sup>-4</sup> mmol benzyl alcohol) were added respectively. Once all the reagents dissolved, 1 μL of a DCM solution of catalyst DBU (1.4 *M*, 0.0014 mmol, 3 mole %) was added to begin the polymerization. The reaction was stirred at room temperature for 30 minutes, and then the sample was taken out of the glovebox and quenched with a drop of acetic acid. The solvent was blown off and the crude product was dried under high vacuum for 5 minutes. The sample was dissolved in *d*-chloroform and analyzed by <sup>1</sup>H NMR spectroscopy to determine the percent conversion (84%). The equilibrium monomer concentration was calculated to be 0.14 *M*. The solvent was blown off and the residue was dissolved in a minimal amount of THF. The sample was then dialyzed against 400 mL of water overnight at a 3.5 kD molecular weight cutoff. The product was transferred to a tared vial, the dialysis bag was rinsed with 2 mL of chloroform and added to the tared vial. The combined solvents were blown off and the product was dried under vacuum overnight, yielding 16.9 mg (85%). <sup>1</sup>H NMR (400 MHz, CDCl<sub>3</sub>) δ 4.64 (s, 2H), 4.52 (overlapping 2H and 5H singlets), 4.27-4.19 (m, 6H), 4.05 (s, 2H), 3.49 (m, 2H), 1.85 (m, 2H), 1.23 (s, 3H). GPC-LS (expected  $M_n = 34,903$ )  $M_n = 37,980$ ,  $M_w = 47,464$ ,  $\mathcal{D} = 1.25$ .

**Mechanistic experiments – Chain Extension with Ferrocene Monomer 2 (2:2:Initiator = 150:150:1).** In a 3 mL vial with a screw cap and PTFE septum in the glovebox, 0.6 mg (0.0028 mmol, 6 mole %) of 1,3-diphenylurea, 20.0 mg (0.048 mmol, 0.84 *M*) of ferrocene monomer **2**, 50 μL of DCM, and 4.0 μL of a benzyl alcohol initiator solution (0.080 *M* in DCM, 3.2 x10<sup>-4</sup> mmol benzyl alcohol) were added respectively. Once all the reagents dissolved, 1 μL of a DCM solution of catalyst DBU (1.4 *M*, 0.0014 mmol, 3 mole %) was added to begin the polymerization. The reaction was stirred at room temperature for 30 minutes, and then 50 μL of DCM was added to the solution. A 25 μL aliquot was taken out of the glovebox and quenched with a drop of acetic acid. The solvent was blown off and an <sup>1</sup>H NMR spectrum of the aliquot revealed 76% conversion of **2** to the polymer, and the aliquot was analyzed by GPC-LS (expected  $M_n = 47,481$ )  $M_n = 50,983$ ,  $M_w = 54,463$ ,  $\mathcal{D} = 1.07$ . The remaining reaction solution was immediately added to a 3 mL vial with a screw cap and PTFE septum with 20.0 mg (0.048 mmol) of ferrocene **2** monomer and stirred for an additional 30 minutes. The reaction was then taken out of the glovebox and quenched with a drop of acetic acid. The solvent was blown off and the product was dried under high vacuum for 5 minutes. The product was dissolved in *d*-chloroform and analyzed by <sup>1</sup>H NMR spectroscopy to determine the percent conversion

(67%).  $^1\text{H}$  NMR (400 MHz,  $\text{CDCl}_3$ )  $\delta$  4.28-4.16 (m, 12H), 4.13 (s, 5H), 3.45 (m, 2H), 1.87 (m, 2H), 1.22 (s, 3H). GPC-LS (expected  $M_n = 89,339$ )  $M_n = 106,972$ ,  $M_w = 115,872$ ,  $\mathcal{D} = 1.08$ .

**Mechanistic experiments – Percent Conversions and  $M_n$ 's with Ferrocene Monomer 2 (Monomer:Initiator = 300:1).** In a 1.5 mL vial with a screw cap and PTFE septum in the glovebox, 2.4 mg (0.011 mmol, 6 mole %) of 1,3-diphenylurea catalyst, 80.0 mg (0.19 mmol, 0.92  $M$ ) of ferrocene monomer **2**, 200.0  $\mu\text{L}$  of DCM, and 7.9  $\mu\text{L}$  of a benzyl alcohol initiator solution (0.080  $M$  in DCM,  $6.3 \times 10^{-4}$  mmol benzyl alcohol) were added respectively. Once all the reagents dissolved, 3.4  $\mu\text{L}$  of a DCM solution of catalyst DBU (1.4  $M$ , 0.0048 mmol, 3 mole %) was added to begin the polymerization. The reaction was stirred at room temperature for 30 minutes. Aliquots (25  $\mu\text{L}$  each) were taken and quenched with benzoic acid at 2, 4, 6, 8, 10, 15, 20, and 30 minutes. The solvent was blown off each aliquot and then they were dried under high vacuum for 5 minutes. The samples were dissolved in *d*-chloroform and analyzed by  $^1\text{H}$  NMR spectroscopy to determine the percent conversions. The samples were also analyzed by GPC-RI to determine molecular weight and dispersity.

**Table 2 Entry 5: Heterobimetallic Diblock Copolymerization of Ferrocene Monomer 2 and Ruthenocene Monomer 4 (2:4:Initiator=100:100:1).** In a 1.5 mL vial with a screw cap and PTFE septum in the glovebox, 0.7 mg (0.0033 mmol, 7 mole %) of 1,3-diphenylurea, 20.0 mg (0.048 mmol, 0.84  $M$ ) of ferrocene monomer **2**, 50  $\mu\text{L}$  of DCM, and 6.0  $\mu\text{L}$  of a benzyl alcohol initiator solution (0.080  $M$  in DCM,  $4.8 \times 10^{-4}$  mmol benzyl alcohol) were added respectively. Once all the reagents dissolved, 1.4  $\mu\text{L}$  of a DBU solution (1.4  $M$ , 0.0019 mmol, 4 mole %) was added to initiate the polymerization. The reaction was stirred at room temperature for 30 minutes. The reaction was transferred using a microliter syringe to a 1.5 mL vial containing 22.0 mg (0.048 mmol, 0.83  $M$ ) of ruthenocene monomer **4**. The reaction was stirred for an additional 30 minutes at room temperature. The sample was then quenched with acetic acid. The solvent was blown off and the crude product was dried under vacuum for 5 minutes. The sample was dissolved in *d*-chloroform and analyzed by  $^1\text{H}$  NMR spectroscopy to determine that percent conversion of **2** and **4** to polymer was 95% combined. The solvent was blown off and the residue was dissolved in a minimal amount of THF. The sample was then dialyzed against 400 mL of water overnight at a 3.5 kD molecular weight cutoff. The product transferred into a tared vial, the dialysis bag was rinsed with 2 mL of chloroform and added to the tared vial. The combined solvents were blown off and the product was dried under high vacuum for 3-5 hours, yielding 30.4 mg (72%).  $^1\text{H}$  NMR (400 MHz,  $\text{CDCl}_3$ )  $\delta$  4.63 (s, 2H), 4.52 (s, 7H), 4.26-4.20 (m, 12H), 4.13 (s, 5H), 4.05 (s, 2H), 3.47(m, 2H), 1.85(m, 2H), 1.23 (overlapping singlets, 3H).  $^{13}\text{C}$  NMR (100 MHz,  $\text{CDCl}_3$ )  $\delta$  172.1, 154.6, 86.9, 83.5, 72.0, 70.9, 70.8, 69.6, 69.4, 69.0, 68.8, 68.6, 66.0, 62.9, 46.7, 29.1, 17.6. GPC-LS (expected  $M_n = 83,356$ )  $M_n = 96,401$ ,  $M_w = 111,736$ ,  $\mathcal{D} = 1.16$ .

**Table 2 Entry 6: Diblock Copolymerization of Ruthenocene Monomer 4 and Bn-TMC (4:Bn-TMC:Initiator =145:200:1).** In a 1.5 mL vial with a screw cap and PTFE septum in the glovebox, 1.4 mg (0.0066 mmol, 9 mole %) of 1,3-diphenylurea catalyst, 32.1 mg (0.070 mmol, 1.2  $M$ ) of ruthenocene monomer **4**, 50  $\mu\text{L}$  of DCM, and 6.0  $\mu\text{L}$  of a benzyl alcohol initiator solution (0.080  $M$  in DCM,  $4.8 \times 10^{-4}$  mmol benzyl alcohol) were added respectively. Once all the reagents dissolved, 2.3  $\mu\text{L}$  of a DCM solution of catalyst DBU (1.4  $M$ , 0.0031 mmol, 4 mole %) was added to begin the polymerization. The reaction was stirred at room temperature for 30 minutes. An additional 50  $\mu\text{L}$  of DCM were added and the reaction stirred for a minute. The reaction was measured in a microliter syringe and a quarter of the reaction was taken for an aliquot. The aliquot was taken out of the glovebox and quenched with a drop acetic of acid. The solvent

was blown off and an  $^1\text{H}$  NMR spectrum of the aliquot revealed 90% conversion of **4** to polymer. The remaining three-quarters of the reaction was immediately added to a 1.5 mL vial with a screw cap and PTFE septum with 24.0 mg (0.096 mmol, 1.3 M) of **Bn-TMC** monomer. The reaction stirred at room temperature for an additional 30 minutes, and then the sample was taken out of the glovebox and quenched with a drop of acetic acid. The solvent was blown off and the product was dried under high vacuum for 5 minutes. The product was dissolved in *d*-chloroform and analyzed by  $^1\text{H}$  NMR spectroscopy to determine the percent conversion of the **Bn-TMC** monomer (91%). The solvent was blown off and the residue was dissolved in a minimal amount of THF. The product was then dialyzed against 400 mL of water overnight at a 3.5 kD molecular weight cutoff. The product was transferred into a tared vial and the dialysis bag was rinsed with 2 mL of chloroform and added to the tared vial. The combined solvents were blown off and the product was dried under vacuum for 3-5 hours, yielding 30.7 mg (55%).  $^1\text{H}$  NMR (400 MHz,  $\text{CDCl}_3$ )  $\delta$ . 7.31 (m, 6H), 5.12 (s, 2H), 4.64 (s, 2H), 4.53 (overlapping 2H and 5H singlets), 4.27-4.19 (m, 6H), 4.06 (s, 2H), 3.48 (m, 2H), 1.87 (m, 2H), 1.22 (overlapping singlets, 3H).  $^{13}\text{C}$  NMR (100 MHz,  $\text{CDCl}_3$ )  $\delta$  172.0, 154.6, 135.5, 128.7, 128.5, 128.1, 86.9, 72.0, 70.9, 70.8, 69.0, 68.7, 67.2, 66.0, 62.9, 46.7, 29.1, 17.6, 17.5. GPC-LS (expected  $M_n = 105,661$ )  $M_n = 92,707$ ,  $M_w = 104,765$ ,  $\mathcal{D} = 1.13$ .

**Table 2 Entry 7: Diblock Copolymerization of Bn-TMC and Ruthenocene Monomer 4 (Bn-TMC: 4:Initiator=200:145:1).** In a 1.5 mL vial with a screw cap and PTFE septum in the glovebox, 1.5 mg (0.0071 mmol, 7 mole %) of 1,3-diphenylurea catalyst, 26.0 mg (0.104 mmol, 1.9 M) of **Bn-TMC** monomer, 50  $\mu\text{L}$  of DCM, and 6.0  $\mu\text{L}$  of a benzyl alcohol initiator solution (0.080 M in DCM,  $4.8 \times 10^{-4}$  mmol benzyl alcohol) were added respectively. Once all the reagents dissolved, 2.2  $\mu\text{L}$  of a DCM solution of catalyst DBU (1.4 M, 0.0031 mmol, 3 mole %) was added to begin the polymerization. The reaction was stirred at room temperature for 30 minutes. An additional 50  $\mu\text{L}$  of DCM were added and the reaction stirred for a minute. The reaction was measured in a microliter syringe and a quarter of the reaction was taken for an aliquot. The aliquot was taken out of the glovebox and quenched with a drop of acetic acid. The solvent was blown off and an  $^1\text{H}$  NMR spectrum of the aliquot revealed 97% conversion of **Bn-TMC** to the polymer, and the aliquot was analyzed by GPC-LS (expected  $M_n = 48,549$ )  $M_n = 48,073$ ,  $M_w = 57,065$ ,  $\mathcal{D} = 1.19$ . The remaining three-quarters of the reaction was immediately added to a 1.5 mL vial with a screw cap and PTFE septum with 32.0 mg (0.069 mmol, 0.92 M) of ruthenocene monomer **4**. The reaction was stirred at room temperature for an additional 30 minutes, and then the sample was taken out of the glovebox and quenched with a drop of acetic acid. The solvent was blown off and the crude product was dried under high vacuum for 5 minutes. The product was dissolved in *d*-chloroform and analyzed by  $^1\text{H}$  NMR spectroscopy to determine the percent conversion of **4** (88%). The solvent was blown off and the residue was dissolved in a minimal amount of THF. The sample was then dialyzed against 400 mL of water overnight at a 3.5 kD molecular weight cutoff. The product was transferred to a tared vial and the dialysis bag was rinsed with 2 mL of chloroform and added to the tared vial. The combined solvents were blown off and the product was dried under vacuum for 3-5 hours, yielding 40.2 mg (69%).  $^1\text{H}$  NMR (400 MHz,  $\text{CDCl}_3$ )  $\delta$ . 7.30 (m, 6H), 5.12 (s, 2H), 4.63 (s, 2H), 4.52 (overlapping 2H and 5H singlets), 4.30-4.19 (m, 6H), 4.05 (s, 2H), 3.48 (m, 2H), 1.87 (m, 2H), 1.22 (overlapping singlets, 3H).  $^{13}\text{C}$  NMR (100 MHz,  $\text{CDCl}_3$ )  $\delta$  172.0, 154.5, 135.5, 128.7, 128.5, 128.1, 86.9, 72.0, 70.9, 70.8, 69.0, 68.7, 67.2, 66.0, 62.9, 46.7, 29.1, 17.6, 17.5. GPC-LS (expected  $M_n = 109,072$ )  $M_n = 115,357$ ,  $M_w = 128,053$ ,  $\mathcal{D} = 1.11$ .

## E. References

- (1) Lin, B.; Waymouth, R. M. Urea Anions: Simple, Fast, and Selective Catalysts for Ring-Opening Polymerizations. *J. Am. Chem. Soc.* **2017**, *139* (4), 1645–1652.
- (2) Pratt, R. C.; Lohmeijer, B. G. G.; Long, D. A.; Lundberg, P. N. P.; Dove, A. P.; Li, H.; Wade, C. G.; Waymouth, R. M.; Hedrick, J. L. Exploration, Optimization, and Application of Supramolecular Thiourea–Amine Catalysts for the Synthesis of Lactide (Co)Polymers. *Macromolecules* **2006**, *39* (23), 7863–7871.
- (3) Pratt, R. C.; Nederberg, F.; Waymouth, R. M.; Hedrick, J. L. Tagging Alcohols with Cyclic Carbonate: A Versatile Equivalent of (Meth)Acrylate for Ring-Opening Polymerization. *Chem. Commun.* **2008**, No. 1, 114–116.
- (4) Tan, E. W. P.; Hedrick, J. L.; Arrechea, P. L.; Erdmann, T.; Kiyek, V.; Lottier, S.; Yang, Y. Y.; Park, N. H. Overcoming Barriers in Polycarbonate Synthesis: A Streamlined Approach for the Synthesis of Cyclic Carbonate Monomers. *Macromolecules* **2021**, *54* (4), 1767–1774.
- (5) Germaneau, R.; Chavignon, R.; Tranchier, J.-P.; Rose-Munch, F.; Rose, E.; Collot, M.; Duhayon, C. (H6-Arene)Tricarbonylchromium and Ferrocene Complexes Linked to Binaphthyl Derivatives. *Organometallics* **2007**, *26* (25), 6139–6149.
- (6) Marsh, B. J.; Hampton, L.; Goggins, S.; Frost, C. G. Fine-Tuning of Ferrocene Redox Potentials towards Multiplex DNA Detection. *New J Chem* **2014**, *38* (11), 5260–5263.
- (7) Edzang, R. W. N.; Lejars, M.; Brisset, H.; Raimundo, J.-M.; Bressy, C. RAFT-Synthesized Polymers Based on New Ferrocenyl Methacrylates and Electrochemical Properties. *RSC Adv.* **2015**, *5* (94), 77019–77026.
- (8) Sanders, D. P.; Fukushima, K.; Coady, D. J.; Nelson, A.; Fujiwara, M.; Yasumoto, M.; Hedrick, J. L. A Simple and Efficient Synthesis of Functionalized Cyclic Carbonate Monomers Using a Versatile Pentafluorophenyl Ester Intermediate. *J. Am. Chem. Soc.* **2010**, *132* (42), 14724–14726.
- (9) Sloopweg, J. C.; Albada, H. B.; Siegmund, D.; Metzler-Nolte, N. Efficient Reagent-Saving Method for the N-Terminal Labeling of Bioactive Peptides with Organometallic Carboxylic Acids by Solid-Phase Synthesis. *Organometallics* **2016**, *35* (18), 3192–3196.
- (10) Ciampi, S.; Eggers, P. K.; Le Saux, G.; James, M.; Harper, J. B.; Gooding, J. J. Silicon (100) Electrodes Resistant to Oxidation in Aqueous Solutions: An Unexpected Benefit of Surface Acetylene Moieties. *Langmuir* **2009**, *25* (4), 2530–2539.
- (11) Barlow, S.; Cowley, A.; Green, J. C.; Brunker, T. J.; Hascall, T. The Ruthenocenylmethyl cation: Isolation and Structures of H5-Cyclopentadienyl-H6-Fulvene-Ruthenium(II) Salts. *Organometallics* **2001**, *20* (25), 5351–5359.
- (12) Rüttiger, C.; Hübner, H.; Schöttner, S.; Winter, T.; Cherkashinin, G.; Kuttich, B.; Stühn, B.; Gallei, M. Metallopolymer-Based Block Copolymers for the Preparation of Porous and Redox-Responsive Materials. *ACS Appl. Mater. Interfaces* **2018**, *10* (4), 4018–4030.
- (13) Alkan, A.; Gleede, T.; Wurm, F. R. Ruthenocenyl Glycidyl Ether: A Ruthenium-Containing Epoxide for Anionic Polymerization. *Organometallics* **2017**, *36* (16), 3023–3028.

## II. NMR Spectra from Synthesis of Monomers

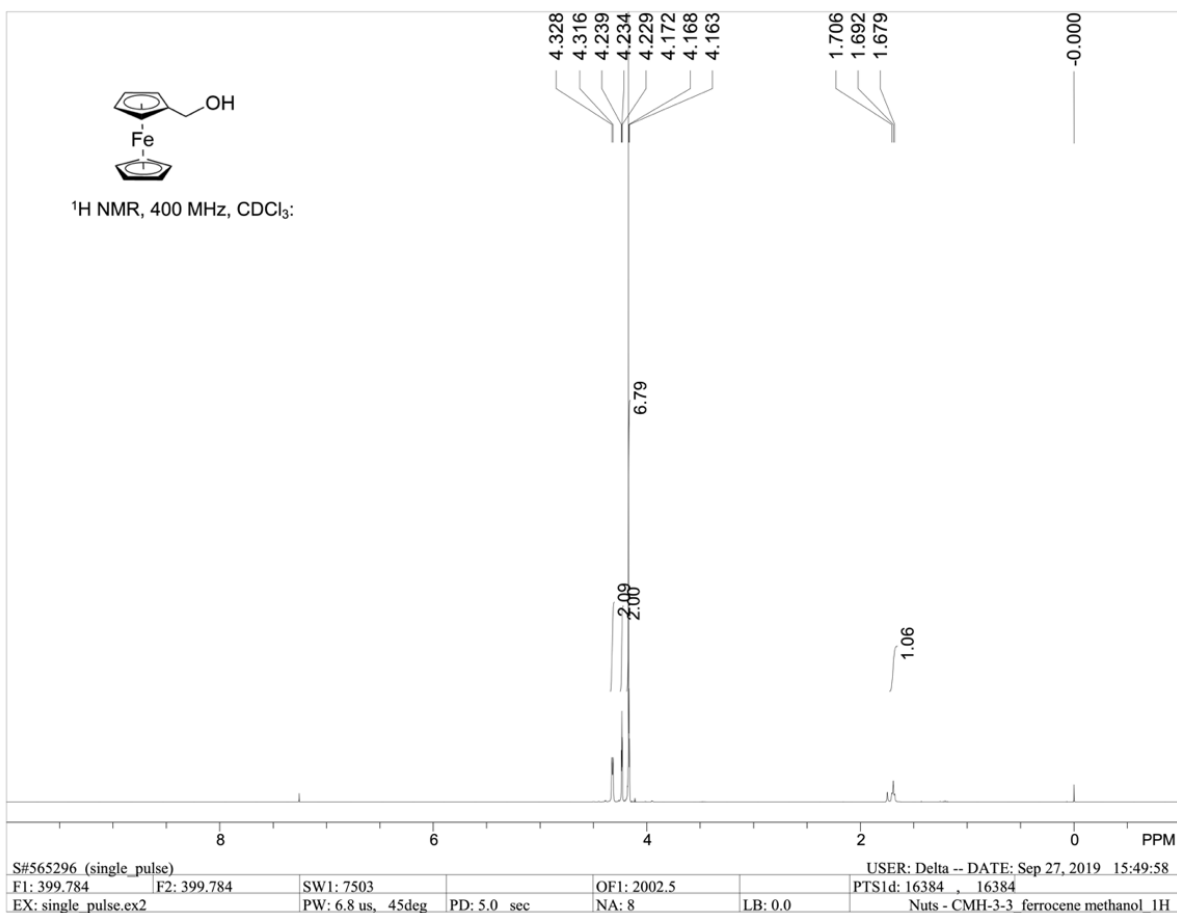

**Figure S1.** The <sup>1</sup>H NMR spectrum (CDCl<sub>3</sub>) of Ferrocenemethanol.

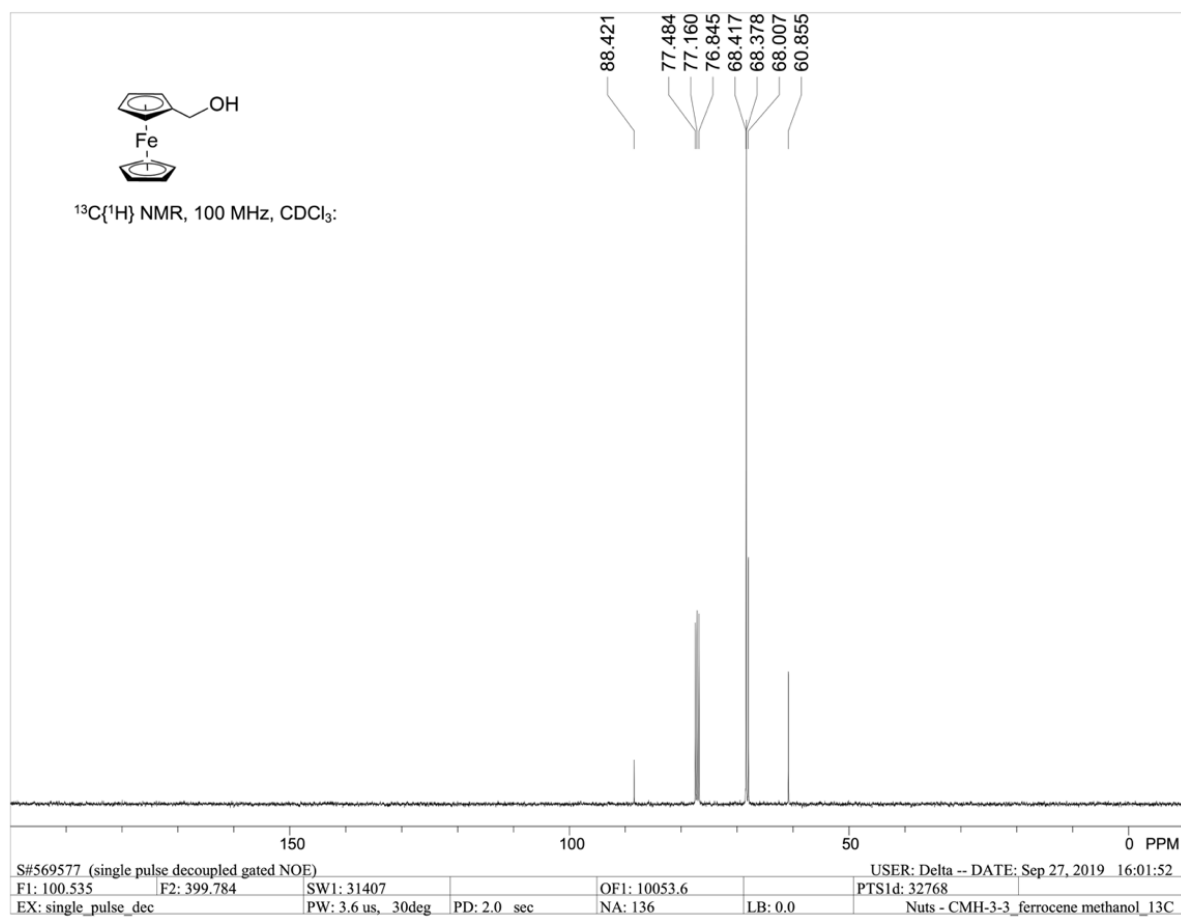

**Figure S2.** The <sup>13</sup>C NMR spectrum (CDCl<sub>3</sub>) of Ferrocenemethanol.



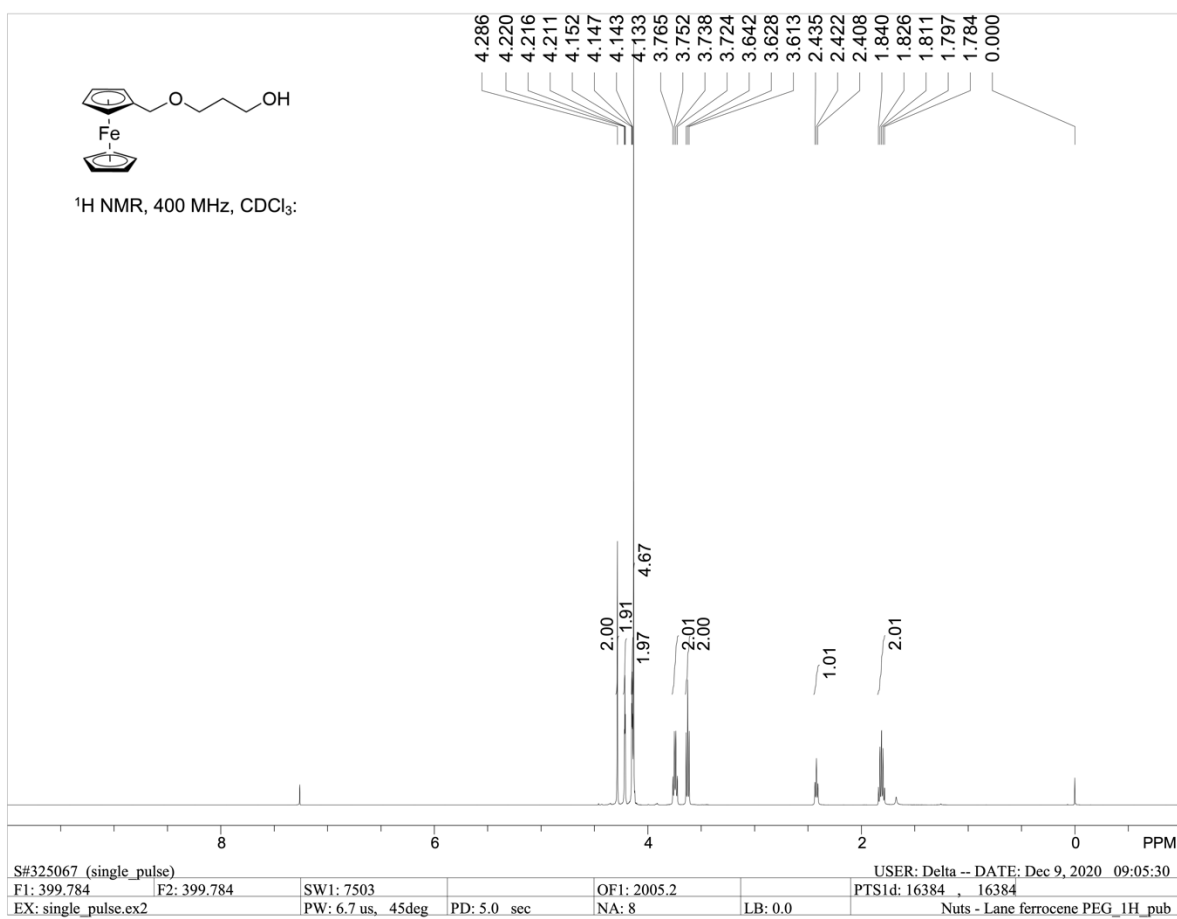

**Figure S3.** The <sup>1</sup>H NMR spectrum (CDCl<sub>3</sub>) of 3-(Ferrocenyloxy)propan-1-ol (**1**).



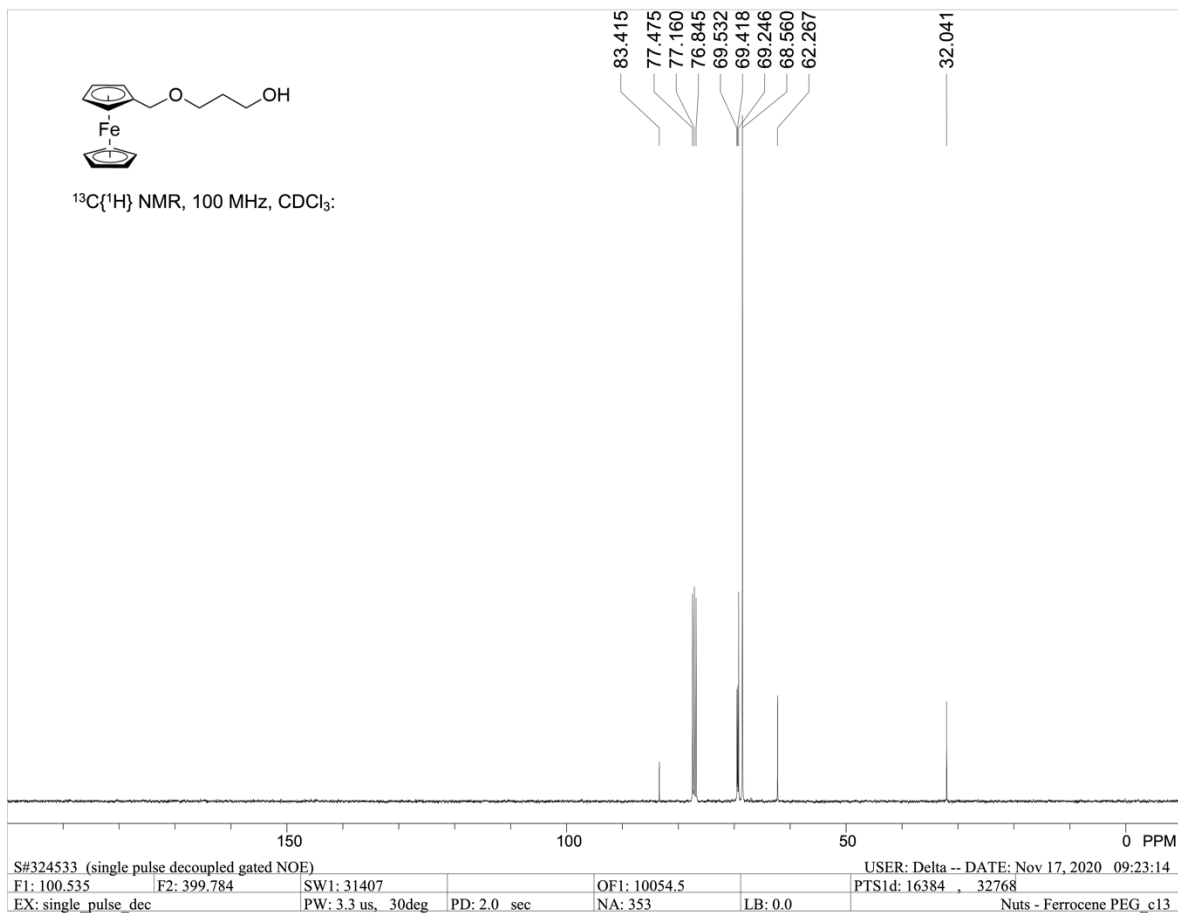

**Figure S4.** The  $^{13}\text{C}$  NMR spectrum ( $\text{CDCl}_3$ ) of 3-(Ferrocenyloxy)propan-1-ol (**1**).

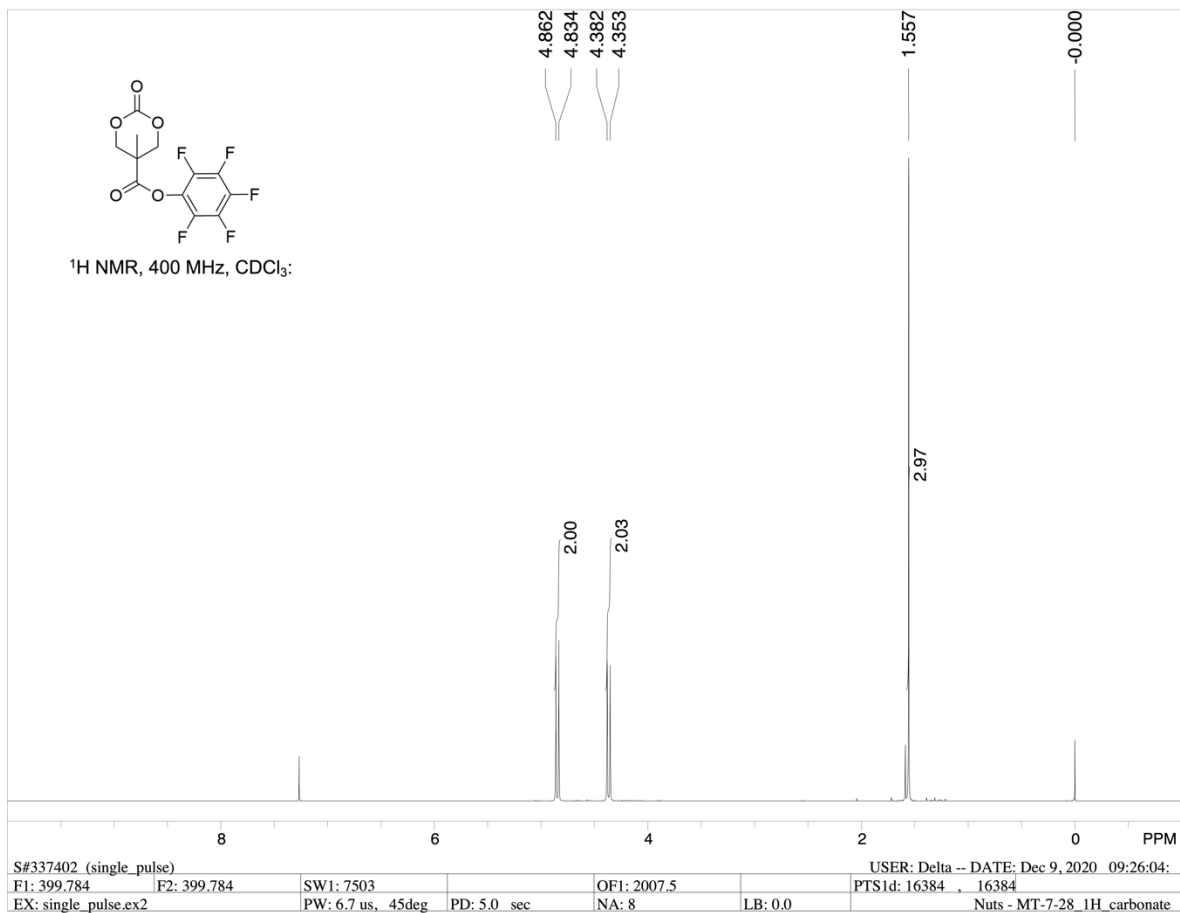

**Figure S5.** The <sup>1</sup>H NMR spectrum (CDCl<sub>3</sub>) of Perfluorophenyl 5-methyl-2-oxo-1,3-dioxane-5-carboxylate (**5**).

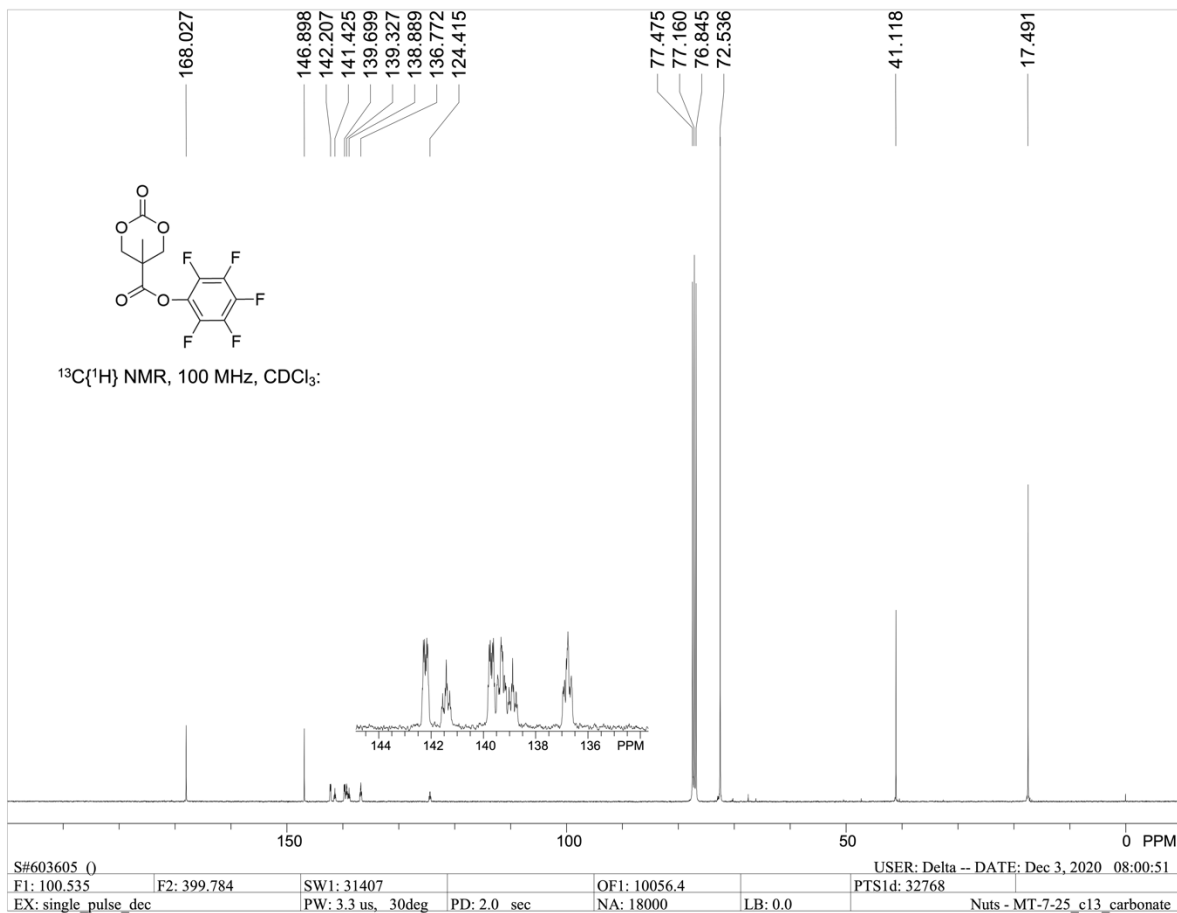

**Figure S6.** The <sup>13</sup>C NMR spectrum (CDCl<sub>3</sub>) of Perfluorophenyl 5-methyl-2-oxo-1,3-dioxane-5-carboxylate (**5**).

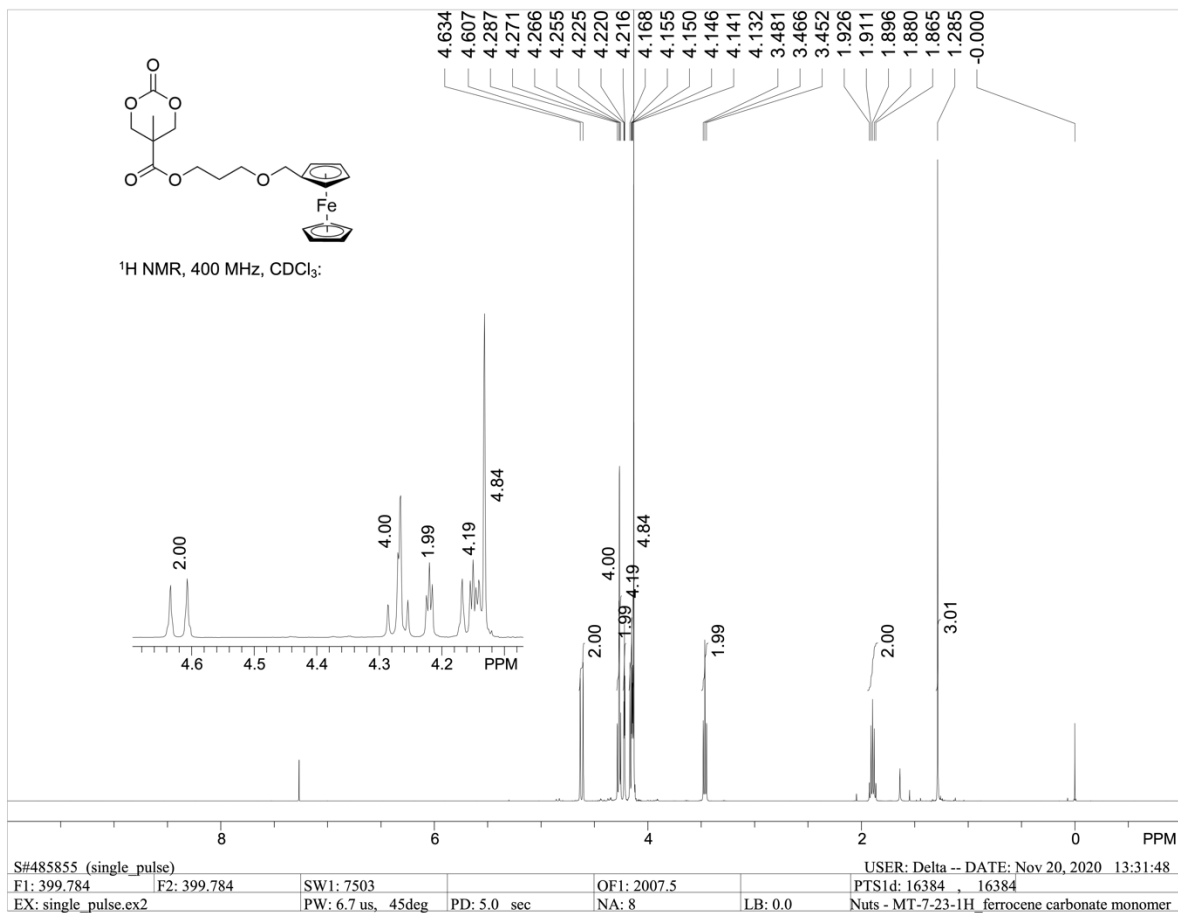

**Figure S7.** The <sup>1</sup>H NMR spectrum (CDCl<sub>3</sub>) of 3-(Ferrocenyloxy)propyl 5-methyl-2-oxo-1,3-dioxane-5-carboxylate (**2**).

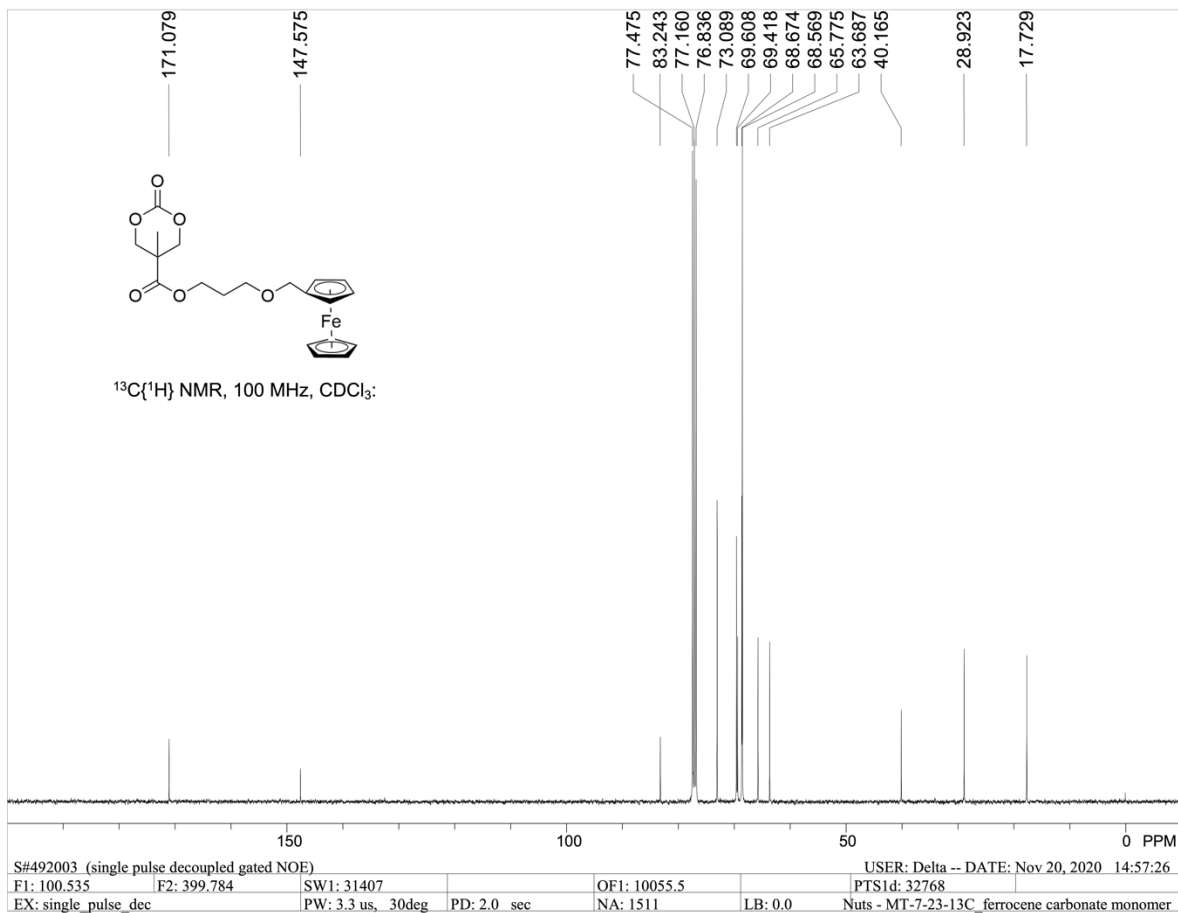

**Figure S8.** The <sup>13</sup>C NMR spectrum (CDCl<sub>3</sub>) of 3-(Ferrocenyloxy)propyl 5-methyl-2-oxo-1,3-dioxane-5-carboxylate (**2**).

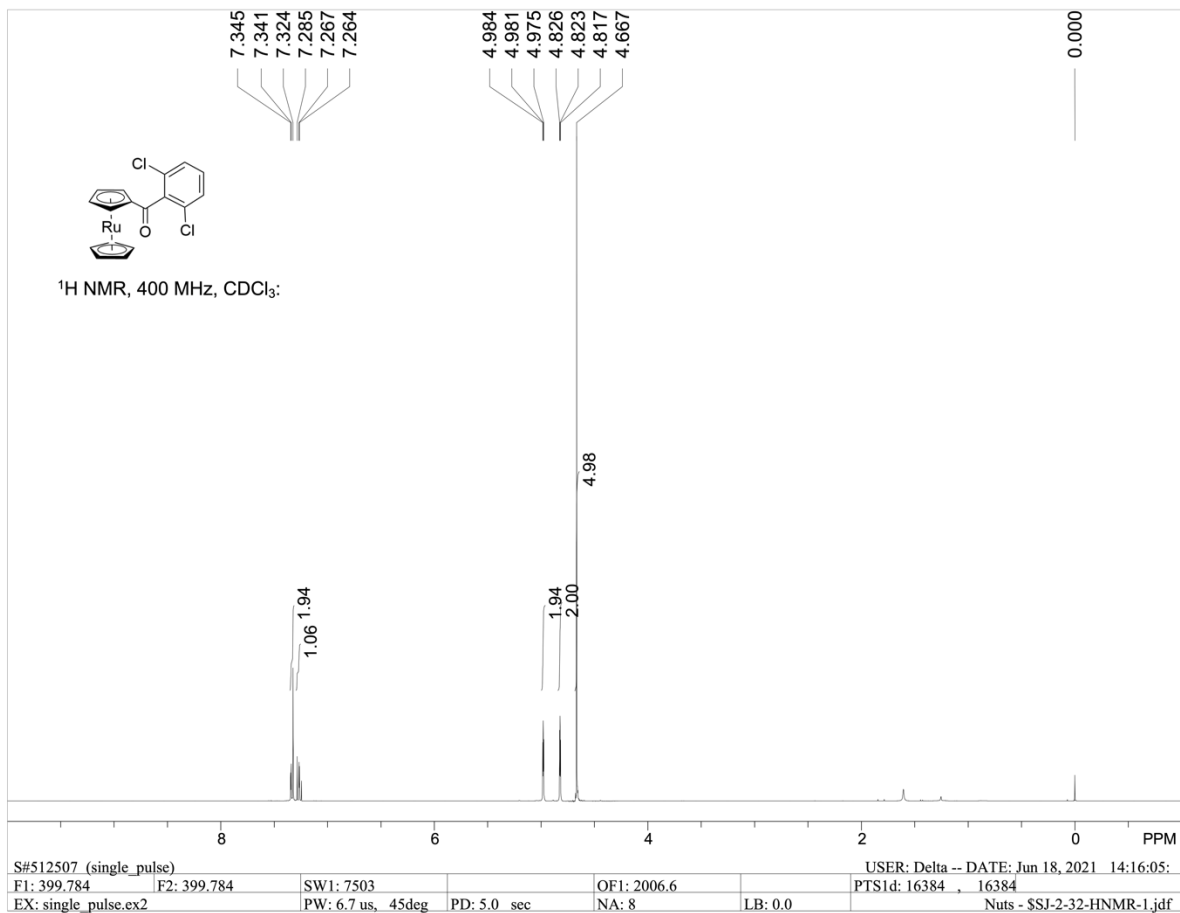

**Figure S9.** The <sup>1</sup>H NMR spectrum (CDCl<sub>3</sub>) of 2,6-Dichlorobenzoylruthenocene.

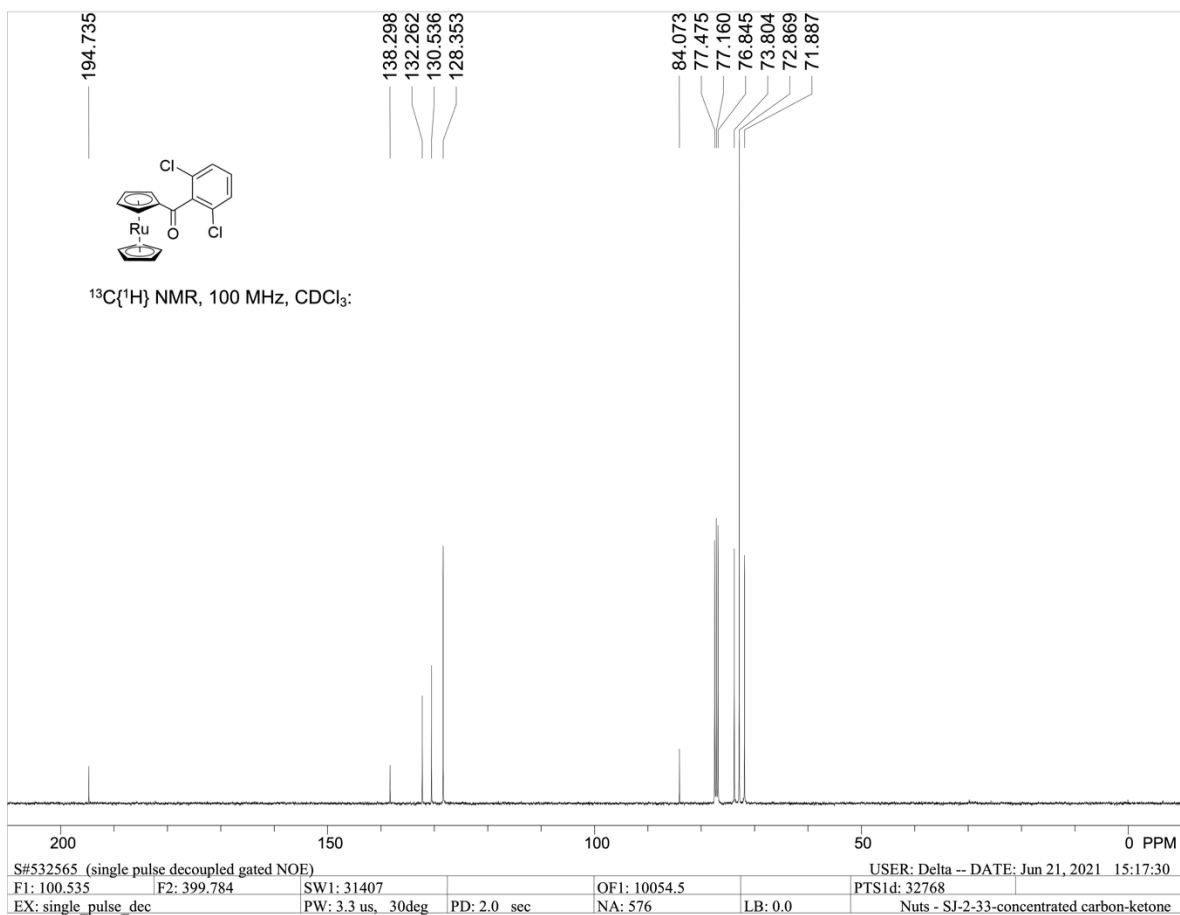

**Figure S10.** The <sup>13</sup>C NMR spectrum (CDCl<sub>3</sub>) of 2,6-Dichlorobenzoylruthenocene.

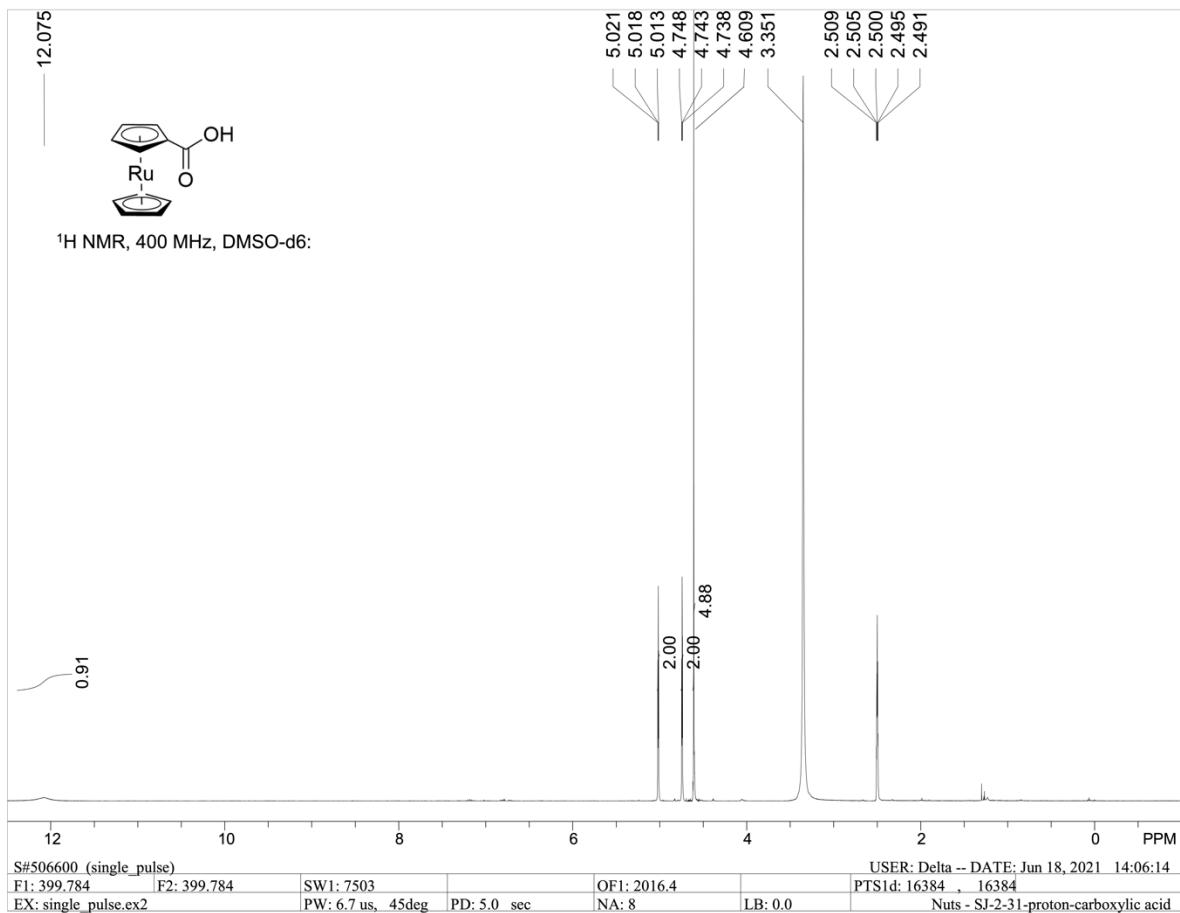

**Figure S11.** The <sup>1</sup>H NMR spectrum (DMSO-*d*<sub>6</sub>) of Ruthenocenecarboxylic Acid.



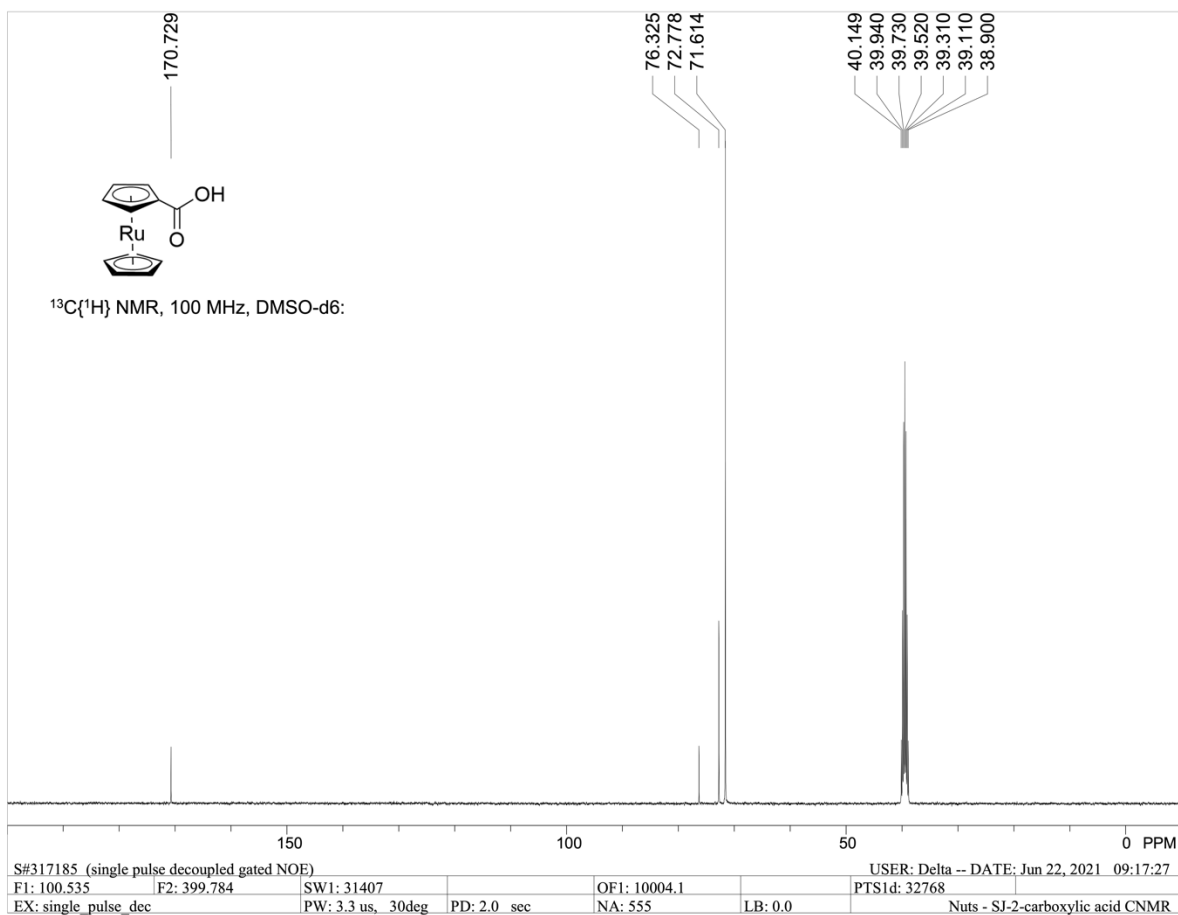

**Figure S12.** The  $^{13}\text{C}$  NMR spectrum (DMSO- $d_6$ ) of Ruthenocenecarboxylic Acid.

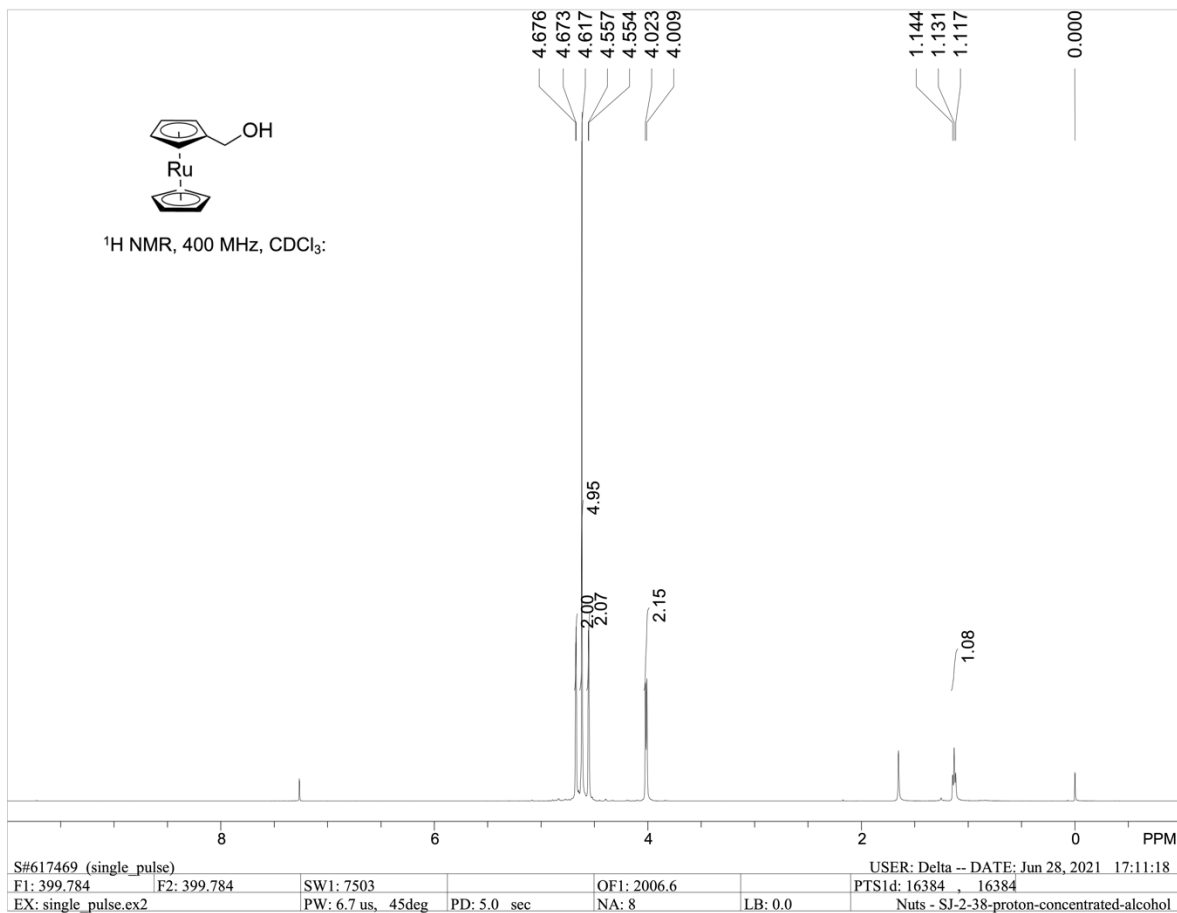

**Figure S13.** The <sup>1</sup>H NMR spectrum (CDCl<sub>3</sub>) of Hydroxymethylruthenocene.

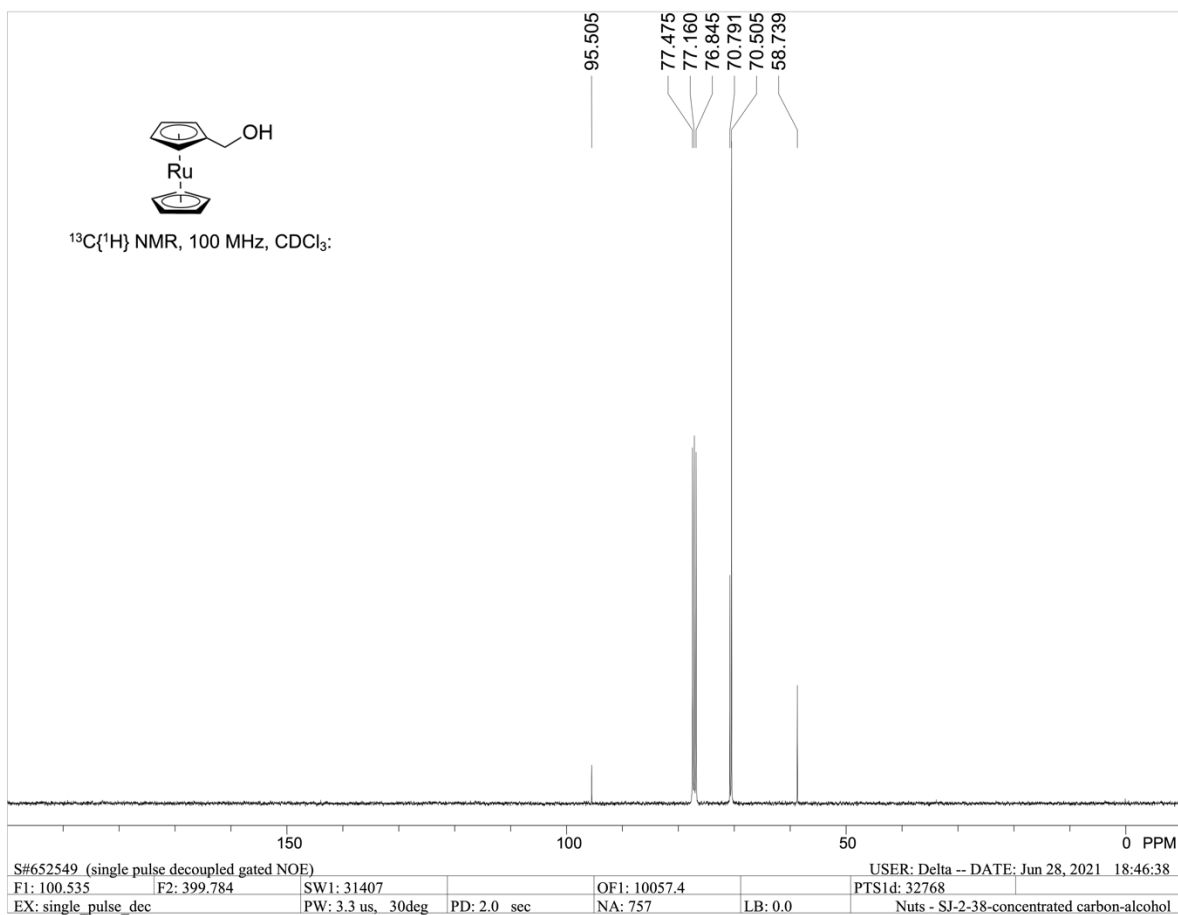

**Figure S14.** The <sup>13</sup>C NMR spectrum (CDCl<sub>3</sub>) of Hydroxymethylruthenocene.

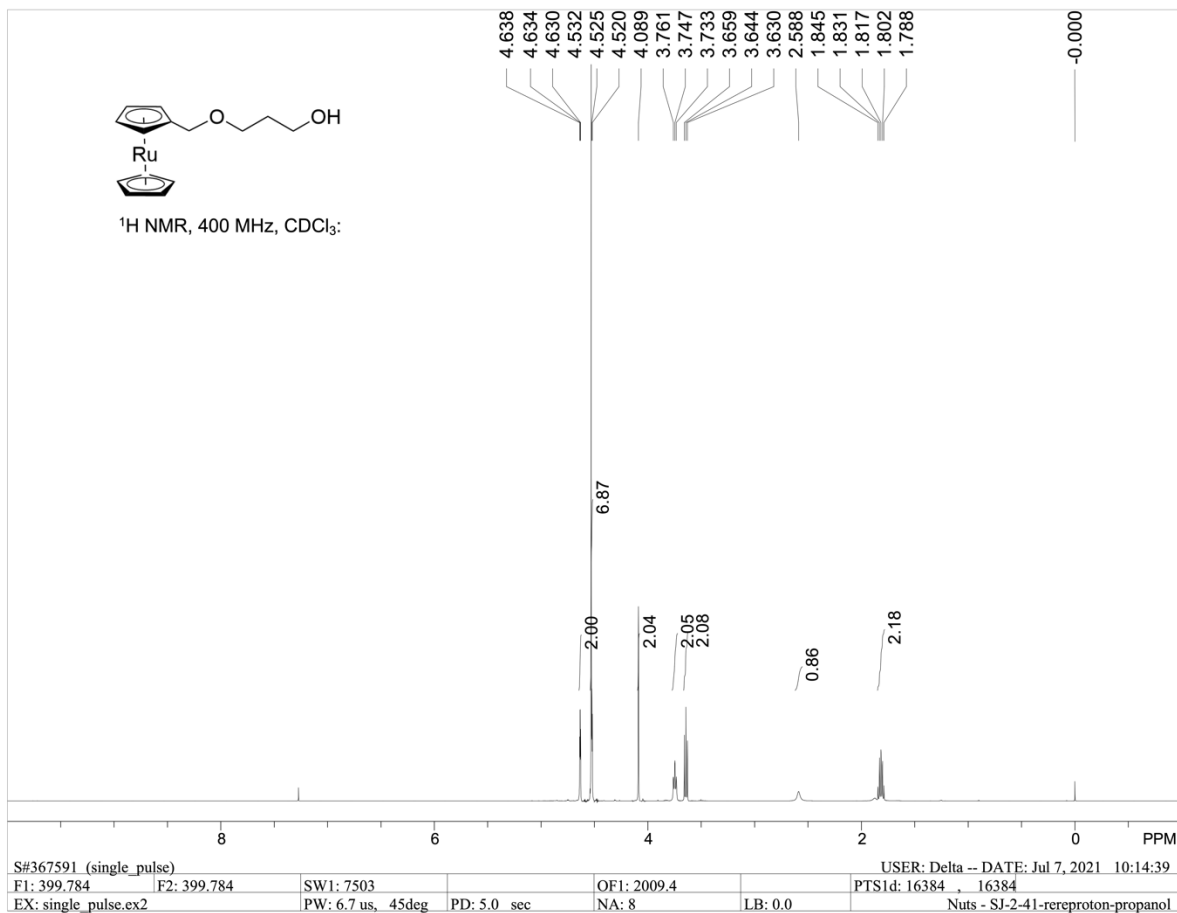

**Figure S15.** The <sup>1</sup>H NMR spectrum (CDCl<sub>3</sub>) of 3-(Ruthenocenyloxy)propan-1-ol (**3**).

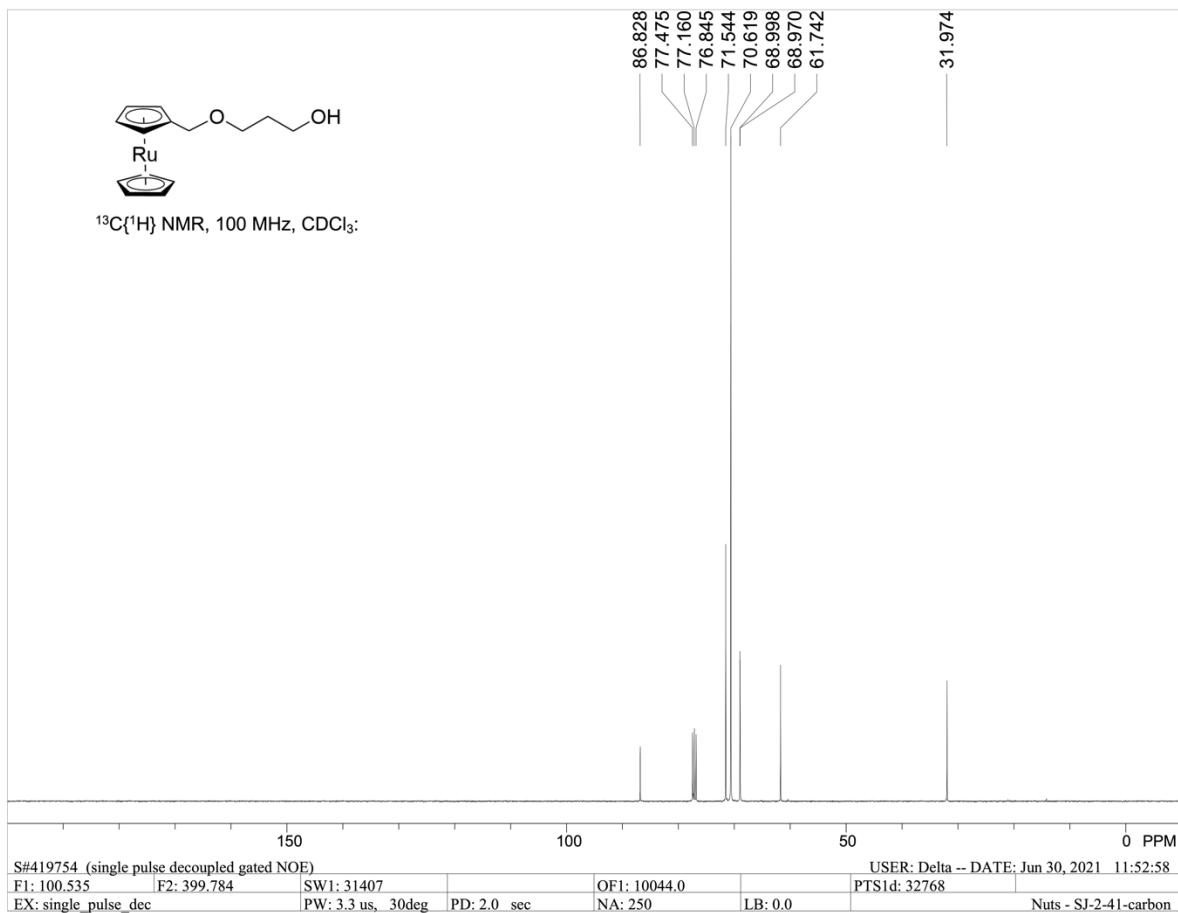

**Figure S16.** The  $^{13}\text{C}$  NMR spectrum ( $\text{CDCl}_3$ ) of 3-(Ruthenocenyloxy)propan-1-ol (**3**).

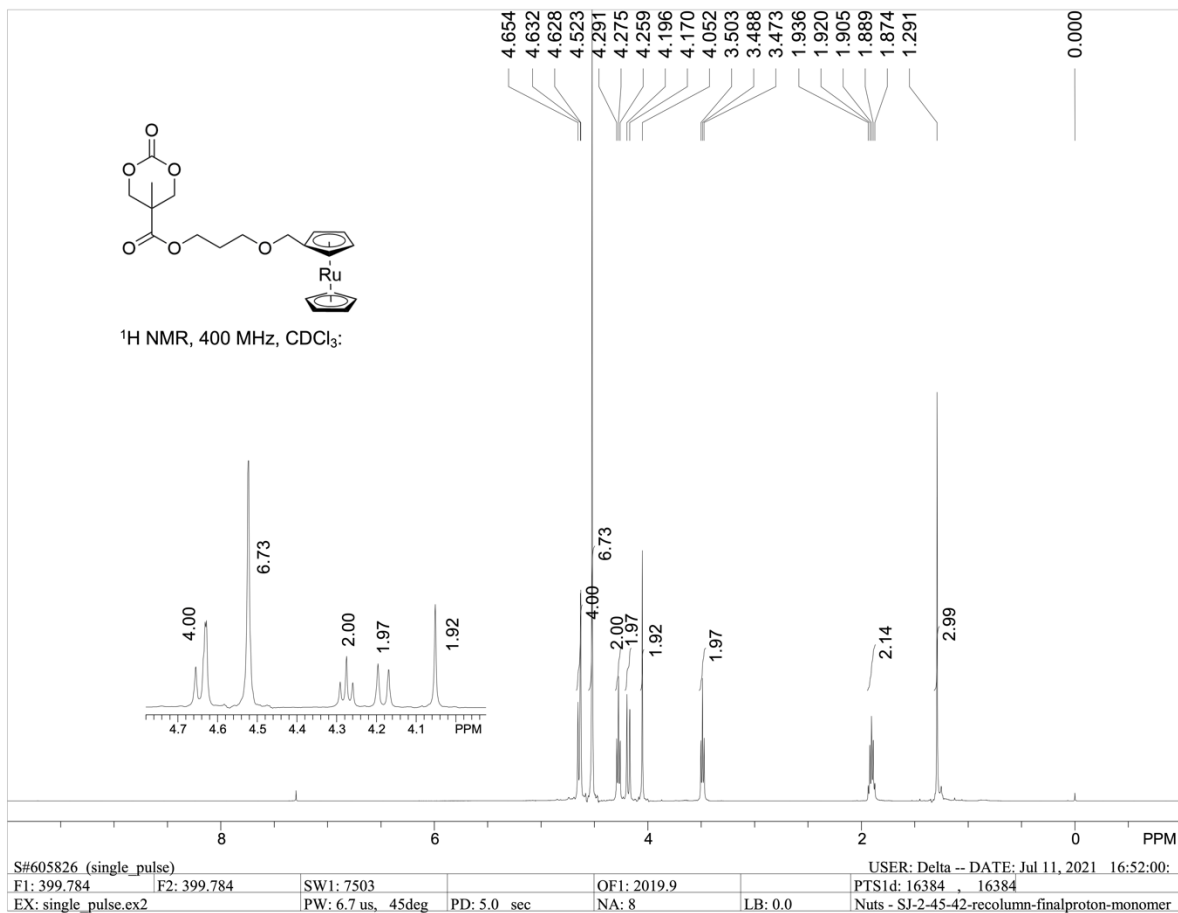

**Figure S17.** The <sup>1</sup>H NMR spectrum (CDCl<sub>3</sub>) of 3-(Ruthenocenyloxy)propyl 5-methyl-2-oxo-1,3-dioxane-5-carboxylate (**4**).

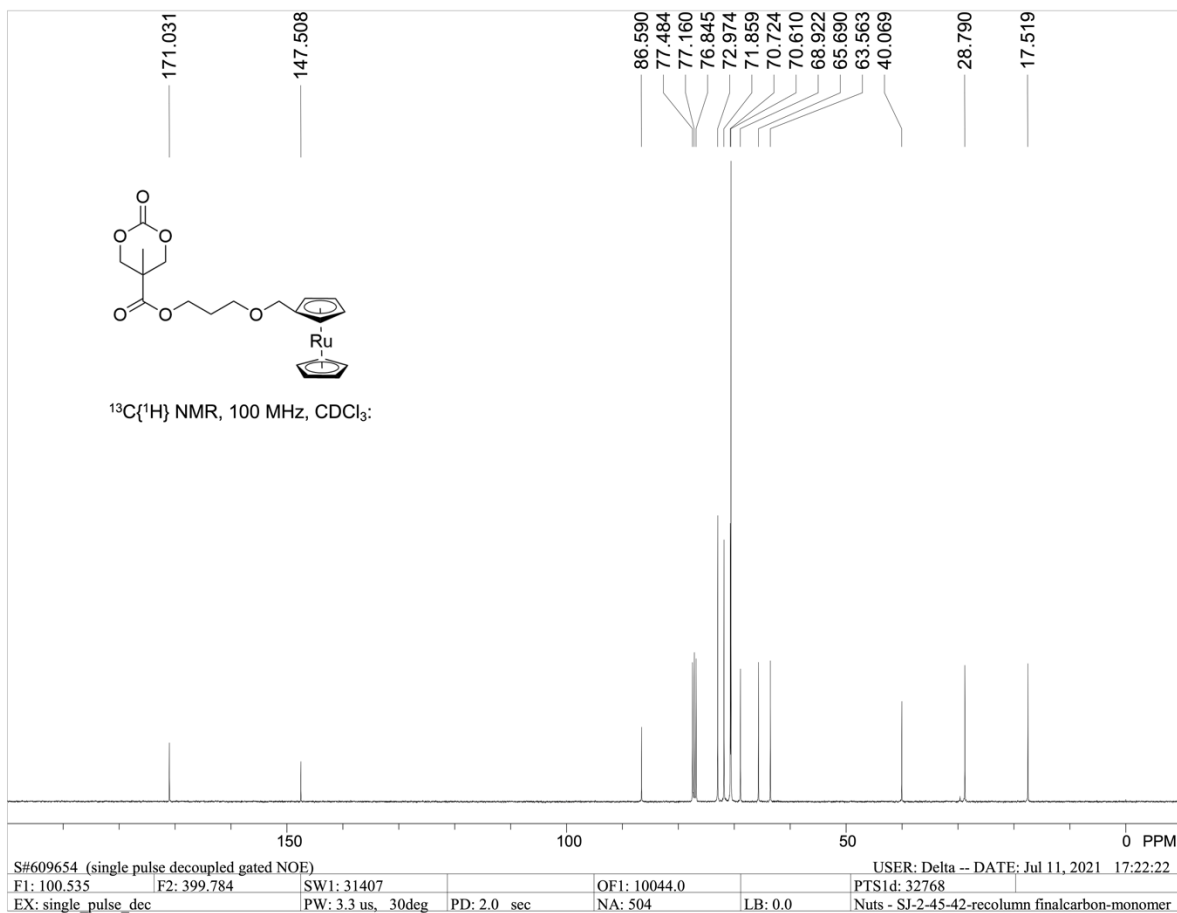

**Figure S18.** The <sup>13</sup>C NMR spectrum (CDCl<sub>3</sub>) of 3-(Ruthenocenyloxy)propyl 5-methyl-2-oxo-1,3-dioxane-5-carboxylate (**4**).

### III. X-Ray Structure of Ferrocene Monomer 2

**Experimental.** Yellow crystals suitable for X-ray diffraction were obtained by layering pentane on top of a concentrated solution of **2** in dichloromethane. Single crystals were coated with a trace of Fomblin oil and were mounted on the goniometer head of a Bruker Quest diffractometer with a fixed chi angle, a Mo K $\alpha$  wavelength ( $\lambda = 0.71073 \text{ \AA}$ ) sealed tube fine focus X-ray tube, single crystal curved graphite incident beam monochromator, and a Photon II area detector. The instrument is equipped with an Oxford Cryosystems low temperature device and examination and data collection were performed at 150 K. Data were collected, reflections were indexed and processed, and the files scaled and corrected for absorption using APEX3 [1] and SADABS [2]. The space group was assigned using XPREP within the SHELXTL suite of programs [3,4] and solved by direct methods using ShelXS [4] and refined by full matrix least squares against  $F^2$  with all reflections using Shelxl2018 [5] using the graphical interface Shelxle [6]. H atoms were positioned geometrically and constrained to ride on their parent atoms. C-H bond distances were constrained to 0.95  $\text{\AA}$  for cyclopentadienyl C-H moieties, and to 0.99 and 0.98  $\text{\AA}$  for aliphatic CH<sub>2</sub> and CH<sub>3</sub> moieties, respectively. Methyl H atoms were allowed to rotate but not to tip to best fit the experimental electron density.  $U_{\text{iso}}(\text{H})$  values were set to a multiple of  $U_{\text{eq}}(\text{C})$  with 1.5 for CH<sub>3</sub> and 1.2 for C-H and CH<sub>2</sub> units, respectively.

The structure emulates an orthorhombic C-centered lattice with double the volume of the actual primitive monoclinic cell and is twinned by the apparent orthorhombic symmetry. Application of the transformation matrix 1 0 1, 0 -1 0, 0 0 -1 (180° rotation around the c-axis) resulted in a twin ratio of 0.5371(7) to 0.4629(7). The structure also exhibits minor disorder across a pseudo-mirror plane perpendicular to the b-axis. Disorder is minor, smaller than 8%, but most minor atom positions were well resolved in difference density maps. Refinement of the minor moiety required strong geometry and thermal parameter restraints approximating a rigid body refinement. Major and minor disordered moieties were each restrained to have similar geometries (SAME restraint, esd 0.001  $\text{\AA}$ ).  $U^{\text{ij}}$  components of ADPs for disordered atoms related by the pseudo-mirror plane were pairwise restrained to be similar (SIMU restraint, esd 0.008  $\text{\AA}^2$ ; for atom pairs O2A and O2C, and O2B and O2D an esd of 0.004  $\text{\AA}^2$  was used). For the iron atoms Fe1B and Fe1D the ADPs were constrained to be exactly identical (EADP command). A rigid bond restraint (RIGU) was used for the minor moieties. Subject to these conditions the occupancy ratio refined to 0.9226(16) to 0.0774(16) for moieties A and C, and to 0.9763(10) to 0.0237(10) for moieties B and D.

Omission of disorder resulted in high residual electron peaks for the alternative iron atom positions (4.69 and 4.42 electrons) and substantially increased R-values ( $R_1 = 5.75$  instead of 4.17%). Complete crystallographic data, in CIF format, have been deposited with the Cambridge Crystallographic Data Centre. CCDC 2157240 contain the supplementary crystallographic data for this paper. These data can be obtained free of charge from The Cambridge Crystallographic Data Centre via [www.ccdc.cam.ac.uk/data\\_request/cif](http://www.ccdc.cam.ac.uk/data_request/cif).

#### References

- [1] Bruker (2019). Apex3 v2019.11-0, SAINT V8.40B, Bruker AXS Inc.: Madison (WI), USA.
- [2] Krause, L., Herbst-Irmer, R., Sheldrick, G.M. & Stalke, D. (2015). *J. Appl. Cryst.* 48, 3-10.
- [3] SHELXTL suite of programs, Version 6.14, 2000-2003, Bruker Advanced X-ray Solutions, Bruker AXS Inc., Madison, Wisconsin: USA
- [4] Sheldrick, G.M. A short history of SHELX. *Acta Crystallogr A.* 2008, 64(1), 112–122.



[5] a) Sheldrick, G.M. University of Göttingen, Germany, 2018. b) Sheldrick, G.M. Crystal structure refinement with SHELXL. *Acta Crystallogr Sect C Struct Chem.* 2015, 71(1), 3–8.

[6] Hübschle, C.B., Sheldrick, G.M. & Dittrich, B. ShelXle: a Qt graphical user interface for SHELXL. *J. Appl. Crystallogr.* 2011, 44(6), 1281–1284.

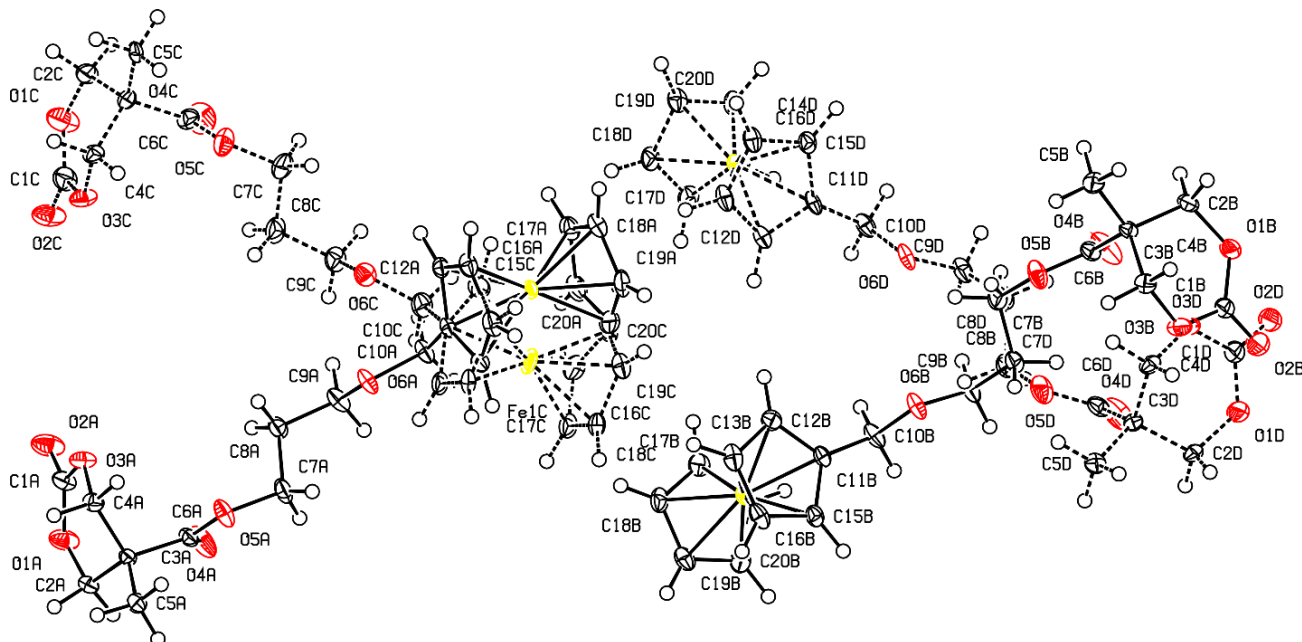

**Figure S19.** A view of the structure of ferrocene monomer **2**, showing the atom-labelling scheme. Displacement ellipsoids are drawn at the 50% probability level.

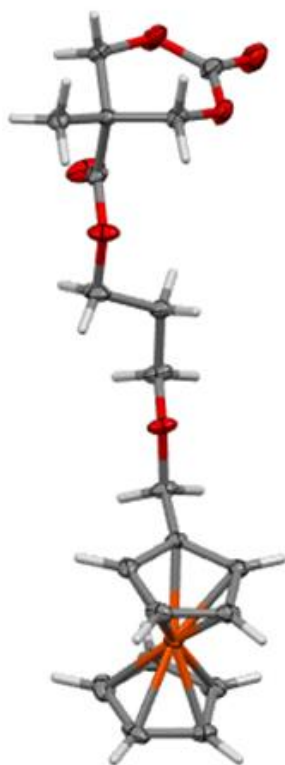

**Figure S20.** An expansion of one of the major moieties of ferrocene monomer **2**.

**Table S2. Experimental details**

|                                                                            |                                                                                                                                   |
|----------------------------------------------------------------------------|-----------------------------------------------------------------------------------------------------------------------------------|
|                                                                            | KO_152_0m                                                                                                                         |
| Crystal data                                                               |                                                                                                                                   |
| Chemical formula                                                           | C <sub>20</sub> H <sub>24</sub> FeO <sub>6</sub>                                                                                  |
| $M_r$                                                                      | 416.24                                                                                                                            |
| Crystal system, space group                                                | Monoclinic, <i>P2/c</i>                                                                                                           |
| Temperature (K)                                                            | 150                                                                                                                               |
| $a, b, c$ (Å)                                                              | 34.6729 (18), 5.8345 (3), 19.159 (1)                                                                                              |
| $\beta$ (°)                                                                | 106.030 (2)                                                                                                                       |
| $V$ (Å <sup>3</sup> )                                                      | 3725.1 (3)                                                                                                                        |
| $Z$                                                                        | 8                                                                                                                                 |
| $F(000)$                                                                   | 1744                                                                                                                              |
| $D_x$ (Mg m <sup>-3</sup> )                                                | 1.484                                                                                                                             |
| Radiation type                                                             | Mo $K\alpha$                                                                                                                      |
| No. of reflections for cell measurement                                    | 9893                                                                                                                              |
| $\theta$ range (°) for cell measurement                                    | 2.4–36.4                                                                                                                          |
| $\mu$ (mm <sup>-1</sup> )                                                  | 0.84                                                                                                                              |
| Crystal shape                                                              | Plate                                                                                                                             |
| Colour                                                                     | Yellow                                                                                                                            |
| Crystal size (mm)                                                          | 0.41 × 0.39 × 0.05                                                                                                                |
| Data collection                                                            |                                                                                                                                   |
| Diffractometer                                                             | Bruker AXS D8 Quest diffractometer with PhotonII charge-integrating pixel array detector (CPAD)                                   |
| Radiation source                                                           | fine focus sealed tube X-ray source                                                                                               |
| Monochromator                                                              | Triumph curved graphite crystal                                                                                                   |
| Detector resolution (pixels mm <sup>-1</sup> )                             | 7.4074                                                                                                                            |
| Scan method                                                                | $\omega$ and phi scans                                                                                                            |
| Absorption correction                                                      | Multi-scan, <i>SADABS</i> 2016/2: Krause, L., Herbst-Irmer, R., Sheldrick G.M. & Stalke D., <i>J. Appl. Cryst.</i> 48 (2015) 3-10 |
| $T_{\min}, T_{\max}$                                                       | 0.155, 0.223                                                                                                                      |
| No. of measured, independent and observed [ $I > 2\sigma(I)$ ] reflections | 66968, 16862, 16007                                                                                                               |
| $R_{\text{int}}$                                                           | 0.039                                                                                                                             |
| $\theta$ values (°)                                                        | $\theta_{\max} = 37.1, \theta_{\min} = 1.8$                                                                                       |
| $(\sin \theta/\lambda)_{\max}$ (Å <sup>-1</sup> )                          | 0.849                                                                                                                             |
| Range of $h, k, l$                                                         | $h = -58 \rightarrow 42, k = -8 \rightarrow 9, l = -30 \rightarrow 32$                                                            |

| Refinement                                                    |                                                                                  |
|---------------------------------------------------------------|----------------------------------------------------------------------------------|
| Refinement on                                                 | $F^2$                                                                            |
| $R[F^2 > 2\sigma(F^2)], wR(F^2), S$                           | 0.042, 0.094, 1.13                                                               |
| No. of reflections                                            | 16862                                                                            |
| No. of parameters                                             | 972                                                                              |
| No. of restraints                                             | 1169                                                                             |
| H-atom treatment                                              | H-atom parameters constrained                                                    |
| Weighting scheme                                              | $w = 1/[\sigma^2(F_o^2) + (0.0295P)^2 + 2.0271P]$ where $P = (F_o^2 + 2F_c^2)/3$ |
| $(\Delta/\sigma)_{\max}$                                      | 0.001                                                                            |
| $\Delta\rho_{\max}, \Delta\rho_{\min}$ (e $\text{\AA}^{-3}$ ) | 0.68, -0.55                                                                      |

**Table S3. Selected geometric parameters (Å, °)**

|           |             |           |             |
|-----------|-------------|-----------|-------------|
| Fe1A–C11A | 2.0348 (17) | Fe1C–C11C | 2.0348 (18) |
| Fe1A–C15A | 2.0349 (18) | Fe1C–C15C | 2.035 (2)   |
| Fe1A–C12A | 2.0362 (17) | Fe1C–C12C | 2.0362 (19) |
| Fe1A–C13A | 2.0399 (18) | Fe1C–C13C | 2.040 (2)   |
| Fe1A–C16A | 2.0431 (19) | Fe1C–C18C | 2.043 (2)   |
| Fe1A–C18A | 2.0431 (19) | Fe1C–C16C | 2.043 (2)   |
| Fe1A–C17A | 2.0432 (19) | Fe1C–C17C | 2.043 (2)   |
| Fe1A–C20A | 2.047 (2)   | Fe1C–C20C | 2.047 (2)   |
| Fe1A–C19A | 2.0489 (18) | Fe1C–C19C | 2.0489 (19) |
| Fe1A–C14A | 2.049 (2)   | Fe1C–C14C | 2.049 (2)   |
| O1A–C1A   | 1.324 (3)   | O1C–C1C   | 1.324 (3)   |
| O1A–C2A   | 1.454 (3)   | O1C–C2C   | 1.454 (3)   |
| O2A–C1A   | 1.201 (3)   | O2C–C1C   | 1.201 (3)   |
| O3A–C1A   | 1.344 (3)   | O3C–C1C   | 1.344 (3)   |
| O3A–C4A   | 1.454 (2)   | O3C–C4C   | 1.454 (3)   |
| O4A–C6A   | 1.200 (2)   | O4C–C6C   | 1.200 (3)   |
| O5A–C6A   | 1.337 (2)   | O5C–C6C   | 1.338 (2)   |
| O5A–C7A   | 1.464 (2)   | O5C–C7C   | 1.464 (3)   |
| O6A–C9A   | 1.426 (2)   | O6C–C9C   | 1.426 (3)   |
| O6A–C10A  | 1.440 (2)   | O6C–C10C  | 1.440 (2)   |
| C2A–C3A   | 1.521 (3)   | C2C–C3C   | 1.521 (3)   |
| C2A–H2AA  | 0.9900      | C2C–H2CA  | 0.9900      |
| C2A–H2AB  | 0.9900      | C2C–H2CB  | 0.9900      |
| C3A–C4A   | 1.512 (2)   | C3C–C4C   | 1.512 (3)   |
| C3A–C6A   | 1.525 (2)   | C3C–C6C   | 1.525 (2)   |
| C3A–C5A   | 1.534 (3)   | C3C–C5C   | 1.534 (3)   |
| C4A–H4AA  | 0.9900      | C4C–H4CA  | 0.9900      |
| C4A–H4AB  | 0.9900      | C4C–H4CB  | 0.9900      |
| C5A–H5AA  | 0.9800      | C5C–H5CA  | 0.9800      |
| C5A–H5AB  | 0.9800      | C5C–H5CB  | 0.9800      |
| C5A–H5AC  | 0.9800      | C5C–H5CC  | 0.9800      |
| C7A–C8A   | 1.503 (3)   | C7C–C8C   | 1.503 (3)   |
| C7A–H7AA  | 0.9900      | C7C–H7CA  | 0.9900      |
| C7A–H7AB  | 0.9900      | C7C–H7CB  | 0.9900      |
| C8A–C9A   | 1.508 (3)   | C8C–C9C   | 1.508 (3)   |
| C8A–H8AA  | 0.9900      | C8C–H8CA  | 0.9900      |

|           |             |           |             |
|-----------|-------------|-----------|-------------|
| C8A–H8AB  | 0.9900      | C8C–H8CB  | 0.9900      |
| C9A–H9AA  | 0.9900      | C9C–H9CA  | 0.9900      |
| C9A–H9AB  | 0.9900      | C9C–H9CB  | 0.9900      |
| C10A–C11A | 1.491 (3)   | C10C–C11C | 1.492 (3)   |
| C10A–H10A | 0.9900      | C10C–H10E | 0.9900      |
| C10A–H10B | 0.9900      | C10C–H10F | 0.9900      |
| C11A–C12A | 1.426 (3)   | C11C–C12C | 1.426 (3)   |
| C11A–C15A | 1.431 (3)   | C11C–C15C | 1.431 (3)   |
| C12A–C13A | 1.431 (3)   | C12C–C13C | 1.431 (3)   |
| C12A–H12A | 1.0000      | C12C–H12C | 1.0000      |
| C13A–C14A | 1.429 (3)   | C13C–C14C | 1.429 (3)   |
| C13A–H13A | 1.0000      | C13C–H13C | 1.0000      |
| C14A–C15A | 1.432 (3)   | C14C–C15C | 1.432 (3)   |
| C14A–H14A | 1.0000      | C14C–H14C | 1.0000      |
| C15A–H15A | 1.0000      | C15C–H15C | 1.0000      |
| C16A–C17A | 1.413 (3)   | C16C–C17C | 1.413 (3)   |
| C16A–C20A | 1.422 (4)   | C16C–C20C | 1.422 (4)   |
| C16A–H16A | 1.0000      | C16C–H16C | 1.0000      |
| C17A–C18A | 1.423 (3)   | C17C–C18C | 1.423 (3)   |
| C17A–H17A | 1.0000      | C17C–H17C | 1.0000      |
| C18A–C19A | 1.419 (3)   | C18C–C19C | 1.419 (3)   |
| C18A–H18A | 1.0000      | C18C–H18C | 1.0000      |
| C19A–C20A | 1.431 (4)   | C19C–C20C | 1.431 (4)   |
| C19A–H19A | 1.0000      | C19C–H19C | 1.0000      |
| C20A–H20A | 1.0000      | C20C–H20C | 1.0000      |
| Fe1B–C11B | 2.0374 (16) | Fe1D–C11D | 2.0349 (18) |
| Fe1B–C19B | 2.0397 (17) | Fe1D–C15D | 2.035 (2)   |
| Fe1B–C15B | 2.0411 (17) | Fe1D–C12D | 2.0362 (19) |
| Fe1B–C18B | 2.0464 (17) | Fe1D–C13D | 2.040 (2)   |
| Fe1B–C12B | 2.0472 (18) | Fe1D–C18D | 2.043 (2)   |
| Fe1B–C20B | 2.0489 (18) | Fe1D–C16D | 2.043 (2)   |
| Fe1B–C14B | 2.0526 (18) | Fe1D–C17D | 2.043 (2)   |
| Fe1B–C17B | 2.054 (2)   | Fe1D–C20D | 2.047 (2)   |
| Fe1B–C13B | 2.054 (2)   | Fe1D–C19D | 2.049 (2)   |
| Fe1B–C16B | 2.0554 (18) | Fe1D–C14D | 2.049 (2)   |
| O1B–C1B   | 1.327 (2)   | O1D–C1D   | 1.324 (3)   |
| O1B–C2B   | 1.454 (2)   | O1D–C2D   | 1.454 (3)   |

|           |           |           |           |
|-----------|-----------|-----------|-----------|
| O2B-C1B   | 1.197 (2) | O2D-C1D   | 1.201 (3) |
| O3B-C1B   | 1.350 (2) | O3D-C1D   | 1.344 (3) |
| O3B-C4B   | 1.443 (2) | O3D-C4D   | 1.454 (3) |
| O4B-C6B   | 1.202 (2) | O4D-C6D   | 1.200 (3) |
| O5B-C6B   | 1.338 (2) | O5D-C6D   | 1.338 (2) |
| O5B-C7B   | 1.455 (2) | O5D-C7D   | 1.464 (3) |
| O6B-C9B   | 1.424 (2) | O6D-C9D   | 1.426 (3) |
| O6B-C10B  | 1.435 (2) | O6D-C10D  | 1.440 (2) |
| C2B-C3B   | 1.516 (2) | C2D-C3D   | 1.521 (3) |
| C2B-H2BA  | 0.9900    | C2D-H2DA  | 0.9900    |
| C2B-H2BB  | 0.9900    | C2D-H2DB  | 0.9900    |
| C3B-C4B   | 1.521 (2) | C3D-C4D   | 1.512 (3) |
| C3B-C6B   | 1.527 (2) | C3D-C6D   | 1.525 (2) |
| C3B-C5B   | 1.533 (2) | C3D-C5D   | 1.534 (3) |
| C4B-H4BA  | 0.9900    | C4D-H4DA  | 0.9900    |
| C4B-H4BB  | 0.9900    | C4D-H4DB  | 0.9900    |
| C5B-H5BA  | 0.9800    | C5D-H5DA  | 0.9800    |
| C5B-H5BB  | 0.9800    | C5D-H5DB  | 0.9800    |
| C5B-H5BC  | 0.9800    | C5D-H5DC  | 0.9800    |
| C7B-C8B   | 1.493 (3) | C7D-C8D   | 1.503 (3) |
| C7B-H7BA  | 0.9900    | C7D-H7DA  | 0.9900    |
| C7B-H7BB  | 0.9900    | C7D-H7DB  | 0.9900    |
| C8B-C9B   | 1.527 (3) | C8D-C9D   | 1.508 (3) |
| C8B-H8BA  | 0.9900    | C8D-H8DA  | 0.9900    |
| C8B-H8BB  | 0.9900    | C8D-H8DB  | 0.9900    |
| C9B-H9BA  | 0.9900    | C9D-H9DA  | 0.9900    |
| C9B-H9BB  | 0.9900    | C9D-H9DB  | 0.9900    |
| C10B-C11B | 1.486 (3) | C10D-C11D | 1.491 (3) |
| C10B-H10C | 0.9900    | C10D-H10G | 0.9900    |
| C10B-H10D | 0.9900    | C10D-H10H | 0.9900    |
| C11B-C12B | 1.429 (3) | C11D-C12D | 1.426 (3) |
| C11B-C15B | 1.437 (3) | C11D-C15D | 1.431 (3) |
| C12B-C13B | 1.435 (3) | C12D-C13D | 1.431 (3) |
| C12B-H12B | 1.0000    | C12D-H12D | 1.0000    |
| C13B-C14B | 1.420 (3) | C13D-C14D | 1.429 (3) |
| C13B-H13B | 1.0000    | C13D-H13D | 1.0000    |
| C14B-C15B | 1.429 (3) | C14D-C15D | 1.432 (3) |

|                |             |                |             |
|----------------|-------------|----------------|-------------|
| C14B–H14B      | 1.0000      | C14D–H14D      | 1.0000      |
| C15B–H15B      | 1.0000      | C15D–H15D      | 1.0000      |
| C16B–C20B      | 1.420 (3)   | C16D–C17D      | 1.413 (3)   |
| C16B–C17B      | 1.432 (3)   | C16D–C20D      | 1.422 (4)   |
| C16B–H16B      | 1.0000      | C16D–H16D      | 1.0000      |
| C17B–C18B      | 1.426 (3)   | C17D–C18D      | 1.423 (3)   |
| C17B–H17B      | 1.0000      | C17D–H17D      | 1.0000      |
| C18B–C19B      | 1.417 (3)   | C18D–C19D      | 1.419 (3)   |
| C18B–H18B      | 1.0000      | C18D–H18D      | 1.0000      |
| C19B–C20B      | 1.431 (3)   | C19D–C20D      | 1.431 (4)   |
| C19B–H19B      | 1.0000      | C19D–H19D      | 1.0000      |
| C20B–H20B      | 1.0000      | C20D–H20D      | 1.0000      |
|                |             |                |             |
| C11A–Fe1A–C15A | 41.18 (8)   | C11C–Fe1C–C15C | 41.18 (9)   |
| C11A–Fe1A–C12A | 41.02 (8)   | C11C–Fe1C–C12C | 41.02 (8)   |
| C15A–Fe1A–C12A | 69.03 (8)   | C15C–Fe1C–C12C | 69.03 (9)   |
| C11A–Fe1A–C13A | 69.23 (8)   | C11C–Fe1C–C13C | 69.24 (9)   |
| C15A–Fe1A–C13A | 68.97 (8)   | C15C–Fe1C–C13C | 68.98 (9)   |
| C12A–Fe1A–C13A | 41.12 (7)   | C12C–Fe1C–C13C | 41.12 (8)   |
| C11A–Fe1A–C16A | 106.54 (8)  | C11C–Fe1C–C18C | 158.35 (12) |
| C15A–Fe1A–C16A | 122.47 (9)  | C15C–Fe1C–C18C | 159.27 (11) |
| C12A–Fe1A–C16A | 122.09 (9)  | C12C–Fe1C–C18C | 122.43 (11) |
| C13A–Fe1A–C16A | 158.61 (9)  | C13C–Fe1C–C18C | 107.30 (10) |
| C11A–Fe1A–C18A | 158.36 (8)  | C11C–Fe1C–C16C | 106.52 (10) |
| C15A–Fe1A–C18A | 159.27 (8)  | C15C–Fe1C–C16C | 122.47 (11) |
| C12A–Fe1A–C18A | 122.42 (8)  | C12C–Fe1C–C16C | 122.07 (11) |
| C13A–Fe1A–C18A | 107.29 (8)  | C13C–Fe1C–C16C | 158.59 (12) |
| C16A–Fe1A–C18A | 68.49 (8)   | C18C–Fe1C–C16C | 68.48 (10)  |
| C11A–Fe1A–C17A | 121.93 (8)  | C11C–Fe1C–C17C | 121.92 (11) |
| C15A–Fe1A–C17A | 158.42 (9)  | C15C–Fe1C–C17C | 158.42 (12) |
| C12A–Fe1A–C17A | 106.91 (8)  | C12C–Fe1C–C17C | 106.90 (10) |
| C13A–Fe1A–C17A | 122.76 (9)  | C13C–Fe1C–C17C | 122.75 (11) |
| C16A–Fe1A–C17A | 40.45 (9)   | C18C–Fe1C–C17C | 40.75 (9)   |
| C18A–Fe1A–C17A | 40.75 (8)   | C16C–Fe1C–C17C | 40.45 (9)   |
| C11A–Fe1A–C20A | 122.55 (10) | C11C–Fe1C–C20C | 122.53 (12) |
| C15A–Fe1A–C20A | 107.54 (10) | C15C–Fe1C–C20C | 107.54 (12) |
| C12A–Fe1A–C20A | 158.62 (10) | C12C–Fe1C–C20C | 158.59 (12) |

|                |             |                |             |
|----------------|-------------|----------------|-------------|
| C13A-Fe1A-C20A | 159.14 (10) | C13C-Fe1C-C20C | 159.16 (13) |
| C16A-Fe1A-C20A | 40.68 (10)  | C18C-Fe1C-C20C | 68.27 (11)  |
| C18A-Fe1A-C20A | 68.28 (10)  | C16C-Fe1C-C20C | 40.67 (11)  |
| C17A-Fe1A-C20A | 68.09 (10)  | C17C-Fe1C-C20C | 68.09 (11)  |
| C11A-Fe1A-C19A | 159.24 (9)  | C11C-Fe1C-C19C | 159.23 (12) |
| C15A-Fe1A-C19A | 123.00 (8)  | C15C-Fe1C-C19C | 123.00 (11) |
| C12A-Fe1A-C19A | 158.64 (9)  | C12C-Fe1C-C19C | 158.66 (12) |
| C13A-Fe1A-C19A | 122.51 (9)  | C13C-Fe1C-C19C | 122.54 (11) |
| C16A-Fe1A-C19A | 68.82 (9)   | C18C-Fe1C-C19C | 40.57 (9)   |
| C18A-Fe1A-C19A | 40.57 (9)   | C16C-Fe1C-C19C | 68.81 (10)  |
| C17A-Fe1A-C19A | 68.48 (8)   | C17C-Fe1C-C19C | 68.48 (9)   |
| C20A-Fe1A-C19A | 40.90 (11)  | C20C-Fe1C-C19C | 40.90 (11)  |
| C11A-Fe1A-C14A | 69.34 (8)   | C11C-Fe1C-C14C | 69.34 (9)   |
| C15A-Fe1A-C14A | 41.06 (9)   | C15C-Fe1C-C14C | 41.06 (10)  |
| C12A-Fe1A-C14A | 69.09 (8)   | C12C-Fe1C-C14C | 69.10 (9)   |
| C13A-Fe1A-C14A | 40.90 (9)   | C13C-Fe1C-C14C | 40.90 (10)  |
| C16A-Fe1A-C14A | 159.03 (10) | C18C-Fe1C-C14C | 122.88 (11) |
| C18A-Fe1A-C14A | 122.87 (9)  | C16C-Fe1C-C14C | 159.04 (13) |
| C17A-Fe1A-C14A | 159.12 (10) | C17C-Fe1C-C14C | 159.12 (12) |
| C20A-Fe1A-C14A | 123.05 (10) | C20C-Fe1C-C14C | 123.06 (13) |
| C19A-Fe1A-C14A | 107.37 (8)  | C19C-Fe1C-C14C | 107.39 (10) |
| C1A-O1A-C2A    | 123.57 (16) | C1C-O1C-C2C    | 123.5 (2)   |
| C1A-O3A-C4A    | 120.02 (17) | C1C-O3C-C4C    | 120.0 (3)   |
| C6A-O5A-C7A    | 116.10 (16) | C6C-O5C-C7C    | 116.1 (2)   |
| C9A-O6A-C10A   | 111.62 (14) | C9C-O6C-C10C   | 111.6 (2)   |
| O2A-C1A-O1A    | 120.9 (2)   | O2C-C1C-O1C    | 120.9 (3)   |
| O2A-C1A-O3A    | 119.57 (19) | O2C-C1C-O3C    | 119.6 (2)   |
| O1A-C1A-O3A    | 119.55 (19) | O1C-C1C-O3C    | 119.6 (2)   |
| O1A-C2A-C3A    | 113.38 (14) | O1C-C2C-C3C    | 113.4 (2)   |
| O1A-C2A-H2AA   | 108.9       | O1C-C2C-H2CA   | 108.9       |
| C3A-C2A-H2AA   | 108.9       | C3C-C2C-H2CA   | 108.9       |
| O1A-C2A-H2AB   | 108.9       | O1C-C2C-H2CB   | 108.9       |
| C3A-C2A-H2AB   | 108.9       | C3C-C2C-H2CB   | 108.9       |
| H2AA-C2A-H2AB  | 107.7       | H2CA-C2C-H2CB  | 107.7       |
| C4A-C3A-C2A    | 105.95 (15) | C4C-C3C-C2C    | 105.97 (19) |
| C4A-C3A-C6A    | 109.77 (14) | C4C-C3C-C6C    | 109.77 (19) |
| C2A-C3A-C6A    | 110.02 (15) | C2C-C3C-C6C    | 110.0 (2)   |



|               |             |               |           |
|---------------|-------------|---------------|-----------|
| C4A-C3A-C5A   | 110.07 (15) | C4C-C3C-C5C   | 110.1 (2) |
| C2A-C3A-C5A   | 110.20 (15) | C2C-C3C-C5C   | 110.2 (2) |
| C6A-C3A-C5A   | 110.72 (15) | C6C-C3C-C5C   | 110.7 (2) |
| O3A-C4A-C3A   | 109.80 (15) | O3C-C4C-C3C   | 109.8 (2) |
| O3A-C4A-H4AA  | 109.7       | O3C-C4C-H4CA  | 109.7     |
| C3A-C4A-H4AA  | 109.7       | C3C-C4C-H4CA  | 109.7     |
| O3A-C4A-H4AB  | 109.7       | O3C-C4C-H4CB  | 109.7     |
| C3A-C4A-H4AB  | 109.7       | C3C-C4C-H4CB  | 109.7     |
| H4AA-C4A-H4AB | 108.2       | H4CA-C4C-H4CB | 108.2     |
| C3A-C5A-H5AA  | 109.5       | C3C-C5C-H5CA  | 109.5     |
| C3A-C5A-H5AB  | 109.5       | C3C-C5C-H5CB  | 109.5     |
| H5AA-C5A-H5AB | 109.5       | H5CA-C5C-H5CB | 109.5     |
| C3A-C5A-H5AC  | 109.5       | C3C-C5C-H5CC  | 109.5     |
| H5AA-C5A-H5AC | 109.5       | H5CA-C5C-H5CC | 109.5     |
| H5AB-C5A-H5AC | 109.5       | H5CB-C5C-H5CC | 109.5     |
| O4A-C6A-O5A   | 124.28 (17) | O4C-C6C-O5C   | 124.2 (2) |
| O4A-C6A-C3A   | 124.60 (17) | O4C-C6C-C3C   | 124.5 (2) |
| O5A-C6A-C3A   | 111.12 (15) | O5C-C6C-C3C   | 111.1 (2) |
| O5A-C7A-C8A   | 110.52 (17) | O5C-C7C-C8C   | 110.5 (2) |
| O5A-C7A-H7AA  | 109.5       | O5C-C7C-H7CA  | 109.5     |
| C8A-C7A-H7AA  | 109.5       | C8C-C7C-H7CA  | 109.5     |
| O5A-C7A-H7AB  | 109.5       | O5C-C7C-H7CB  | 109.5     |
| C8A-C7A-H7AB  | 109.5       | C8C-C7C-H7CB  | 109.5     |
| H7AA-C7A-H7AB | 108.1       | H7CA-C7C-H7CB | 108.1     |
| C7A-C8A-C9A   | 112.89 (18) | C7C-C8C-C9C   | 112.9 (2) |
| C7A-C8A-H8AA  | 109.0       | C7C-C8C-H8CA  | 109.0     |
| C9A-C8A-H8AA  | 109.0       | C9C-C8C-H8CA  | 109.0     |
| C7A-C8A-H8AB  | 109.0       | C7C-C8C-H8CB  | 109.0     |
| C9A-C8A-H8AB  | 109.0       | C9C-C8C-H8CB  | 109.0     |
| H8AA-C8A-H8AB | 107.8       | H8CA-C8C-H8CB | 107.8     |
| O6A-C9A-C8A   | 108.15 (16) | O6C-C9C-C8C   | 108.1 (2) |
| O6A-C9A-H9AA  | 110.1       | O6C-C9C-H9CA  | 110.1     |
| C8A-C9A-H9AA  | 110.1       | C8C-C9C-H9CA  | 110.1     |
| O6A-C9A-H9AB  | 110.1       | O6C-C9C-H9CB  | 110.1     |
| C8A-C9A-H9AB  | 110.1       | C8C-C9C-H9CB  | 110.1     |
| H9AA-C9A-H9AB | 108.4       | H9CA-C9C-H9CB | 108.4     |
| O6A-C10A-C11A | 107.72 (14) | O6C-C10C-C11C | 107.7 (2) |

|                |             |                |             |
|----------------|-------------|----------------|-------------|
| O6A-C10A-H10A  | 110.2       | O6C-C10C-H10E  | 110.2       |
| C11A-C10A-H10A | 110.2       | C11C-C10C-H10E | 110.2       |
| O6A-C10A-H10B  | 110.2       | O6C-C10C-H10F  | 110.2       |
| C11A-C10A-H10B | 110.2       | C11C-C10C-H10F | 110.2       |
| H10A-C10A-H10B | 108.5       | H10E-C10C-H10F | 108.5       |
| C12A-C11A-C15A | 107.64 (16) | C12C-C11C-C15C | 107.65 (18) |
| C12A-C11A-C10A | 126.92 (18) | C12C-C11C-C10C | 126.9 (2)   |
| C15A-C11A-C10A | 125.39 (19) | C15C-C11C-C10C | 125.4 (2)   |
| C12A-C11A-Fe1A | 69.54 (10)  | C12C-C11C-Fe1C | 69.54 (11)  |
| C15A-C11A-Fe1A | 69.41 (10)  | C15C-C11C-Fe1C | 69.41 (11)  |
| C10A-C11A-Fe1A | 128.41 (13) | C10C-C11C-Fe1C | 128.28 (19) |
| C11A-C12A-C13A | 108.20 (17) | C11C-C12C-C13C | 108.20 (19) |
| C11A-C12A-Fe1A | 69.44 (10)  | C11C-C12C-Fe1C | 69.44 (10)  |
| C13A-C12A-Fe1A | 69.58 (10)  | C13C-C12C-Fe1C | 69.57 (11)  |
| C11A-C12A-H12A | 125.9       | C11C-C12C-H12C | 125.9       |
| C13A-C12A-H12A | 125.9       | C13C-C12C-H12C | 125.9       |
| Fe1A-C12A-H12A | 125.9       | Fe1C-C12C-H12C | 125.9       |
| C14A-C13A-C12A | 108.21 (17) | C14C-C13C-C12C | 108.21 (19) |
| C14A-C13A-Fe1A | 69.91 (11)  | C14C-C13C-Fe1C | 69.91 (12)  |
| C12A-C13A-Fe1A | 69.31 (10)  | C12C-C13C-Fe1C | 69.31 (11)  |
| C14A-C13A-H13A | 125.9       | C14C-C13C-H13C | 125.9       |
| C12A-C13A-H13A | 125.9       | C12C-C13C-H13C | 125.9       |
| Fe1A-C13A-H13A | 125.9       | Fe1C-C13C-H13C | 125.9       |
| C13A-C14A-C15A | 107.49 (17) | C13C-C14C-C15C | 107.50 (19) |
| C13A-C14A-Fe1A | 69.19 (11)  | C13C-C14C-Fe1C | 69.19 (12)  |
| C15A-C14A-Fe1A | 68.93 (11)  | C15C-C14C-Fe1C | 68.93 (12)  |
| C13A-C14A-H14A | 126.2       | C13C-C14C-H14C | 126.2       |
| C15A-C14A-H14A | 126.2       | C15C-C14C-H14C | 126.2       |
| Fe1A-C14A-H14A | 126.2       | Fe1C-C14C-H14C | 126.2       |
| C11A-C15A-C14A | 108.45 (18) | C11C-C15C-C14C | 108.4 (2)   |
| C11A-C15A-Fe1A | 69.40 (10)  | C11C-C15C-Fe1C | 69.40 (11)  |
| C14A-C15A-Fe1A | 70.02 (11)  | C14C-C15C-Fe1C | 70.01 (12)  |
| C11A-C15A-H15A | 125.8       | C11C-C15C-H15C | 125.8       |
| C14A-C15A-H15A | 125.8       | C14C-C15C-H15C | 125.8       |
| Fe1A-C15A-H15A | 125.8       | Fe1C-C15C-H15C | 125.8       |
| C17A-C16A-C20A | 107.8 (2)   | C17C-C16C-C20C | 107.8 (2)   |
| C17A-C16A-Fe1A | 69.78 (11)  | C17C-C16C-Fe1C | 69.78 (12)  |

|                |             |                |             |
|----------------|-------------|----------------|-------------|
| C20A-C16A-Fe1A | 69.82 (13)  | C20C-C16C-Fe1C | 69.82 (13)  |
| C17A-C16A-H16A | 126.1       | C17C-C16C-H16C | 126.1       |
| C20A-C16A-H16A | 126.1       | C20C-C16C-H16C | 126.1       |
| Fe1A-C16A-H16A | 126.1       | Fe1C-C16C-H16C | 126.1       |
| C16A-C17A-C18A | 108.37 (19) | C16C-C17C-C18C | 108.4 (2)   |
| C16A-C17A-Fe1A | 69.77 (11)  | C16C-C17C-Fe1C | 69.77 (12)  |
| C18A-C17A-Fe1A | 69.62 (11)  | C18C-C17C-Fe1C | 69.62 (12)  |
| C16A-C17A-H17A | 125.8       | C16C-C17C-H17C | 125.8       |
| C18A-C17A-H17A | 125.8       | C18C-C17C-H17C | 125.8       |
| Fe1A-C17A-H17A | 125.8       | Fe1C-C17C-H17C | 125.8       |
| C19A-C18A-C17A | 108.24 (19) | C19C-C18C-C17C | 108.2 (2)   |
| C19A-C18A-Fe1A | 69.93 (11)  | C19C-C18C-Fe1C | 69.93 (12)  |
| C17A-C18A-Fe1A | 69.63 (11)  | C17C-C18C-Fe1C | 69.63 (11)  |
| C19A-C18A-H18A | 125.9       | C19C-C18C-H18C | 125.9       |
| C17A-C18A-H18A | 125.9       | C17C-C18C-H18C | 125.9       |
| Fe1A-C18A-H18A | 125.9       | Fe1C-C18C-H18C | 125.9       |
| C18A-C19A-C20A | 107.3 (2)   | C18C-C19C-C20C | 107.3 (2)   |
| C18A-C19A-Fe1A | 69.50 (10)  | C18C-C19C-Fe1C | 69.49 (11)  |
| C20A-C19A-Fe1A | 69.49 (12)  | C20C-C19C-Fe1C | 69.50 (12)  |
| C18A-C19A-H19A | 126.3       | C18C-C19C-H19C | 126.3       |
| C20A-C19A-H19A | 126.3       | C20C-C19C-H19C | 126.3       |
| Fe1A-C19A-H19A | 126.3       | Fe1C-C19C-H19C | 126.3       |
| C16A-C20A-C19A | 108.3 (2)   | C16C-C20C-C19C | 108.3 (2)   |
| C16A-C20A-Fe1A | 69.50 (12)  | C16C-C20C-Fe1C | 69.51 (13)  |
| C19A-C20A-Fe1A | 69.61 (12)  | C19C-C20C-Fe1C | 69.60 (13)  |
| C16A-C20A-H20A | 125.9       | C16C-C20C-H20C | 125.9       |
| C19A-C20A-H20A | 125.9       | C19C-C20C-H20C | 125.9       |
| Fe1A-C20A-H20A | 125.9       | Fe1C-C20C-H20C | 125.9       |
| C11B-Fe1B-C19B | 159.91 (8)  | C11D-Fe1D-C15D | 41.18 (9)   |
| C11B-Fe1B-C15B | 41.25 (7)   | C11D-Fe1D-C12D | 41.02 (8)   |
| C19B-Fe1B-C15B | 122.71 (8)  | C15D-Fe1D-C12D | 69.03 (9)   |
| C11B-Fe1B-C18B | 158.17 (8)  | C11D-Fe1D-C13D | 69.23 (9)   |
| C19B-Fe1B-C18B | 40.59 (8)   | C15D-Fe1D-C13D | 68.98 (9)   |
| C15B-Fe1B-C18B | 159.24 (8)  | C12D-Fe1D-C13D | 41.12 (8)   |
| C11B-Fe1B-C12B | 40.95 (7)   | C11D-Fe1D-C18D | 158.35 (11) |
| C19B-Fe1B-C12B | 157.49 (8)  | C15D-Fe1D-C18D | 159.28 (11) |
| C15B-Fe1B-C12B | 69.14 (8)   | C12D-Fe1D-C18D | 122.43 (11) |

|                |             |                |             |
|----------------|-------------|----------------|-------------|
| C18B-Fe1B-C12B | 122.12 (8)  | C13D-Fe1D-C18D | 107.30 (10) |
| C11B-Fe1B-C20B | 123.42 (7)  | C11D-Fe1D-C16D | 106.53 (10) |
| C19B-Fe1B-C20B | 40.97 (8)   | C15D-Fe1D-C16D | 122.46 (11) |
| C15B-Fe1B-C20B | 106.86 (8)  | C12D-Fe1D-C16D | 122.08 (11) |
| C18B-Fe1B-C20B | 68.48 (8)   | C13D-Fe1D-C16D | 158.61 (12) |
| C12B-Fe1B-C20B | 160.23 (8)  | C18D-Fe1D-C16D | 68.49 (10)  |
| C11B-Fe1B-C14B | 68.99 (7)   | C11D-Fe1D-C17D | 121.92 (11) |
| C19B-Fe1B-C14B | 106.56 (8)  | C15D-Fe1D-C17D | 158.41 (12) |
| C15B-Fe1B-C14B | 40.87 (7)   | C12D-Fe1D-C17D | 106.91 (10) |
| C18B-Fe1B-C14B | 122.98 (8)  | C13D-Fe1D-C17D | 122.76 (11) |
| C12B-Fe1B-C14B | 68.88 (8)   | C18D-Fe1D-C17D | 40.75 (9)   |
| C20B-Fe1B-C14B | 121.56 (9)  | C16D-Fe1D-C17D | 40.45 (9)   |
| C11B-Fe1B-C17B | 122.32 (8)  | C11D-Fe1D-C20D | 122.54 (12) |
| C19B-Fe1B-C17B | 68.58 (8)   | C15D-Fe1D-C20D | 107.54 (12) |
| C15B-Fe1B-C17B | 158.30 (8)  | C12D-Fe1D-C20D | 158.61 (12) |
| C18B-Fe1B-C17B | 40.71 (8)   | C13D-Fe1D-C20D | 159.15 (13) |
| C12B-Fe1B-C17B | 107.65 (8)  | C18D-Fe1D-C20D | 68.28 (11)  |
| C20B-Fe1B-C17B | 68.51 (8)   | C16D-Fe1D-C20D | 40.68 (11)  |
| C14B-Fe1B-C17B | 159.75 (8)  | C17D-Fe1D-C20D | 68.09 (11)  |
| C11B-Fe1B-C13B | 68.70 (8)   | C11D-Fe1D-C19D | 159.24 (12) |
| C19B-Fe1B-C13B | 121.41 (8)  | C15D-Fe1D-C19D | 123.00 (11) |
| C15B-Fe1B-C13B | 68.51 (8)   | C12D-Fe1D-C19D | 158.65 (12) |
| C18B-Fe1B-C13B | 107.52 (8)  | C13D-Fe1D-C19D | 122.53 (11) |
| C12B-Fe1B-C13B | 40.97 (8)   | C18D-Fe1D-C19D | 40.57 (9)   |
| C20B-Fe1B-C13B | 157.26 (9)  | C16D-Fe1D-C19D | 68.81 (10)  |
| C14B-Fe1B-C13B | 40.45 (9)   | C17D-Fe1D-C19D | 68.48 (9)   |
| C17B-Fe1B-C13B | 124.00 (9)  | C20D-Fe1D-C19D | 40.90 (11)  |
| C11B-Fe1B-C16B | 107.71 (7)  | C11D-Fe1D-C14D | 69.34 (9)   |
| C19B-Fe1B-C16B | 68.51 (8)   | C15D-Fe1D-C14D | 41.06 (10)  |
| C15B-Fe1B-C16B | 122.05 (8)  | C12D-Fe1D-C14D | 69.10 (9)   |
| C18B-Fe1B-C16B | 68.40 (8)   | C13D-Fe1D-C14D | 40.90 (10)  |
| C12B-Fe1B-C16B | 124.06 (8)  | C18D-Fe1D-C14D | 122.88 (11) |
| C20B-Fe1B-C16B | 40.48 (8)   | C16D-Fe1D-C14D | 159.03 (13) |
| C14B-Fe1B-C16B | 157.59 (9)  | C17D-Fe1D-C14D | 159.13 (12) |
| C17B-Fe1B-C16B | 40.78 (8)   | C20D-Fe1D-C14D | 123.05 (13) |
| C13B-Fe1B-C16B | 160.83 (9)  | C19D-Fe1D-C14D | 107.38 (10) |
| C1B-O1B-C2B    | 124.25 (15) | C1D-O1D-C2D    | 123.6 (2)   |

|               |             |               |             |
|---------------|-------------|---------------|-------------|
| C1B-O3B-C4B   | 119.94 (15) | C1D-O3D-C4D   | 120.0 (2)   |
| C6B-O5B-C7B   | 116.98 (16) | C6D-O5D-C7D   | 116.1 (2)   |
| C9B-O6B-C10B  | 111.22 (14) | C9D-O6D-C10D  | 111.6 (2)   |
| O2B-C1B-O1B   | 120.81 (19) | O2D-C1D-O1D   | 120.8 (3)   |
| O2B-C1B-O3B   | 120.34 (19) | O2D-C1D-O3D   | 119.5 (3)   |
| O1B-C1B-O3B   | 118.83 (16) | O1D-C1D-O3D   | 119.5 (2)   |
| O1B-C2B-C3B   | 112.70 (14) | O1D-C2D-C3D   | 113.4 (2)   |
| O1B-C2B-H2BA  | 109.1       | O1D-C2D-H2DA  | 108.9       |
| C3B-C2B-H2BA  | 109.1       | C3D-C2D-H2DA  | 108.9       |
| O1B-C2B-H2BB  | 109.1       | O1D-C2D-H2DB  | 108.9       |
| C3B-C2B-H2BB  | 109.1       | C3D-C2D-H2DB  | 108.9       |
| H2BA-C2B-H2BB | 107.8       | H2DA-C2D-H2DB | 107.7       |
| C2B-C3B-C4B   | 105.63 (14) | C4D-C3D-C2D   | 105.98 (19) |
| C2B-C3B-C6B   | 110.52 (15) | C4D-C3D-C6D   | 109.78 (19) |
| C4B-C3B-C6B   | 110.02 (14) | C2D-C3D-C6D   | 110.0 (2)   |
| C2B-C3B-C5B   | 109.94 (14) | C4D-C3D-C5D   | 110.1 (2)   |
| C4B-C3B-C5B   | 109.55 (15) | C2D-C3D-C5D   | 110.2 (2)   |
| C6B-C3B-C5B   | 111.04 (14) | C6D-C3D-C5D   | 110.7 (2)   |
| O3B-C4B-C3B   | 109.67 (14) | O3D-C4D-C3D   | 109.8 (2)   |
| O3B-C4B-H4BA  | 109.7       | O3D-C4D-H4DA  | 109.7       |
| C3B-C4B-H4BA  | 109.7       | C3D-C4D-H4DA  | 109.7       |
| O3B-C4B-H4BB  | 109.7       | O3D-C4D-H4DB  | 109.7       |
| C3B-C4B-H4BB  | 109.7       | C3D-C4D-H4DB  | 109.7       |
| H4BA-C4B-H4BB | 108.2       | H4DA-C4D-H4DB | 108.2       |
| C3B-C5B-H5BA  | 109.5       | C3D-C5D-H5DA  | 109.5       |
| C3B-C5B-H5BB  | 109.5       | C3D-C5D-H5DB  | 109.5       |
| H5BA-C5B-H5BB | 109.5       | H5DA-C5D-H5DB | 109.5       |
| C3B-C5B-H5BC  | 109.5       | C3D-C5D-H5DC  | 109.5       |
| H5BA-C5B-H5BC | 109.5       | H5DA-C5D-H5DC | 109.5       |
| H5BB-C5B-H5BC | 109.5       | H5DB-C5D-H5DC | 109.5       |
| O4B-C6B-O5B   | 123.94 (17) | O4D-C6D-O5D   | 124.2 (3)   |
| O4B-C6B-C3B   | 124.63 (16) | O4D-C6D-C3D   | 124.5 (3)   |
| O5B-C6B-C3B   | 111.42 (15) | O5D-C6D-C3D   | 111.0 (2)   |
| O5B-C7B-C8B   | 110.52 (16) | O5D-C7D-C8D   | 110.5 (2)   |
| O5B-C7B-H7BA  | 109.5       | O5D-C7D-H7DA  | 109.5       |
| C8B-C7B-H7BA  | 109.5       | C8D-C7D-H7DA  | 109.5       |
| O5B-C7B-H7BB  | 109.5       | O5D-C7D-H7DB  | 109.5       |

|                |             |                |             |
|----------------|-------------|----------------|-------------|
| C8B–C7B–H7BB   | 109.5       | C8D–C7D–H7DB   | 109.5       |
| H7BA–C7B–H7BB  | 108.1       | H7DA–C7D–H7DB  | 108.1       |
| C7B–C8B–C9B    | 112.56 (17) | C7D–C8D–C9D    | 112.9 (2)   |
| C7B–C8B–H8BA   | 109.1       | C7D–C8D–H8DA   | 109.0       |
| C9B–C8B–H8BA   | 109.1       | C9D–C8D–H8DA   | 109.0       |
| C7B–C8B–H8BB   | 109.1       | C7D–C8D–H8DB   | 109.0       |
| C9B–C8B–H8BB   | 109.1       | C9D–C8D–H8DB   | 109.0       |
| H8BA–C8B–H8BB  | 107.8       | H8DA–C8D–H8DB  | 107.8       |
| O6B–C9B–C8B    | 107.97 (16) | O6D–C9D–C8D    | 108.1 (2)   |
| O6B–C9B–H9BA   | 110.1       | O6D–C9D–H9DA   | 110.1       |
| C8B–C9B–H9BA   | 110.1       | C8D–C9D–H9DA   | 110.1       |
| O6B–C9B–H9BB   | 110.1       | O6D–C9D–H9DB   | 110.1       |
| C8B–C9B–H9BB   | 110.1       | C8D–C9D–H9DB   | 110.1       |
| H9BA–C9B–H9BB  | 108.4       | H9DA–C9D–H9DB  | 108.4       |
| O6B–C10B–C11B  | 107.65 (14) | O6D–C10D–C11D  | 107.7 (2)   |
| O6B–C10B–H10C  | 110.2       | O6D–C10D–H10G  | 110.2       |
| C11B–C10B–H10C | 110.2       | C11D–C10D–H10G | 110.2       |
| O6B–C10B–H10D  | 110.2       | O6D–C10D–H10H  | 110.2       |
| C11B–C10B–H10D | 110.2       | C11D–C10D–H10H | 110.2       |
| H10C–C10B–H10D | 108.5       | H10G–C10D–H10H | 108.5       |
| C12B–C11B–C15B | 108.10 (16) | C12D–C11D–C15D | 107.65 (18) |
| C12B–C11B–C10B | 125.84 (18) | C12D–C11D–C10D | 126.9 (2)   |
| C15B–C11B–C10B | 126.04 (17) | C15D–C11D–C10D | 125.4 (2)   |
| C12B–C11B–Fe1B | 69.89 (10)  | C12D–C11D–Fe1D | 69.54 (11)  |
| C15B–C11B–Fe1B | 69.51 (9)   | C15D–C11D–Fe1D | 69.41 (11)  |
| C10B–C11B–Fe1B | 127.58 (13) | C10D–C11D–Fe1D | 128.4 (2)   |
| C11B–C12B–C13B | 107.43 (17) | C11D–C12D–C13D | 108.20 (19) |
| C11B–C12B–Fe1B | 69.15 (10)  | C11D–C12D–Fe1D | 69.44 (10)  |
| C13B–C12B–Fe1B | 69.78 (11)  | C13D–C12D–Fe1D | 69.57 (11)  |
| C11B–C12B–H12B | 126.3       | C11D–C12D–H12D | 125.9       |
| C13B–C12B–H12B | 126.3       | C13D–C12D–H12D | 125.9       |
| Fe1B–C12B–H12B | 126.3       | Fe1D–C12D–H12D | 125.9       |
| C14B–C13B–C12B | 108.60 (17) | C14D–C13D–C12D | 108.2 (2)   |
| C14B–C13B–Fe1B | 69.71 (11)  | C14D–C13D–Fe1D | 69.91 (12)  |
| C12B–C13B–Fe1B | 69.25 (11)  | C12D–C13D–Fe1D | 69.31 (11)  |
| C14B–C13B–H13B | 125.7       | C14D–C13D–H13D | 125.9       |
| C12B–C13B–H13B | 125.7       | C12D–C13D–H13D | 125.9       |

|                |             |                |             |
|----------------|-------------|----------------|-------------|
| Fe1B–C13B–H13B | 125.7       | Fe1D–C13D–H13D | 125.9       |
| C13B–C14B–C15B | 108.02 (16) | C13D–C14D–C15D | 107.49 (19) |
| C13B–C14B–Fe1B | 69.84 (11)  | C13D–C14D–Fe1D | 69.19 (12)  |
| C15B–C14B–Fe1B | 69.13 (10)  | C15D–C14D–Fe1D | 68.93 (12)  |
| C13B–C14B–H14B | 126.0       | C13D–C14D–H14D | 126.2       |
| C15B–C14B–H14B | 126.0       | C15D–C14D–H14D | 126.2       |
| Fe1B–C14B–H14B | 126.0       | Fe1D–C14D–H14D | 126.2       |
| C14B–C15B–C11B | 107.85 (16) | C11D–C15D–C14D | 108.4 (2)   |
| C14B–C15B–Fe1B | 70.00 (10)  | C11D–C15D–Fe1D | 69.41 (11)  |
| C11B–C15B–Fe1B | 69.24 (9)   | C14D–C15D–Fe1D | 70.01 (12)  |
| C14B–C15B–H15B | 126.1       | C11D–C15D–H15D | 125.8       |
| C11B–C15B–H15B | 126.1       | C14D–C15D–H15D | 125.8       |
| Fe1B–C15B–H15B | 126.1       | Fe1D–C15D–H15D | 125.8       |
| C20B–C16B–C17B | 108.17 (17) | C17D–C16D–C20D | 107.8 (2)   |
| C20B–C16B–Fe1B | 69.52 (10)  | C17D–C16D–Fe1D | 69.78 (12)  |
| C17B–C16B–Fe1B | 69.56 (11)  | C20D–C16D–Fe1D | 69.82 (13)  |
| C20B–C16B–H16B | 125.9       | C17D–C16D–H16D | 126.1       |
| C17B–C16B–H16B | 125.9       | C20D–C16D–H16D | 126.1       |
| Fe1B–C16B–H16B | 125.9       | Fe1D–C16D–H16D | 126.1       |
| C18B–C17B–C16B | 107.54 (17) | C16D–C17D–C18D | 108.4 (2)   |
| C18B–C17B–Fe1B | 69.36 (11)  | C16D–C17D–Fe1D | 69.77 (12)  |
| C16B–C17B–Fe1B | 69.66 (11)  | C18D–C17D–Fe1D | 69.62 (12)  |
| C18B–C17B–H17B | 126.2       | C16D–C17D–H17D | 125.8       |
| C16B–C17B–H17B | 126.2       | C18D–C17D–H17D | 125.8       |
| Fe1B–C17B–H17B | 126.2       | Fe1D–C17D–H17D | 125.8       |
| C19B–C18B–C17B | 108.39 (17) | C19D–C18D–C17D | 108.2 (2)   |
| C19B–C18B–Fe1B | 69.45 (10)  | C19D–C18D–Fe1D | 69.93 (12)  |
| C17B–C18B–Fe1B | 69.93 (10)  | C17D–C18D–Fe1D | 69.63 (11)  |
| C19B–C18B–H18B | 125.8       | C19D–C18D–H18D | 125.9       |
| C17B–C18B–H18B | 125.8       | C17D–C18D–H18D | 125.9       |
| Fe1B–C18B–H18B | 125.8       | Fe1D–C18D–H18D | 125.9       |
| C18B–C19B–C20B | 107.98 (17) | C18D–C19D–C20D | 107.3 (2)   |
| C18B–C19B–Fe1B | 69.96 (10)  | C18D–C19D–Fe1D | 69.49 (11)  |
| C20B–C19B–Fe1B | 69.86 (10)  | C20D–C19D–Fe1D | 69.50 (12)  |
| C18B–C19B–H19B | 126.0       | C18D–C19D–H19D | 126.3       |
| C20B–C19B–H19B | 126.0       | C20D–C19D–H19D | 126.3       |
| Fe1B–C19B–H19B | 126.0       | Fe1D–C19D–H19D | 126.3       |

|                     |              |                     |             |
|---------------------|--------------|---------------------|-------------|
| C16B–C20B–C19B      | 107.91 (17)  | C16D–C20D–C19D      | 108.3 (2)   |
| C16B–C20B–Fe1B      | 70.00 (11)   | C16D–C20D–Fe1D      | 69.50 (13)  |
| C19B–C20B–Fe1B      | 69.17 (10)   | C19D–C20D–Fe1D      | 69.60 (13)  |
| C16B–C20B–H20B      | 126.0        | C16D–C20D–H20D      | 125.9       |
| C19B–C20B–H20B      | 126.0        | C19D–C20D–H20D      | 125.9       |
| Fe1B–C20B–H20B      | 126.0        | Fe1D–C20D–H20D      | 125.9       |
|                     |              |                     |             |
| C2A–O1A–C1A–O2A     | 174.1 (2)    | C2C–O1C–C1C–O2C     | -173.8 (19) |
| C2A–O1A–C1A–O3A     | -5.7 (3)     | C2C–O1C–C1C–O3C     | 8 (3)       |
| C4A–O3A–C1A–O2A     | 170.2 (2)    | C4C–O3C–C1C–O2C     | -170 (2)    |
| C4A–O3A–C1A–O1A     | -10.1 (3)    | C4C–O3C–C1C–O1C     | 8 (3)       |
| C1A–O1A–C2A–C3A     | -14.3 (3)    | C1C–O1C–C2C–C3C     | 12 (2)      |
| O1A–C2A–C3A–C4A     | 45.2 (2)     | O1C–C2C–C3C–C4C     | -44.8 (8)   |
| O1A–C2A–C3A–C6A     | -73.4 (2)    | O1C–C2C–C3C–C6C     | 73.8 (8)    |
| O1A–C2A–C3A–C5A     | 164.24 (17)  | O1C–C2C–C3C–C5C     | -163.8 (8)  |
| C1A–O3A–C4A–C3A     | 44.1 (3)     | C1C–O3C–C4C–C3C     | -43.4 (10)  |
| C2A–C3A–C4A–O3A     | -58.75 (19)  | C2C–C3C–C4C–O3C     | 58.9 (4)    |
| C6A–C3A–C4A–O3A     | 60.0 (2)     | C6C–C3C–C4C–O3C     | -59.9 (4)   |
| C5A–C3A–C4A–O3A     | -177.88 (15) | C5C–C3C–C4C–O3C     | 178.0 (4)   |
| C7A–O5A–C6A–O4A     | 0.6 (3)      | C7C–O5C–C6C–O4C     | 2 (2)       |
| C7A–O5A–C6A–C3A     | -178.33 (16) | C7C–O5C–C6C–C3C     | 176.2 (6)   |
| C4A–C3A–C6A–O4A     | -114.7 (2)   | C4C–C3C–C6C–O4C     | 111.3 (17)  |
| C2A–C3A–C6A–O4A     | 1.5 (3)      | C2C–C3C–C6C–O4C     | -5.0 (17)   |
| C5A–C3A–C6A–O4A     | 123.5 (2)    | C5C–C3C–C6C–O4C     | -127.0 (17) |
| C4A–C3A–C6A–O5A     | 64.2 (2)     | C4C–C3C–C6C–O5C     | -63.4 (10)  |
| C2A–C3A–C6A–O5A     | -179.60 (16) | C2C–C3C–C6C–O5C     | -179.7 (10) |
| C5A–C3A–C6A–O5A     | -57.5 (2)    | C5C–C3C–C6C–O5C     | 58.3 (10)   |
| C6A–O5A–C7A–C8A     | 84.3 (2)     | C6C–O5C–C7C–C8C     | -83.3 (12)  |
| O5A–C7A–C8A–C9A     | 174.94 (17)  | O5C–C7C–C8C–C9C     | -174.1 (5)  |
| C10A–O6A–C9A–C8A    | -176.65 (17) | C10C–O6C–C9C–C8C    | 177.9 (10)  |
| C7A–C8A–C9A–O6A     | -77.4 (2)    | C7C–C8C–C9C–O6C     | 74.3 (11)   |
| C9A–O6A–C10A–C11A   | 173.50 (18)  | C9C–O6C–C10C–C11C   | -173.8 (11) |
| O6A–C10A–C11A–C12A  | -95.9 (2)    | O6C–C10C–C11C–C12C  | 96.0 (10)   |
| O6A–C10A–C11A–C15A  | 81.2 (2)     | O6C–C10C–C11C–C15C  | -81.3 (10)  |
| O6A–C10A–C11A–Fe1A  | 171.93 (14)  | O6C–C10C–C11C–Fe1C  | -171.9 (10) |
| C15A–C11A–C12A–C13A | 0.21 (19)    | C15C–C11C–C12C–C13C | -0.2 (2)    |
| C10A–C11A–C12A–C13A | 177.73 (16)  | C10C–C11C–C12C–C13C | -177.9 (3)  |



|                     |              |                     |             |
|---------------------|--------------|---------------------|-------------|
| Fe1A-C11A-C12A-C13A | -58.96 (12)  | Fe1C-C11C-C12C-C13C | 58.96 (14)  |
| C15A-C11A-C12A-Fe1A | 59.17 (12)   | C15C-C11C-C12C-Fe1C | -59.17 (13) |
| C10A-C11A-C12A-Fe1A | -123.31 (18) | C10C-C11C-C12C-Fe1C | 123.1 (3)   |
| C11A-C12A-C13A-C14A | -0.4 (2)     | C11C-C12C-C13C-C14C | 0.4 (2)     |
| Fe1A-C12A-C13A-C14A | -59.28 (13)  | Fe1C-C12C-C13C-C14C | 59.28 (14)  |
| C11A-C12A-C13A-Fe1A | 58.87 (12)   | C11C-C12C-C13C-Fe1C | -58.87 (13) |
| C12A-C13A-C14A-C15A | 0.4 (2)      | C12C-C13C-C14C-C15C | -0.4 (2)    |
| Fe1A-C13A-C14A-C15A | -58.46 (13)  | Fe1C-C13C-C14C-C15C | 58.46 (15)  |
| C12A-C13A-C14A-Fe1A | 58.91 (12)   | C12C-C13C-C14C-Fe1C | -58.91 (14) |
| C12A-C11A-C15A-C14A | 0.1 (2)      | C12C-C11C-C15C-C14C | -0.1 (2)    |
| C10A-C11A-C15A-C14A | -177.50 (16) | C10C-C11C-C15C-C14C | 177.7 (2)   |
| Fe1A-C11A-C15A-C14A | 59.32 (13)   | Fe1C-C11C-C15C-C14C | -59.31 (15) |
| C12A-C11A-C15A-Fe1A | -59.26 (12)  | C12C-C11C-C15C-Fe1C | 59.25 (13)  |
| C10A-C11A-C15A-Fe1A | 123.18 (17)  | C10C-C11C-C15C-Fe1C | -123.0 (2)  |
| C13A-C14A-C15A-C11A | -0.3 (2)     | C13C-C14C-C15C-C11C | 0.3 (2)     |
| Fe1A-C14A-C15A-C11A | -58.94 (13)  | Fe1C-C14C-C15C-C11C | 58.94 (14)  |
| C13A-C14A-C15A-Fe1A | 58.63 (13)   | C13C-C14C-C15C-Fe1C | -58.63 (15) |
| C20A-C16A-C17A-C18A | -0.6 (2)     | C20C-C16C-C17C-C18C | 0.6 (2)     |
| Fe1A-C16A-C17A-C18A | 59.10 (13)   | Fe1C-C16C-C17C-C18C | -59.10 (15) |
| C20A-C16A-C17A-Fe1A | -59.73 (14)  | C20C-C16C-C17C-Fe1C | 59.72 (16)  |
| C16A-C17A-C18A-C19A | 0.3 (2)      | C16C-C17C-C18C-C19C | -0.3 (2)    |
| Fe1A-C17A-C18A-C19A | 59.48 (13)   | Fe1C-C17C-C18C-C19C | -59.49 (15) |
| C16A-C17A-C18A-Fe1A | -59.19 (13)  | C16C-C17C-C18C-Fe1C | 59.20 (15)  |
| C17A-C18A-C19A-C20A | 0.2 (2)      | C17C-C18C-C19C-C20C | -0.2 (2)    |
| Fe1A-C18A-C19A-C20A | 59.45 (14)   | Fe1C-C18C-C19C-C20C | -59.45 (15) |
| C17A-C18A-C19A-Fe1A | -59.29 (13)  | C17C-C18C-C19C-Fe1C | 59.30 (15)  |
| C17A-C16A-C20A-C19A | 0.7 (2)      | C17C-C16C-C20C-C19C | -0.7 (3)    |
| Fe1A-C16A-C20A-C19A | -58.97 (15)  | Fe1C-C16C-C20C-C19C | 58.98 (16)  |
| C17A-C16A-C20A-Fe1A | 59.70 (14)   | C17C-C16C-C20C-Fe1C | -59.69 (15) |
| C18A-C19A-C20A-C16A | -0.5 (2)     | C18C-C19C-C20C-C16C | 0.5 (3)     |
| Fe1A-C19A-C20A-C16A | 58.91 (14)   | Fe1C-C19C-C20C-C16C | -58.92 (16) |
| C18A-C19A-C20A-Fe1A | -59.45 (14)  | C18C-C19C-C20C-Fe1C | 59.45 (15)  |
| C2B-O1B-C1B-O2B     | 172.5 (2)    | C2D-O1D-C1D-O2D     | -174 (2)    |
| C2B-O1B-C1B-O3B     | -6.0 (3)     | C2D-O1D-C1D-O3D     | 2 (3)       |
| C4B-O3B-C1B-O2B     | 171.36 (19)  | C4D-O3D-C1D-O2D     | -171 (2)    |
| C4B-O3B-C1B-O1B     | -10.1 (3)    | C4D-O3D-C1D-O1D     | 13 (3)      |
| C1B-O1B-C2B-C3B     | -14.7 (3)    | C1D-O1D-C2D-C3D     | 17 (2)      |

|                     |              |                     |             |
|---------------------|--------------|---------------------|-------------|
| O1B-C2B-C3B-C4B     | 46.0 (2)     | O1D-C2D-C3D-C4D     | -45.6 (8)   |
| O1B-C2B-C3B-C6B     | -73.0 (2)    | O1D-C2D-C3D-C6D     | 73.1 (8)    |
| O1B-C2B-C3B-C5B     | 164.09 (16)  | O1D-C2D-C3D-C5D     | -164.6 (8)  |
| C1B-O3B-C4B-C3B     | 44.8 (2)     | C1D-O3D-C4D-C3D     | -44.9 (10)  |
| C2B-C3B-C4B-O3B     | -60.17 (18)  | C2D-C3D-C4D-O3D     | 58.4 (4)    |
| C6B-C3B-C4B-O3B     | 59.13 (19)   | C6D-C3D-C4D-O3D     | -60.4 (5)   |
| C5B-C3B-C4B-O3B     | -178.54 (14) | C5D-C3D-C4D-O3D     | 177.5 (4)   |
| C7B-O5B-C6B-O4B     | 0.5 (3)      | C7D-O5D-C6D-O4D     | -14 (3)     |
| C7B-O5B-C6B-C3B     | -178.56 (15) | C7D-O5D-C6D-C3D     | 171.8 (10)  |
| C2B-C3B-C6B-O4B     | 1.5 (3)      | C4D-C3D-C6D-O4D     | 111 (3)     |
| C4B-C3B-C6B-O4B     | -114.8 (2)   | C2D-C3D-C6D-O4D     | -5 (3)      |
| C5B-C3B-C6B-O4B     | 123.8 (2)    | C5D-C3D-C6D-O4D     | -127 (3)    |
| C2B-C3B-C6B-O5B     | -179.50 (15) | C4D-C3D-C6D-O5D     | -74.8 (15)  |
| C4B-C3B-C6B-O5B     | 64.23 (19)   | C2D-C3D-C6D-O5D     | 168.9 (15)  |
| C5B-C3B-C6B-O5B     | -57.2 (2)    | C5D-C3D-C6D-O5D     | 46.9 (15)   |
| C6B-O5B-C7B-C8B     | 84.2 (2)     | C6D-O5D-C7D-C8D     | -100.8 (18) |
| O5B-C7B-C8B-C9B     | 175.91 (17)  | O5D-C7D-C8D-C9D     | -173.1 (7)  |
| C10B-O6B-C9B-C8B    | -177.39 (17) | C10D-O6D-C9D-C8D    | 174.6 (15)  |
| C7B-C8B-C9B-O6B     | -76.3 (2)    | C7D-C8D-C9D-O6D     | 98.2 (16)   |
| C9B-O6B-C10B-C11B   | 174.09 (17)  | C9D-O6D-C10D-C11D   | -169.4 (18) |
| O6B-C10B-C11B-C12B  | 83.0 (2)     | O6D-C10D-C11D-C12D  | -79.7 (15)  |
| O6B-C10B-C11B-C15B  | -95.0 (2)    | O6D-C10D-C11D-C15D  | 97.5 (15)   |
| O6B-C10B-C11B-Fe1B  | 174.21 (13)  | O6D-C10D-C11D-Fe1D  | -171.8 (15) |
| C15B-C11B-C12B-C13B | 0.3 (2)      | C15D-C11D-C12D-C13D | 0.2 (2)     |
| C10B-C11B-C12B-C13B | -178.01 (16) | C10D-C11D-C12D-C13D | 177.8 (3)   |
| Fe1B-C11B-C12B-C13B | 59.52 (13)   | Fe1D-C11D-C12D-C13D | -58.96 (14) |
| C15B-C11B-C12B-Fe1B | -59.22 (12)  | C15D-C11D-C12D-Fe1D | 59.17 (13)  |
| C10B-C11B-C12B-Fe1B | 122.46 (18)  | C10D-C11D-C12D-Fe1D | -123.2 (3)  |
| C11B-C12B-C13B-C14B | -0.4 (2)     | C11D-C12D-C13D-C14D | -0.4 (2)    |
| Fe1B-C12B-C13B-C14B | 58.75 (13)   | Fe1D-C12D-C13D-C14D | -59.28 (14) |
| C11B-C12B-C13B-Fe1B | -59.13 (12)  | C11D-C12D-C13D-Fe1D | 58.87 (13)  |
| C12B-C13B-C14B-C15B | 0.3 (2)      | C12D-C13D-C14D-C15D | 0.4 (2)     |
| Fe1B-C13B-C14B-C15B | 58.77 (12)   | Fe1D-C13D-C14D-C15D | -58.46 (15) |
| C12B-C13B-C14B-Fe1B | -58.47 (13)  | C12D-C13D-C14D-Fe1D | 58.91 (14)  |
| C13B-C14B-C15B-C11B | -0.1 (2)     | C12D-C11D-C15D-C14D | 0.1 (2)     |
| Fe1B-C14B-C15B-C11B | 59.10 (12)   | C10D-C11D-C15D-C14D | -177.6 (3)  |
| C13B-C14B-C15B-Fe1B | -59.21 (13)  | Fe1D-C11D-C15D-C14D | 59.32 (15)  |

|                     |              |                     |             |
|---------------------|--------------|---------------------|-------------|
| C12B-C11B-C15B-C14B | -0.12 (19)   | C12D-C11D-C15D-Fe1D | -59.25 (13) |
| C10B-C11B-C15B-C14B | 178.19 (16)  | C10D-C11D-C15D-Fe1D | 123.1 (3)   |
| Fe1B-C11B-C15B-C14B | -59.58 (12)  | C13D-C14D-C15D-C11D | -0.3 (2)    |
| C12B-C11B-C15B-Fe1B | 59.46 (12)   | Fe1D-C14D-C15D-C11D | -58.94 (14) |
| C10B-C11B-C15B-Fe1B | -122.23 (17) | C13D-C14D-C15D-Fe1D | 58.63 (15)  |
| C20B-C16B-C17B-C18B | -0.3 (2)     | C20D-C16D-C17D-C18D | -0.6 (2)    |
| Fe1B-C16B-C17B-C18B | -59.24 (13)  | Fe1D-C16D-C17D-C18D | 59.10 (15)  |
| C20B-C16B-C17B-Fe1B | 58.98 (13)   | C20D-C16D-C17D-Fe1D | -59.72 (16) |
| C16B-C17B-C18B-C19B | 0.5 (2)      | C16D-C17D-C18D-C19D | 0.3 (2)     |
| Fe1B-C17B-C18B-C19B | -58.98 (13)  | Fe1D-C17D-C18D-C19D | 59.48 (15)  |
| C16B-C17B-C18B-Fe1B | 59.43 (13)   | C16D-C17D-C18D-Fe1D | -59.20 (15) |
| C17B-C18B-C19B-C20B | -0.5 (2)     | C17D-C18D-C19D-C20D | 0.2 (2)     |
| Fe1B-C18B-C19B-C20B | -59.75 (12)  | Fe1D-C18D-C19D-C20D | 59.45 (15)  |
| C17B-C18B-C19B-Fe1B | 59.28 (13)   | C17D-C18D-C19D-Fe1D | -59.30 (15) |
| C17B-C16B-C20B-C19B | 0.0 (2)      | C17D-C16D-C20D-C19D | 0.7 (3)     |
| Fe1B-C16B-C20B-C19B | 58.98 (12)   | Fe1D-C16D-C20D-C19D | -58.98 (16) |
| C17B-C16B-C20B-Fe1B | -59.01 (13)  | C17D-C16D-C20D-Fe1D | 59.69 (15)  |
| C18B-C19B-C20B-C16B | 0.3 (2)      | C18D-C19D-C20D-C16D | -0.5 (3)    |
| Fe1B-C19B-C20B-C16B | -59.50 (13)  | Fe1D-C19D-C20D-C16D | 58.91 (16)  |
| C18B-C19B-C20B-Fe1B | 59.81 (13)   | C18D-C19D-C20D-Fe1D | -59.45 (15) |

## IV. NMR and GPC Spectra of Polymers

### A. Monomer Activation

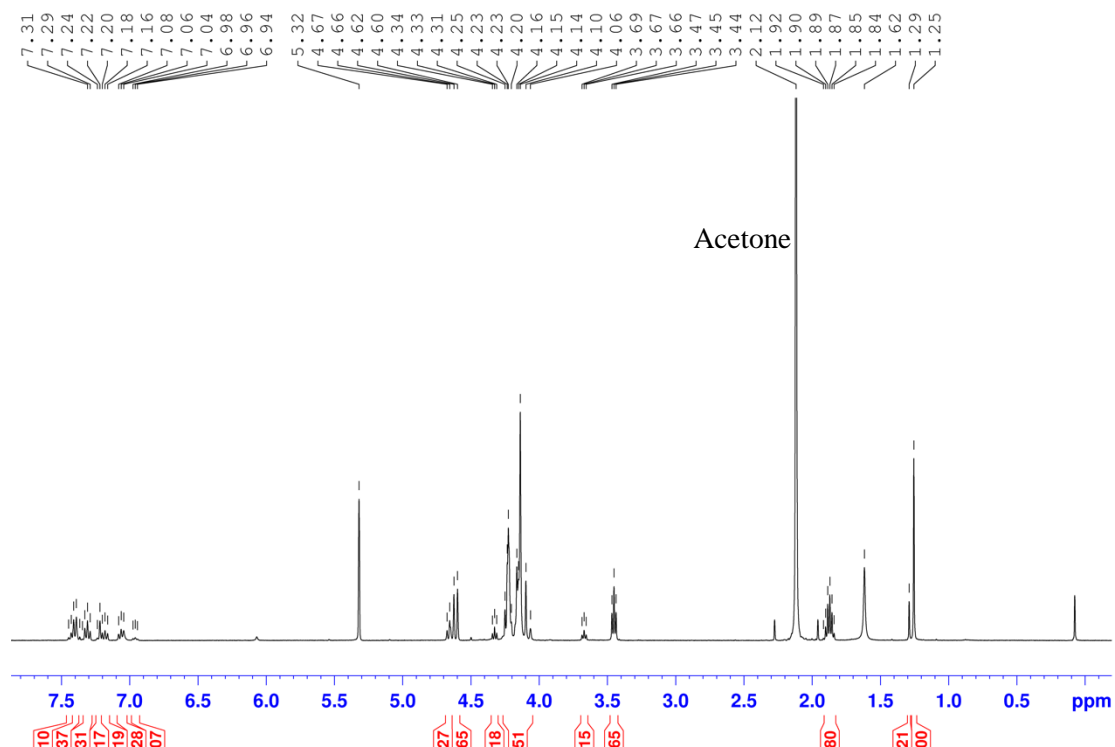

**Figure S21.** The  $^1\text{H}$  NMR spectrum ( $\text{CD}_2\text{Cl}_2$ ) of monomer activation, obtained by mixing a 1:1 molar ratio of monomer **2** and H-bonding catalyst **DPU**.

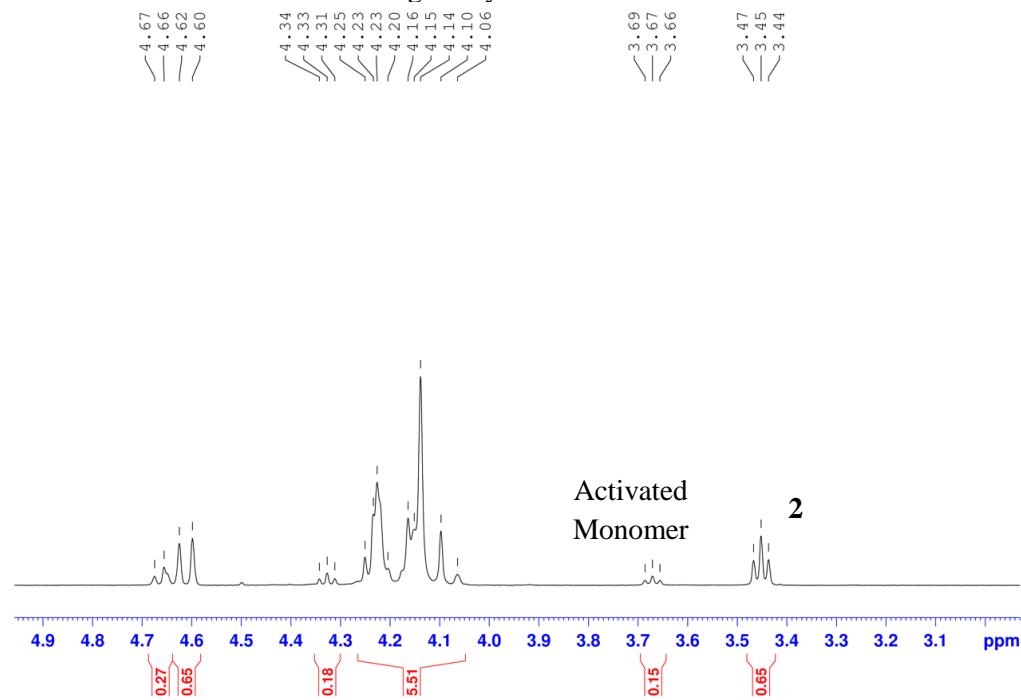

**Figure S22.** Expansion of the  $^1\text{H}$  NMR spectrum ( $\text{CD}_2\text{Cl}_2$ ) of monomer activation, showing distinct resonances for monomer **2** and the activated monomer **2**.

## B. Homopolymers

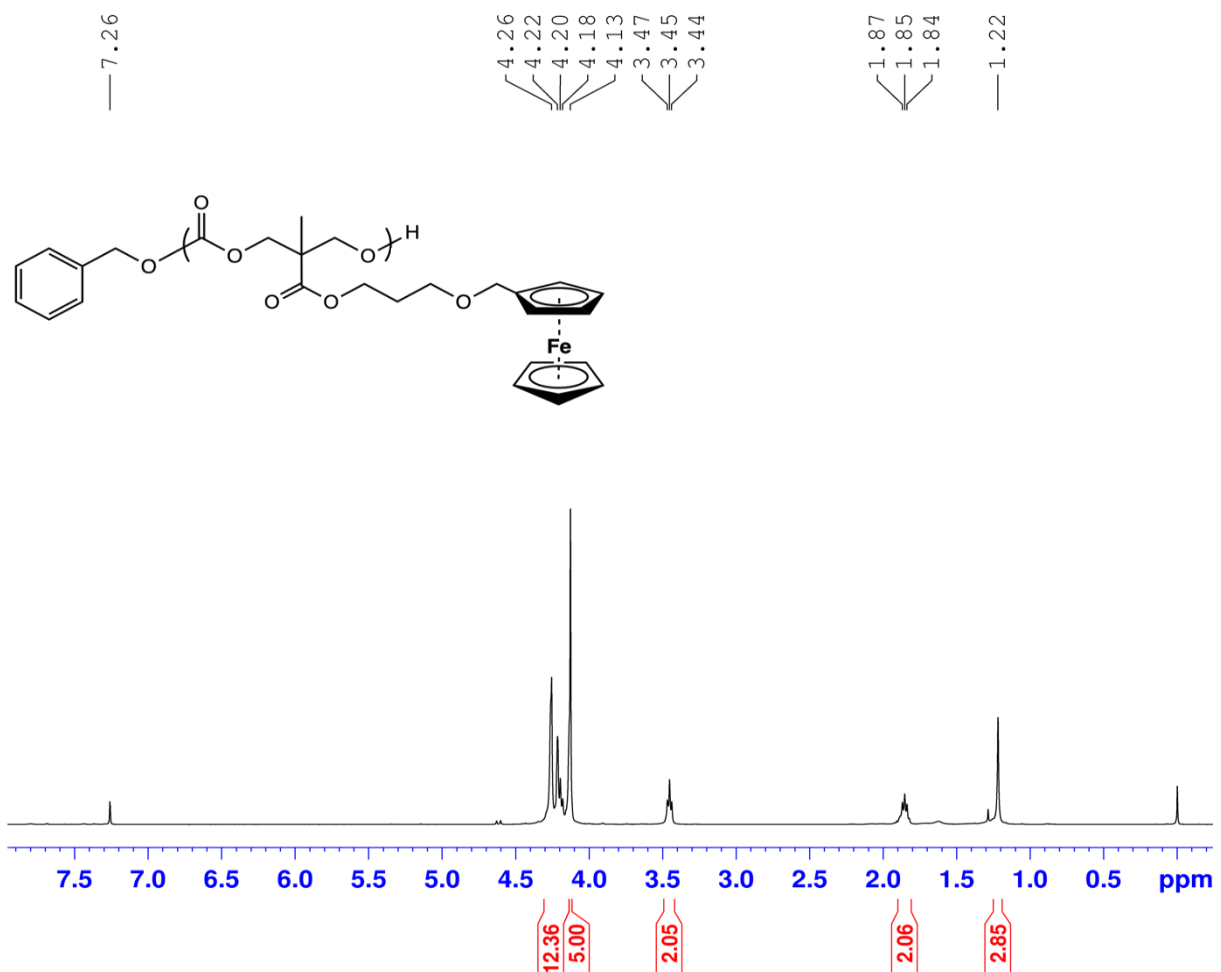

**Figure S23.** The <sup>1</sup>H NMR spectrum (CDCl<sub>3</sub>) of the polymerization of ferrocene monomer **2** (monomer:initiator = 300:1) with TU. Entry 1 in Table 1.

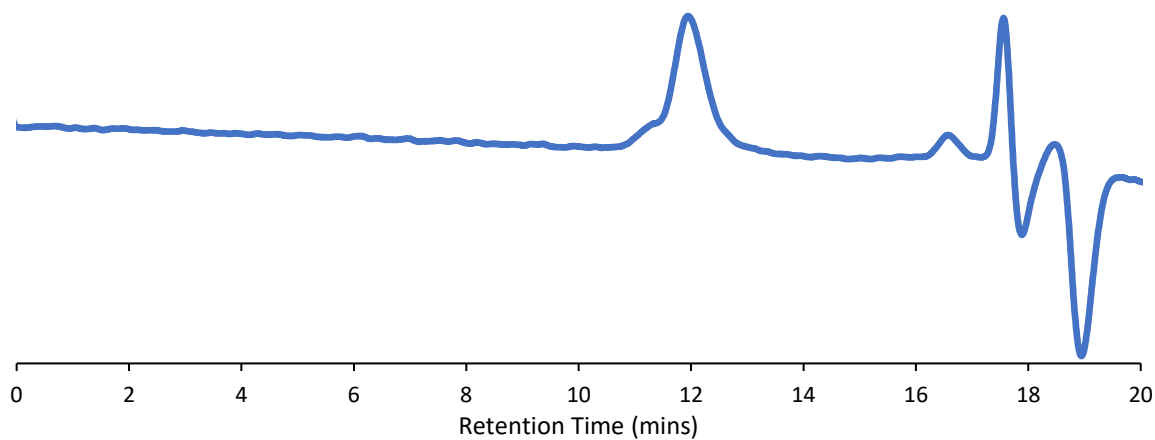

**Figure S24.** The GPC (THF) of the polymerization of ferrocene monomer **2** with TU. The  $M_n=85,850$  and the  $D=1.13$

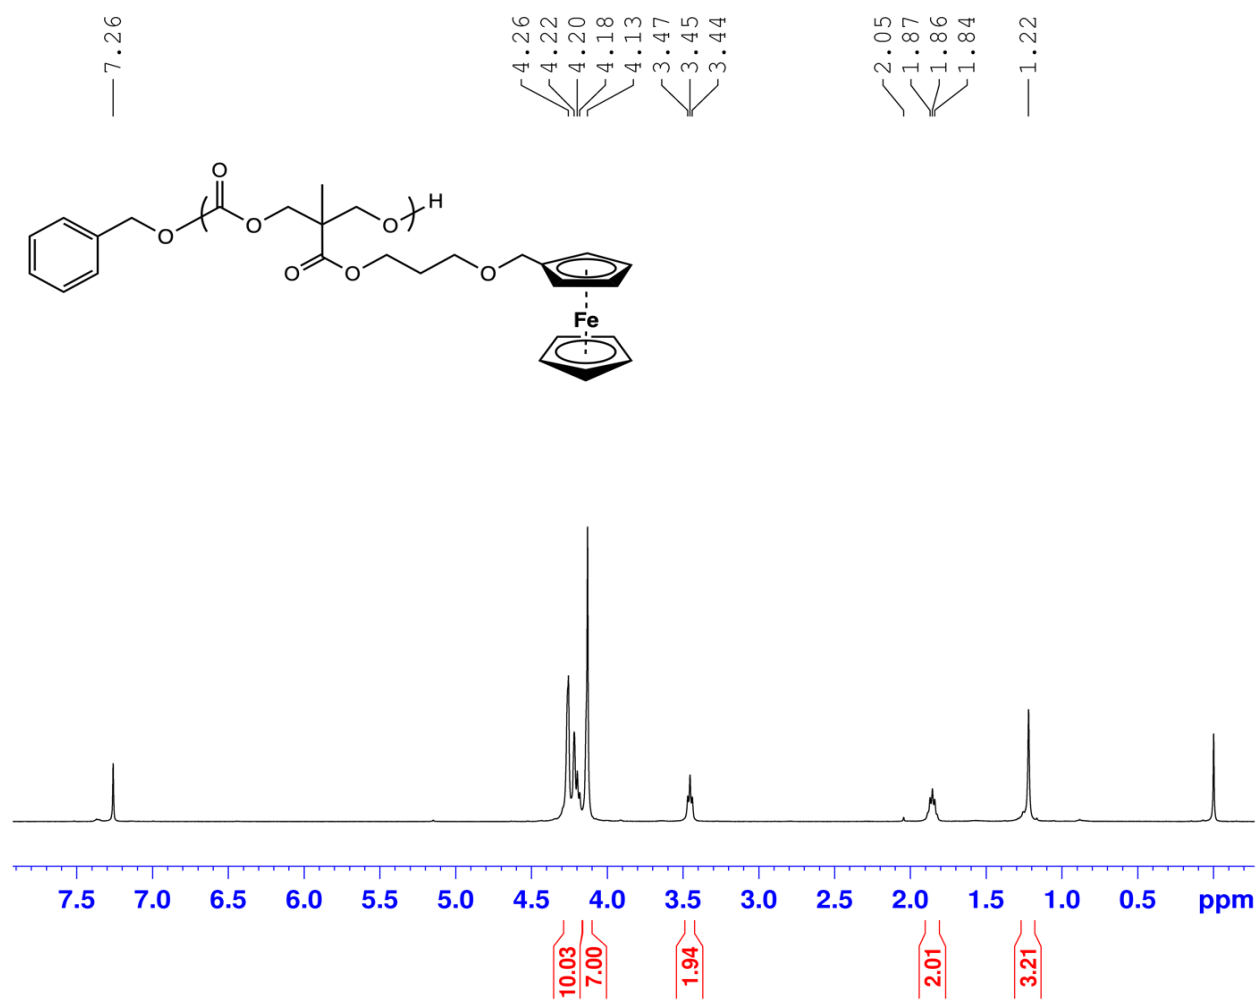

**Figure S25.** The  $^1\text{H}$  NMR spectrum (CDCl<sub>3</sub>) of the polymerization of ferrocene monomer **2** (monomer:initiator = 100:1). Entry 2 in Table 1.

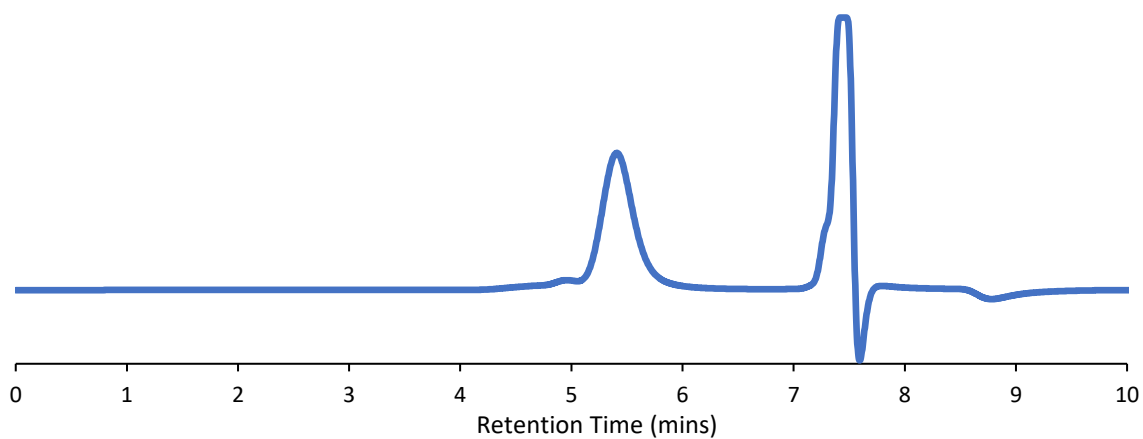

**Figure S26.** The GPC (THF) of the polymerization of ferrocene monomer **2**. The  $M_n = 35,249$  and the  $D = 1.18$ .

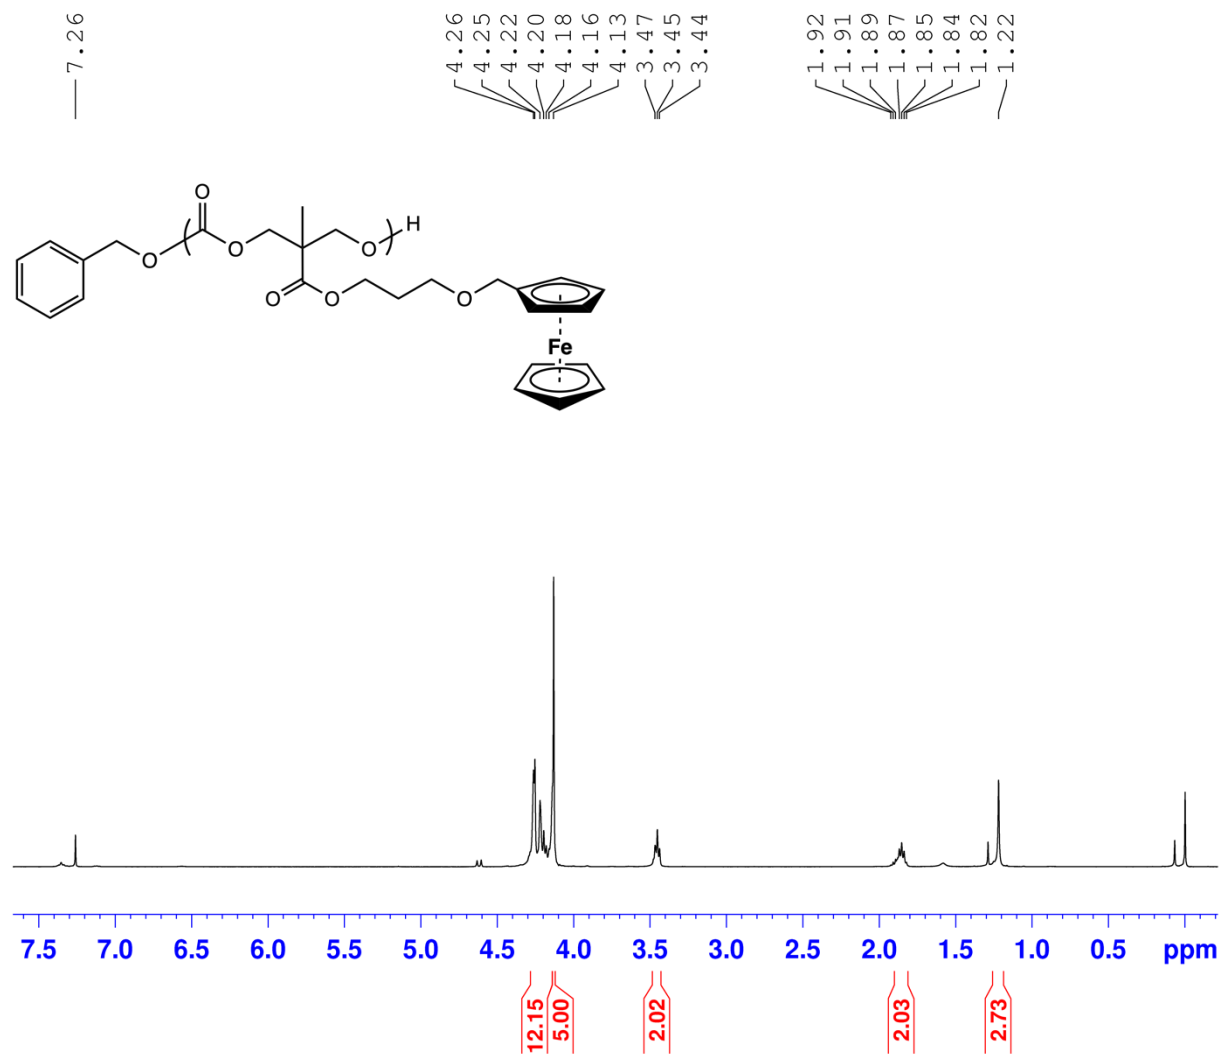

**Figure S27.** The <sup>1</sup>H NMR spectrum (CDCl<sub>3</sub>) of the polymerization of ferrocene monomer **2** (monomer:initiator = 300:1) with DPU. Entry 3 in Table 1.

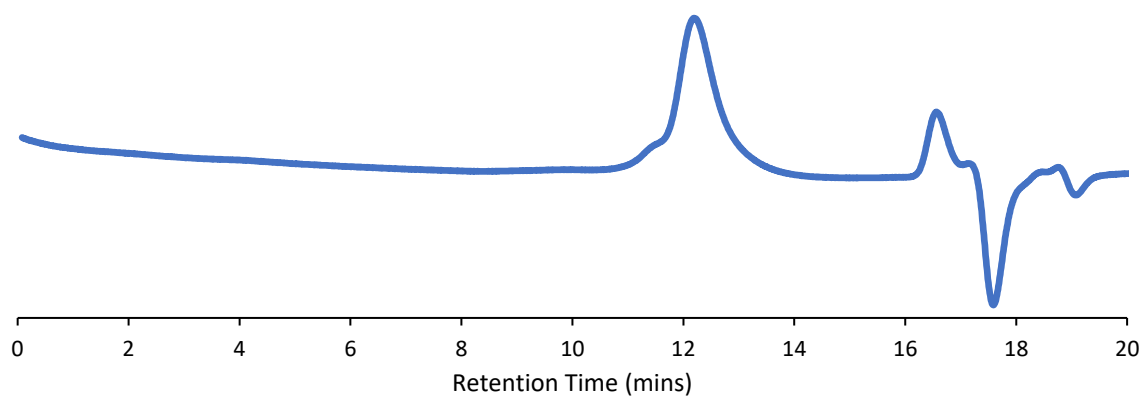

**Figure S28.** The GPC (THF) of the polymerization of ferrocene monomer **2** with DPU. The  $M_n = 81,560$  and the  $D = 1.22$

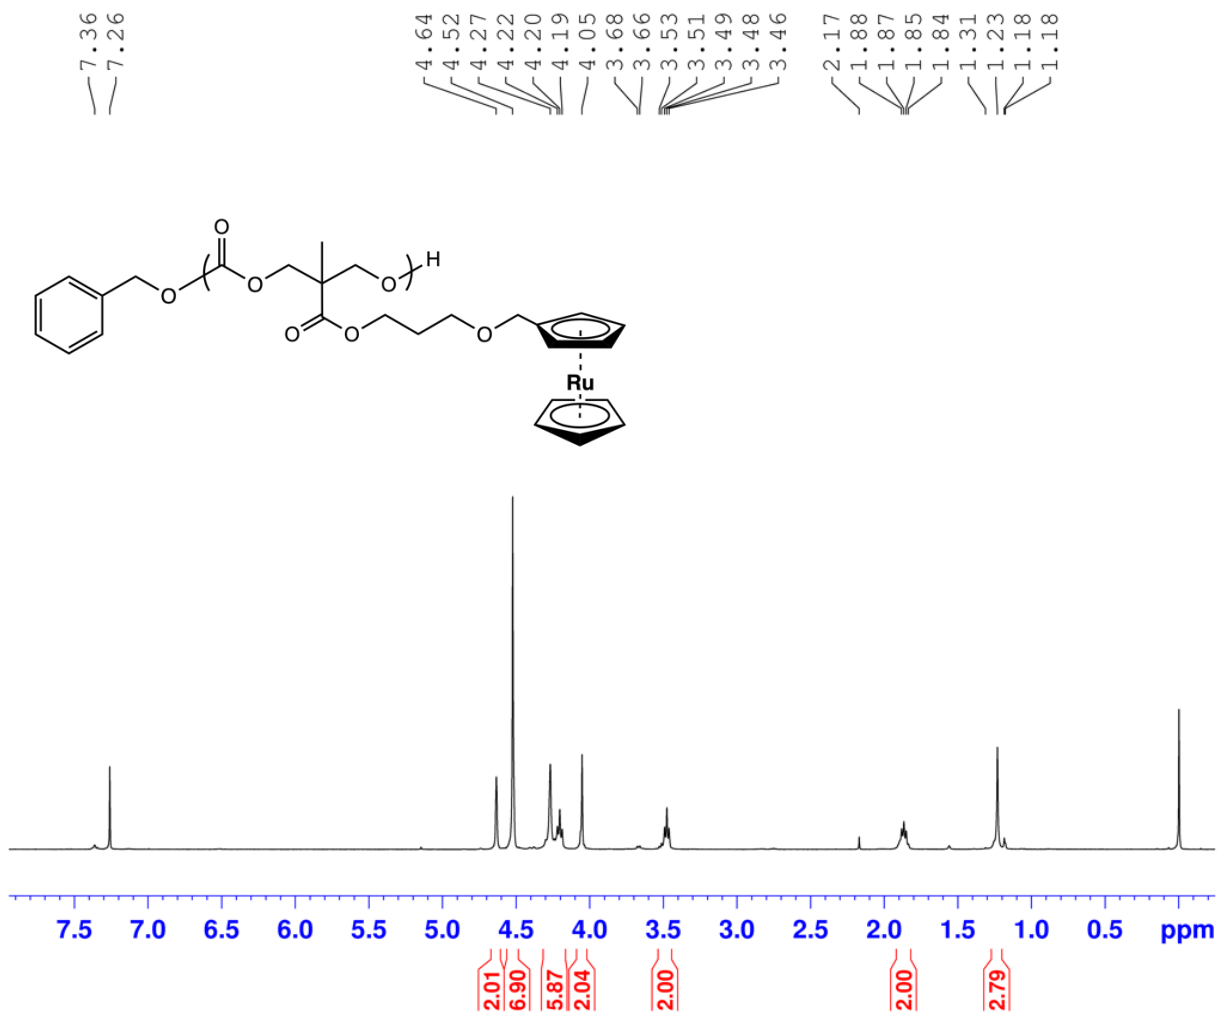

**Figure S29.** The  $^1\text{H}$  NMR spectrum ( $\text{CDCl}_3$ ) of the polymerization of the ruthenocene monomer **4** (monomer:initiator = 90:1). Entry 4 in Table 1.

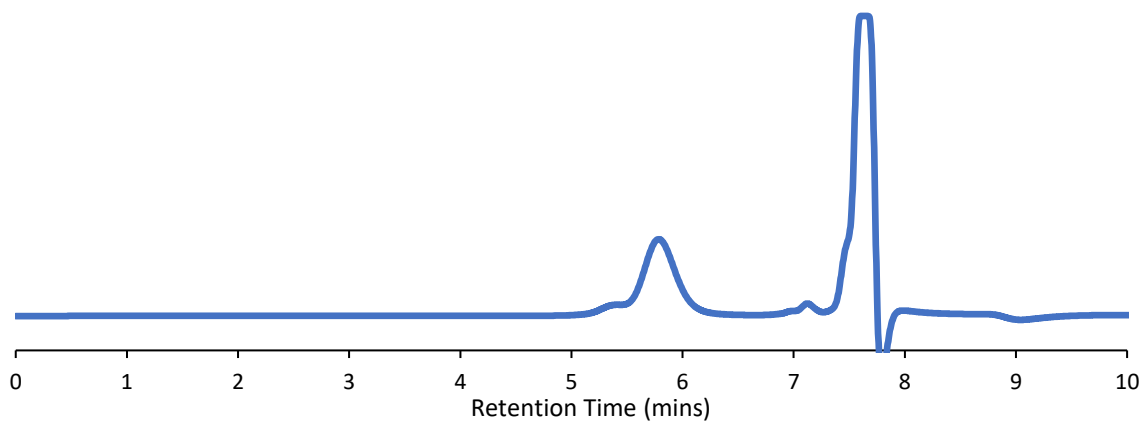

**Figure S30.** The GPC (THF) of the polymerization of the ruthenocene monomer **4**. The  $M_n=37,980$  and the  $D=1.25$



### C. Diblocks

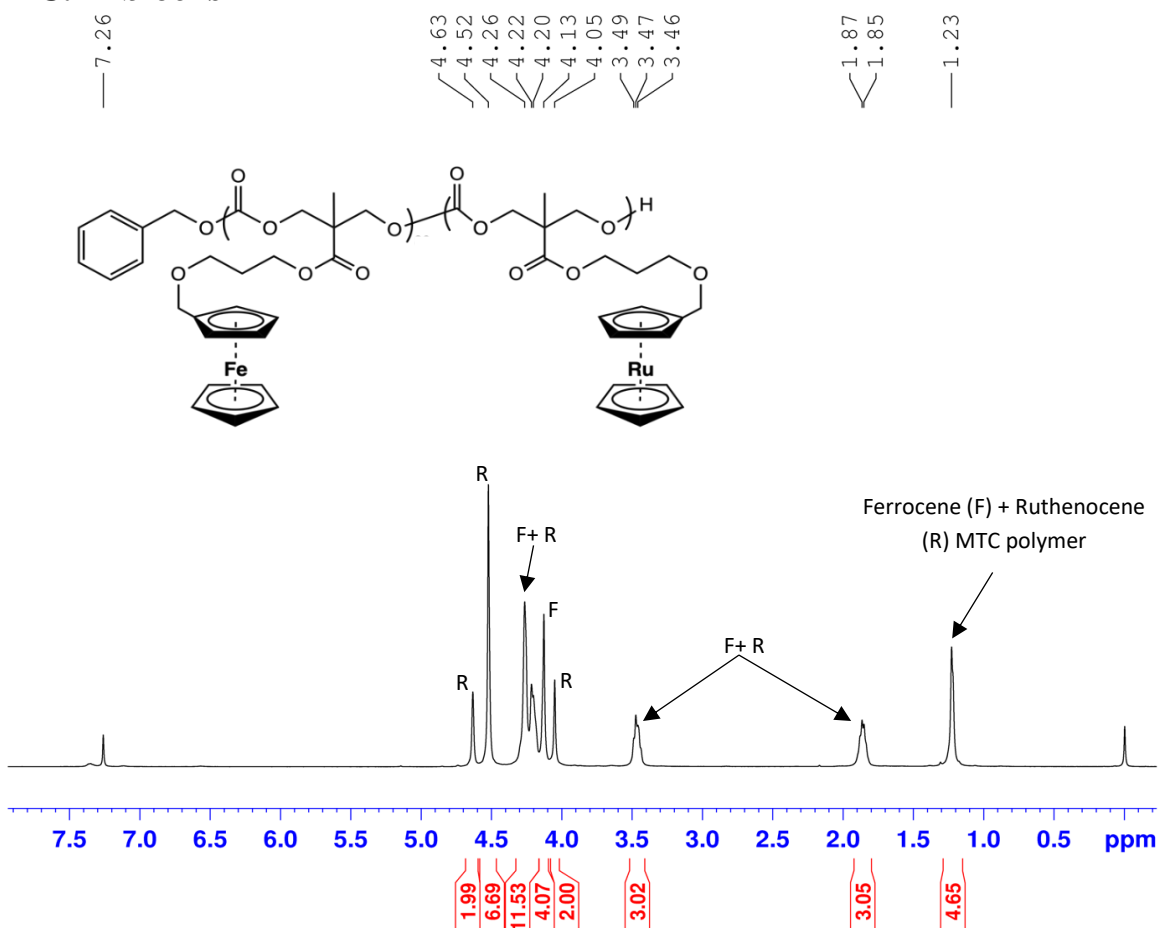

**Figure S31.** The <sup>1</sup>H NMR spectra (CDCl<sub>3</sub>) of the copolymerization of the ferrocene **2** and ruthenocene **4** monomer (**2**:**4**:initiator = 100:100:1). Entry 5 in Table 2.

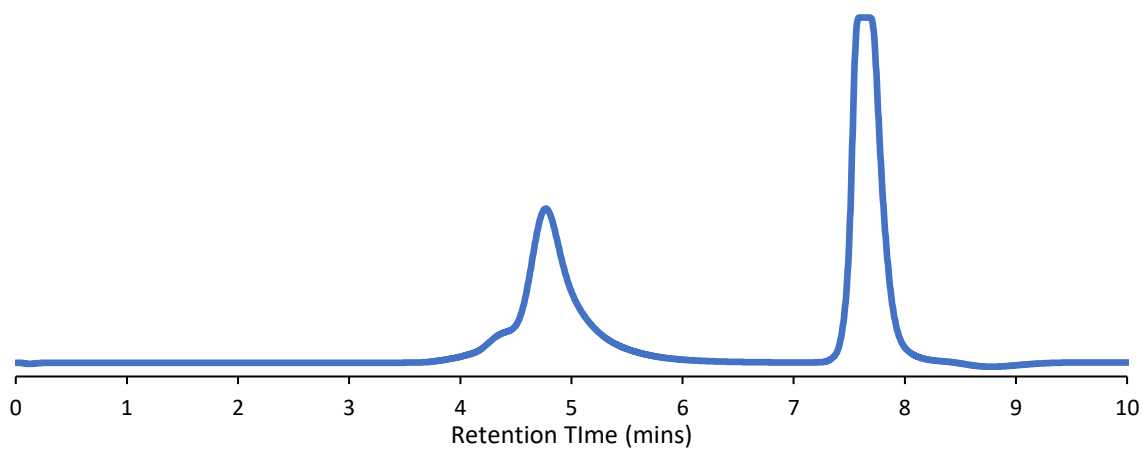

**Figure S32.** The GPC (THF) of the copolymerization of the ferrocene **2** and ruthenocene **4** monomer.  $M_n = 96,401$  and the  $D=1.16$ .

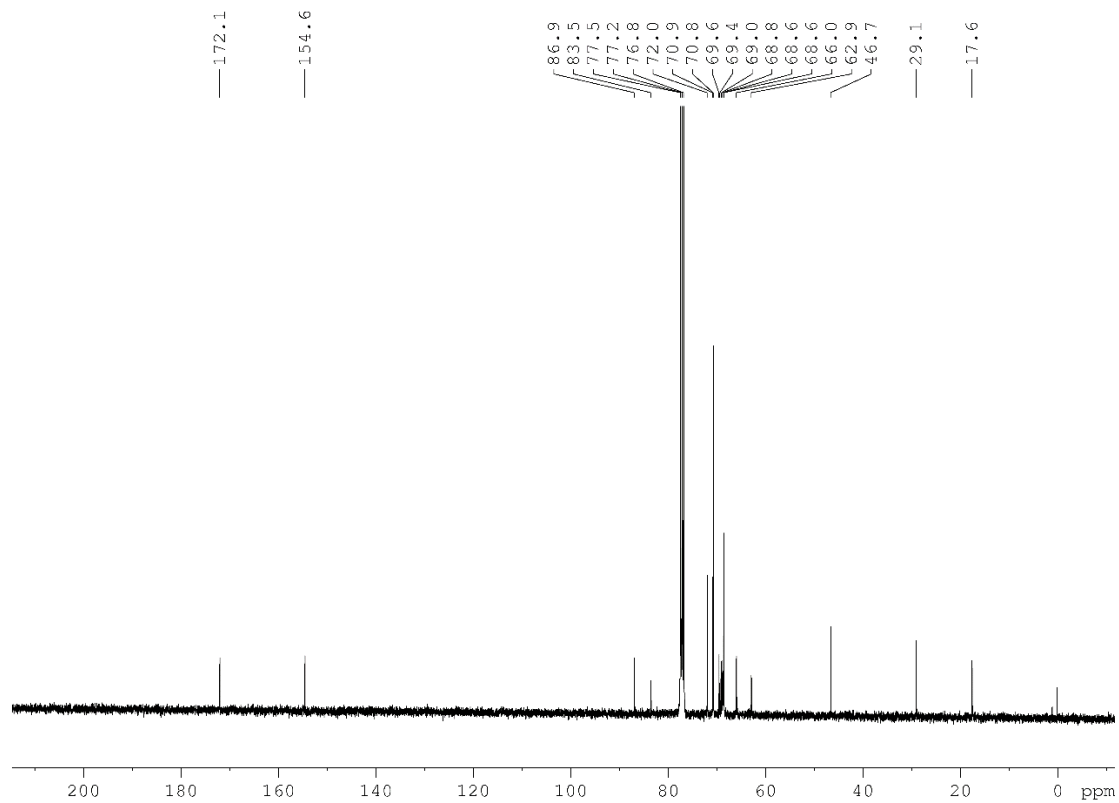

**Figure S33.** The  $^{13}\text{C}$  NMR spectra ( $\text{CDCl}_3$ ) of the copolymerization of the ferrocene **2** and ruthenocene **4** monomer (**2:4:initiator** = 100:100:1). Entry 5 in Table 2.

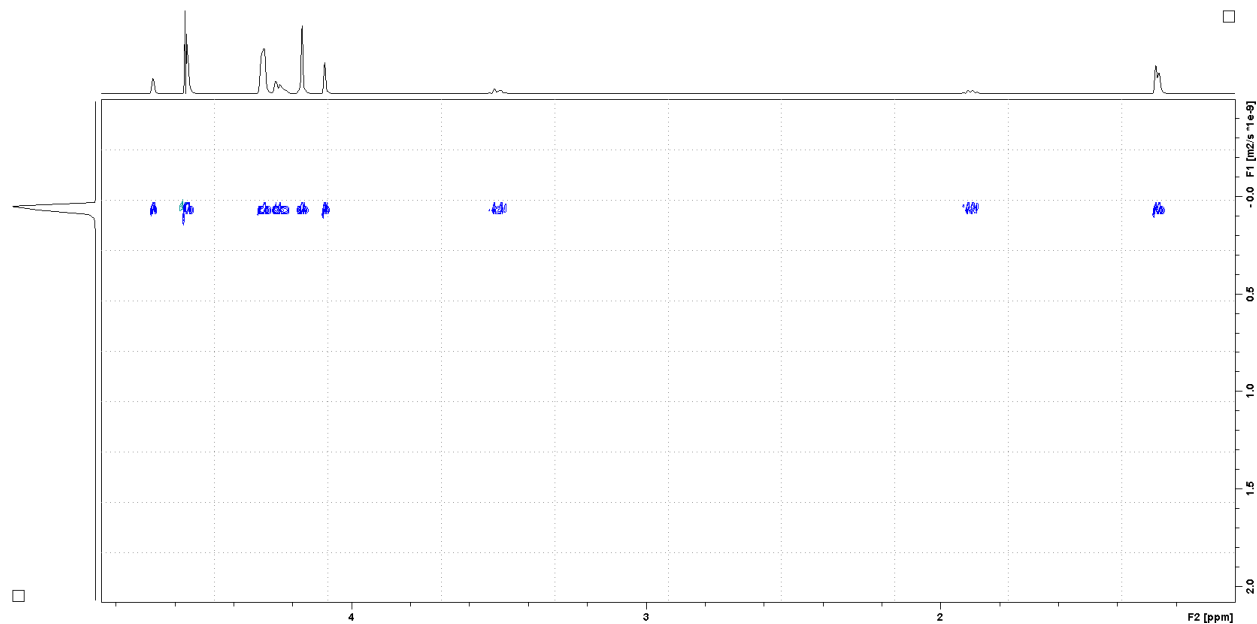

**Figure S34.** The DOSY NMR spectra ( $\text{CDCl}_3$ ) of the copolymerization of the ferrocene **2** and ruthenocene **4** monomer (**2:4:initiator** = 100:100:1). Entry 5 in Table 2.

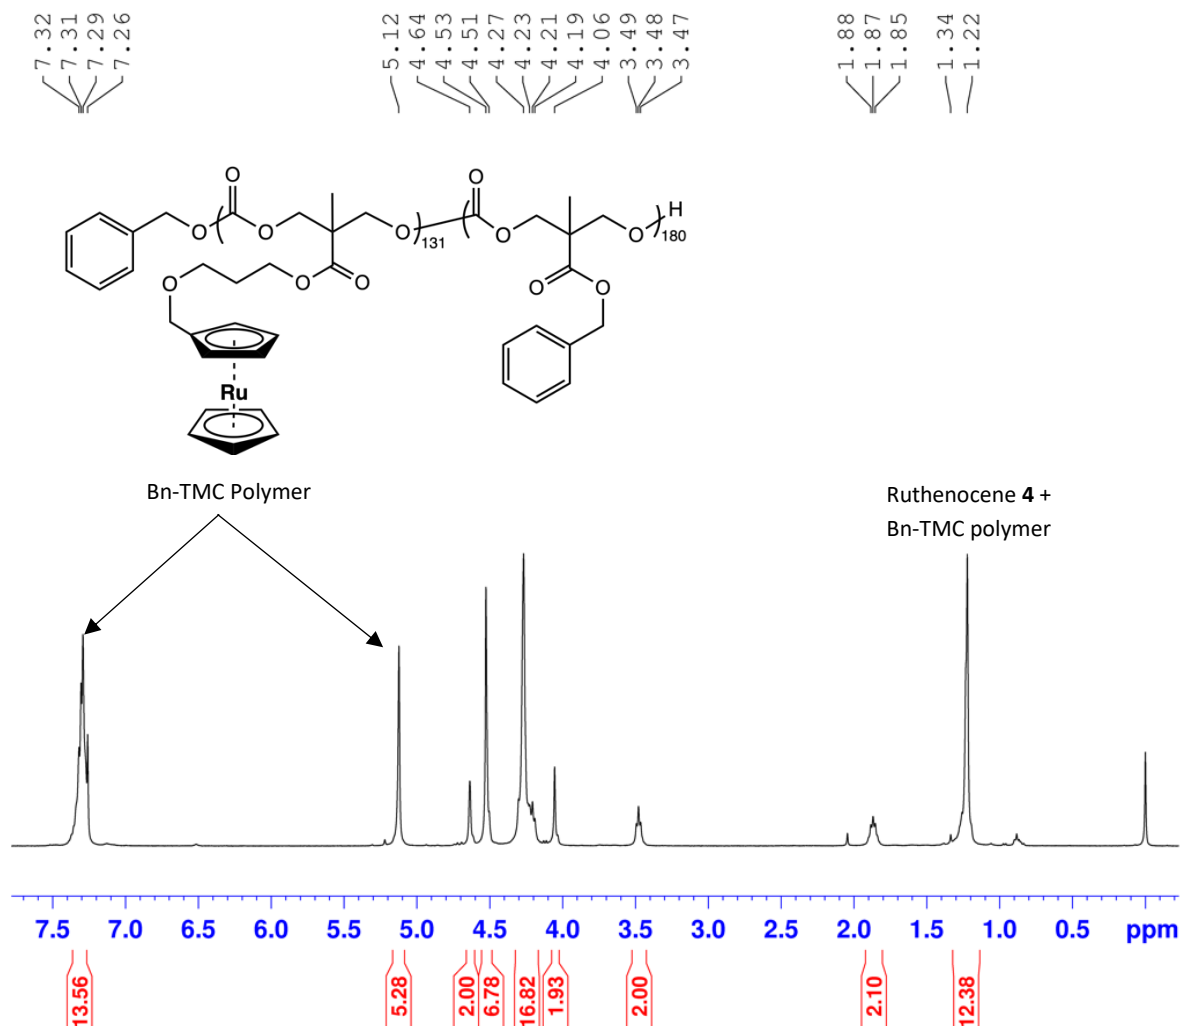

**Figure S35.** The  $^1\text{H}$  NMR spectra ( $\text{CDCl}_3$ ) of the copolymerization of ruthenocene **4** and **Bn-TMC** monomer (**4**:**Bn-TMC**:initiator = 145:200:1). Entry 6 in Table 2.

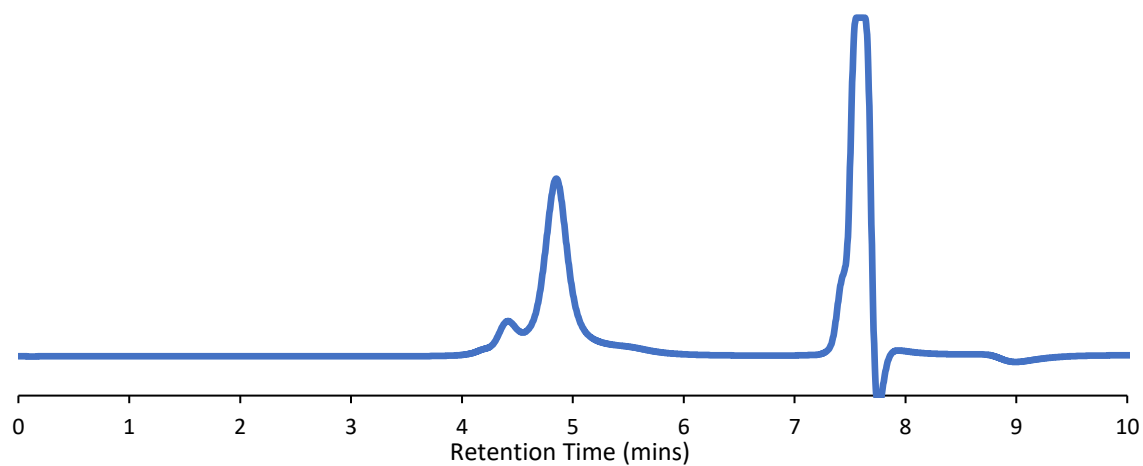

**Figure S36.** The GPC spectra (THF) of the copolymerization of ruthenocene **4** and **Bn-TMC** monomer.  $M_n=92,707$  and the  $D=1.13$ .

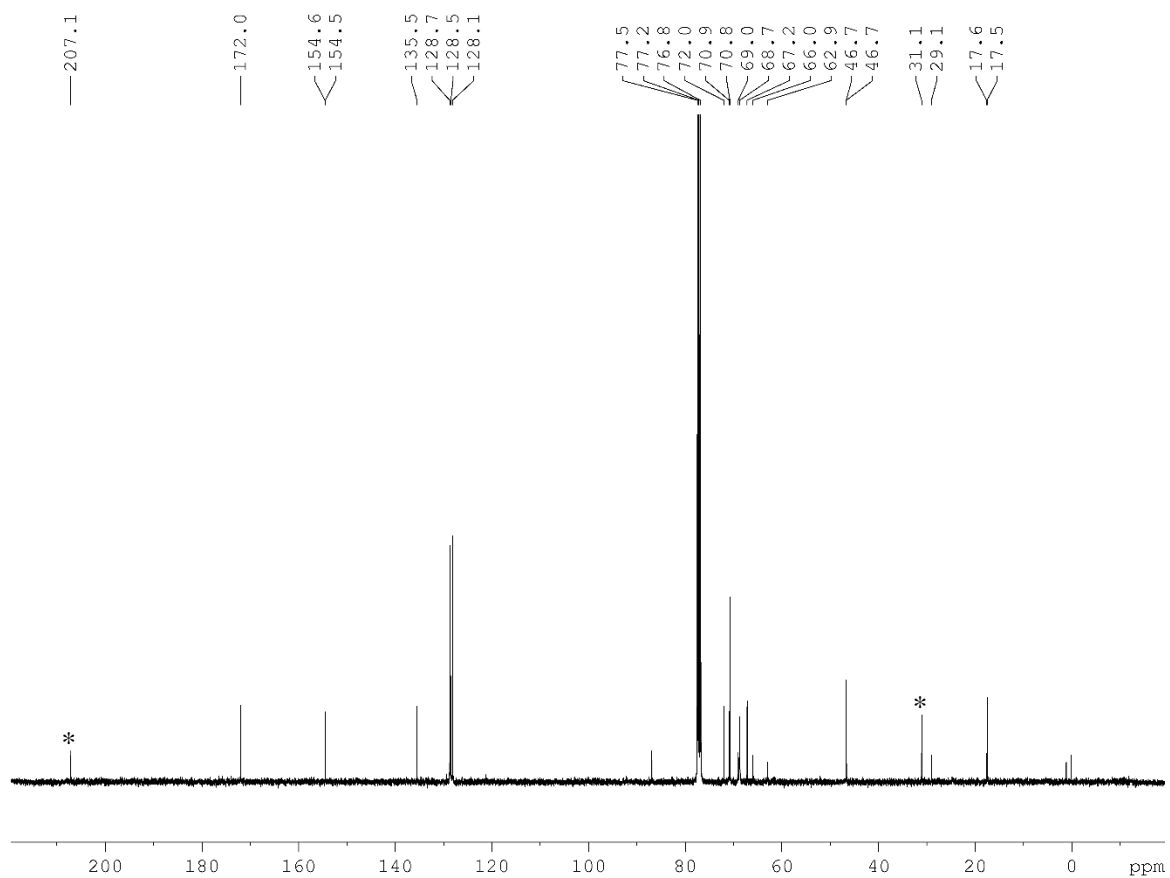

**Figure S37.** The  $^{13}\text{C}$  NMR spectra ( $\text{CDCl}_3$ ) of the copolymer of ruthenocene **4** and **Bn-TMC** monomer (**4**: **Bn-TMC**:initiator = 145:200:1). Entry 6 in Table 2. Some acetone (\*) is present (207.1, 31.1 ppm).

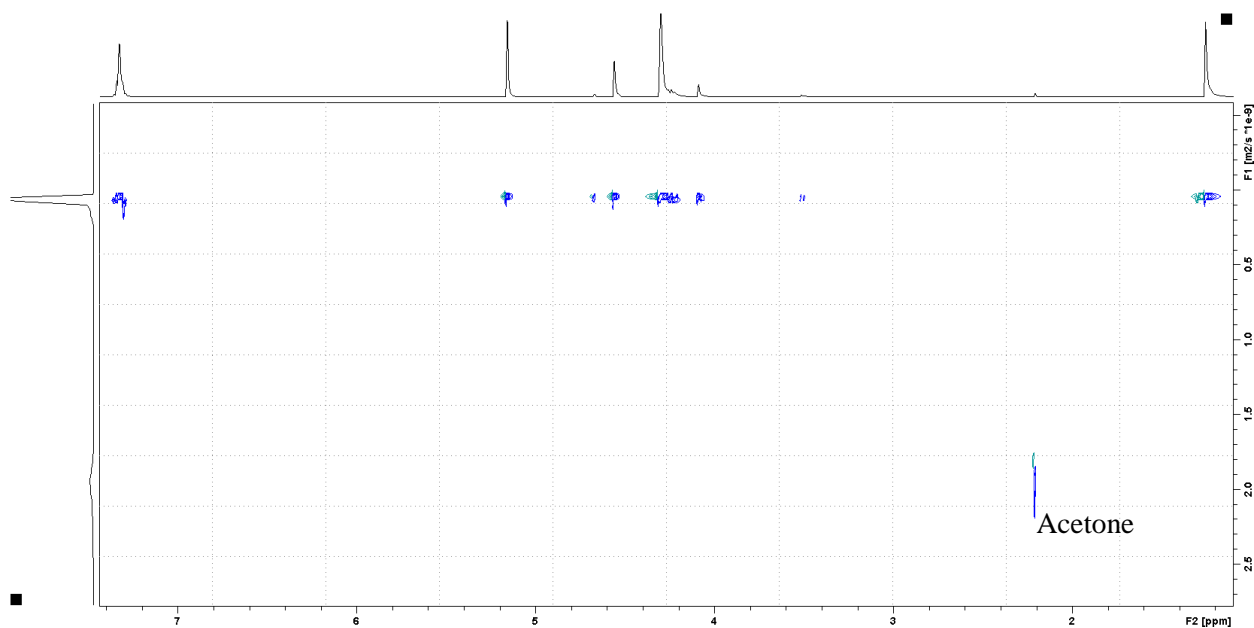

**Figure S38.** The DOSY NMR spectra ( $\text{CDCl}_3$ ) of the copolymer of ruthenocene **4** and **Bn-TMC** monomer (**4**: **Bn-TMC**:initiator = 145:200:1). Entry 6 in Table 2. Some acetone is present (2.1 ppm).

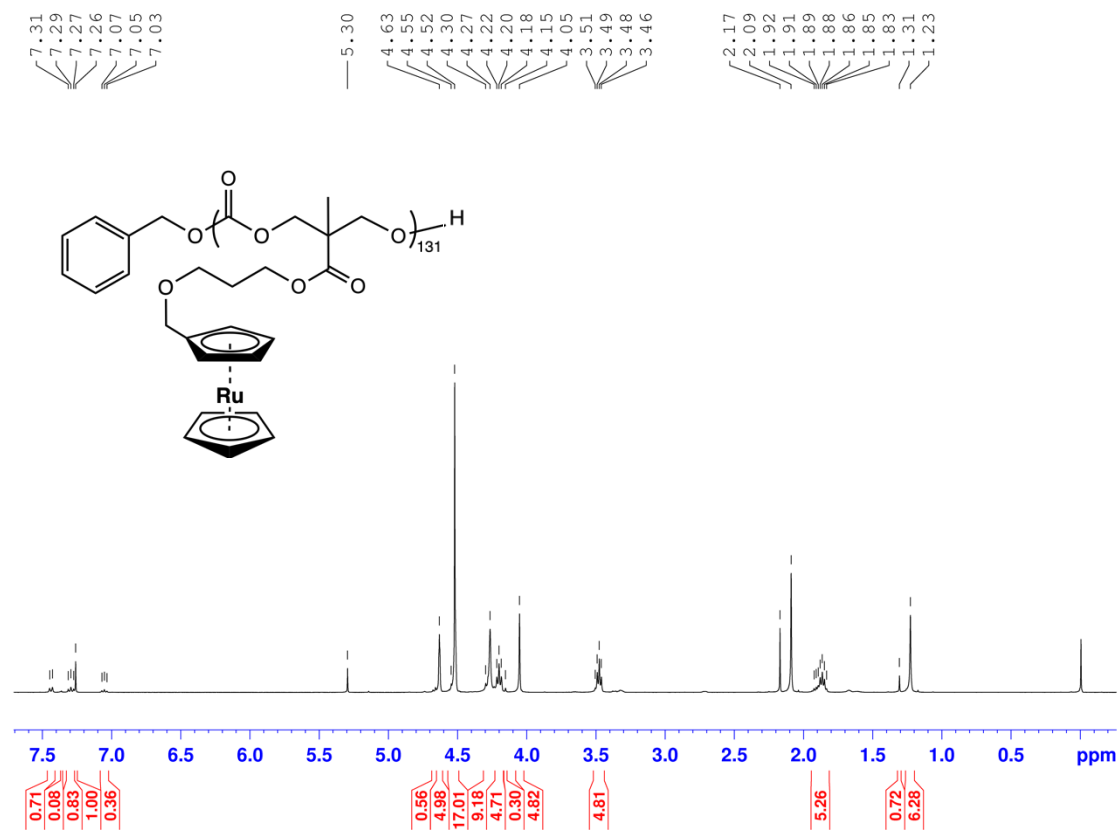

**Figure S39.** The <sup>1</sup>H NMR spectra (CDCl<sub>3</sub>) of an aliquot of the **4** block, for the copolymerization of ruthenocene monomer **4** and **Bn-TMC** (**4**:initiator = 145:1). % Conversion = 90%. Entry 6 in Table 2.

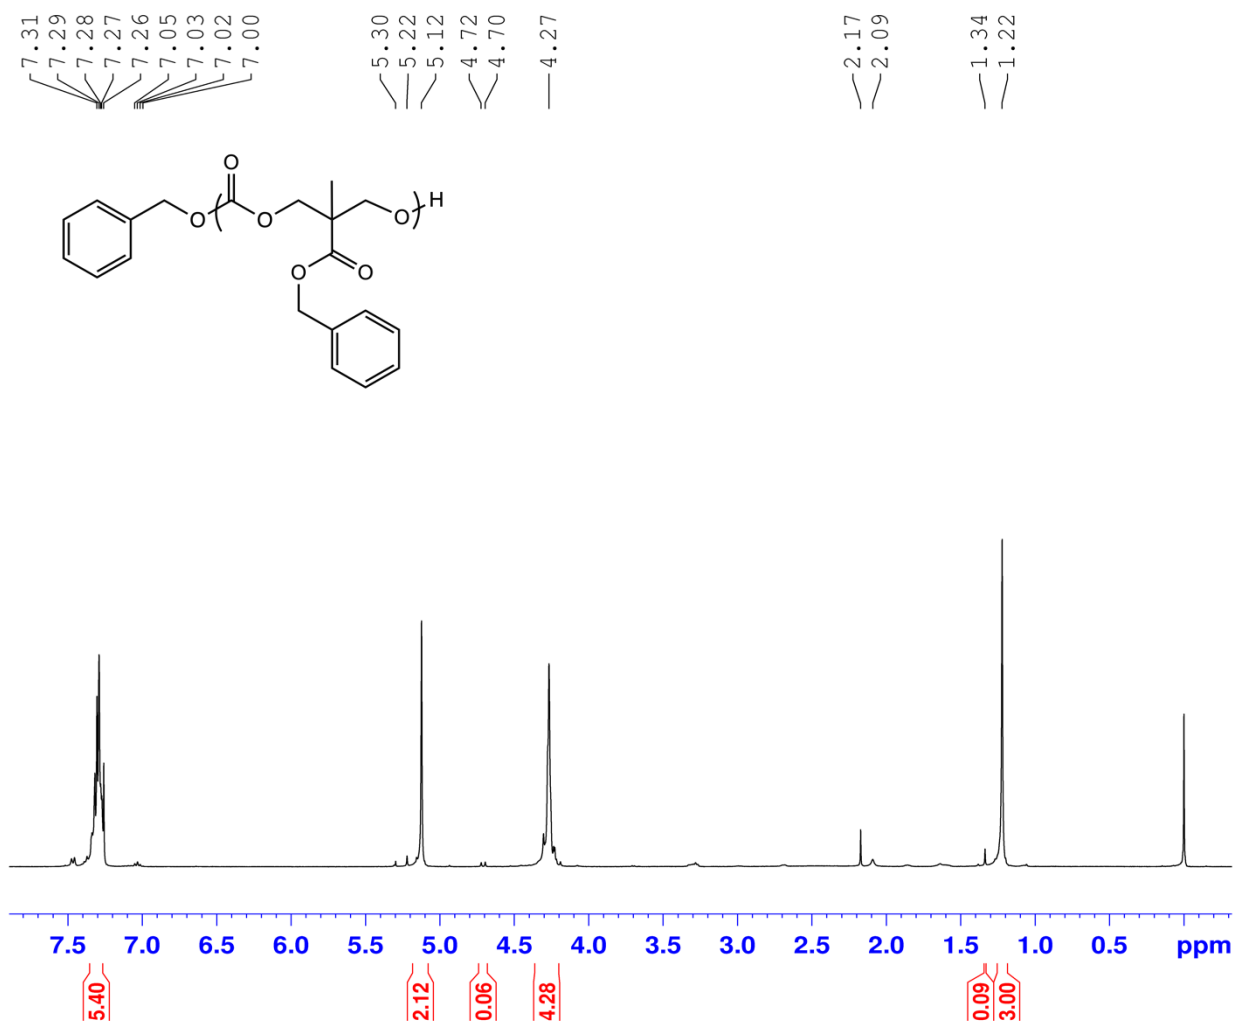

**Figure S40.** The <sup>1</sup>H NMR spectra (CDCl<sub>3</sub>) of an aliquot of the **Bn-TMC** block, for the copolymerization of **Bn-TMC** and ruthenocene monomer **4** (**Bn-TMC**:initiator = 200:1). % Conversion = 97%. Entry 7 in Table 2.

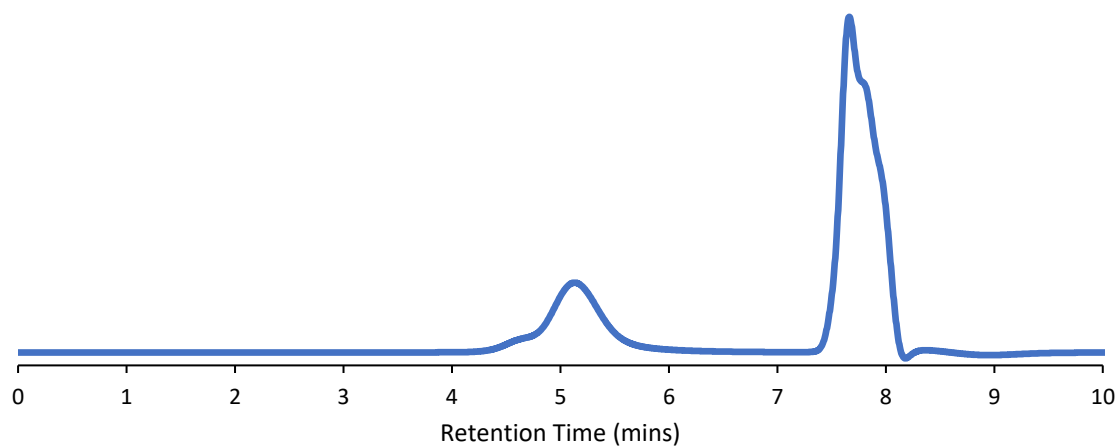

**Figure S41.** The GPC (THF) of the aliquot of the **Bn-TMC** block.  $M_n = 48,073$  and the  $\mathcal{D} = 1.19$ . Entry 7 in Table 2.

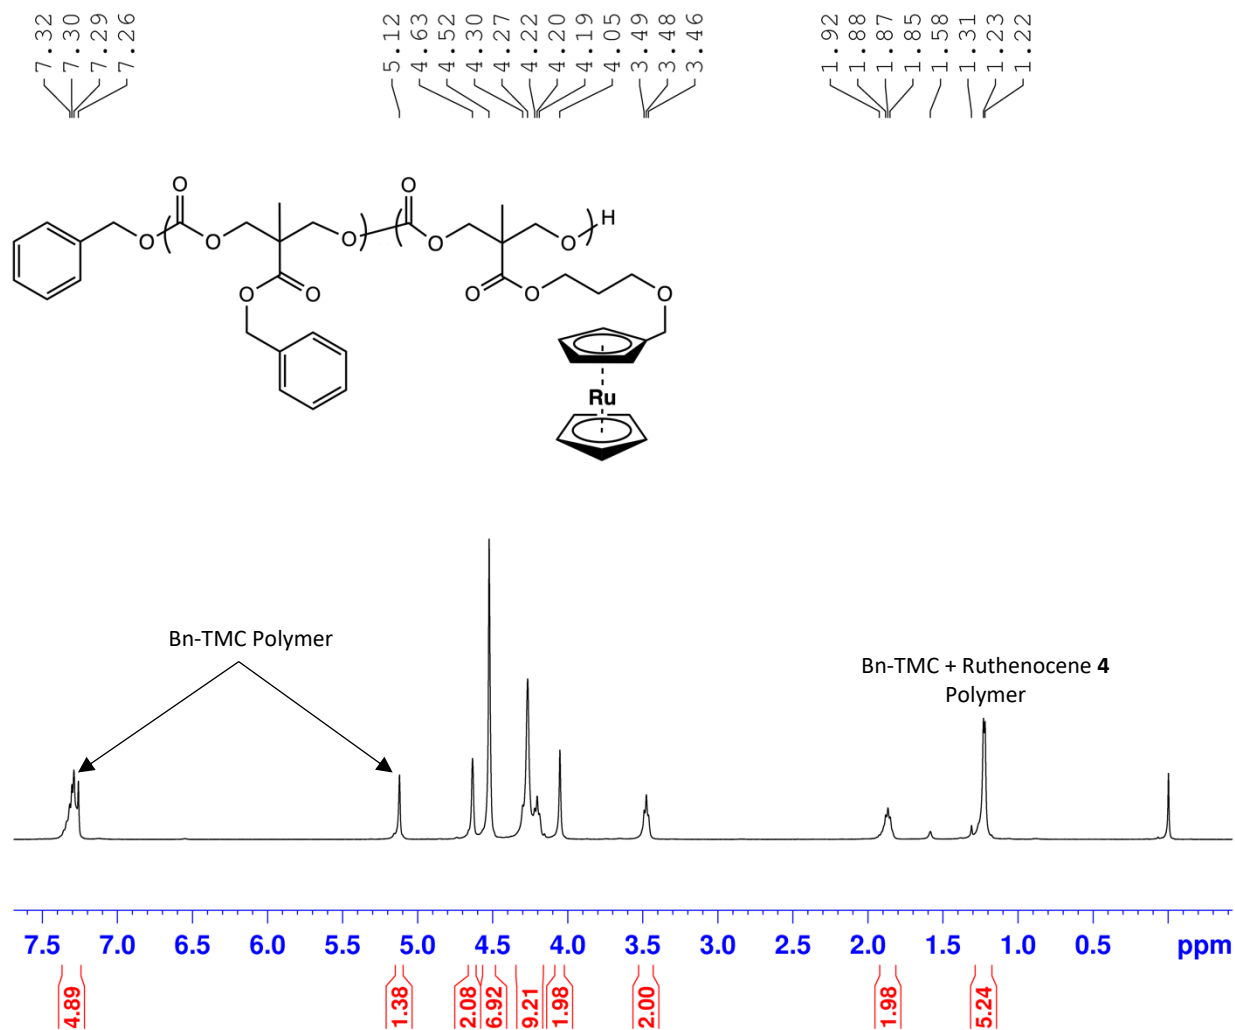

**Figure S42.** The  $^1\text{H}$  NMR spectra ( $\text{CDCl}_3$ ) of the copolymerization of **Bn-TMC** and ruthenocene monomer **4** (**Bn-TMC**:**4**:initiator = 200:145:1). Entry 7 in Table 2.

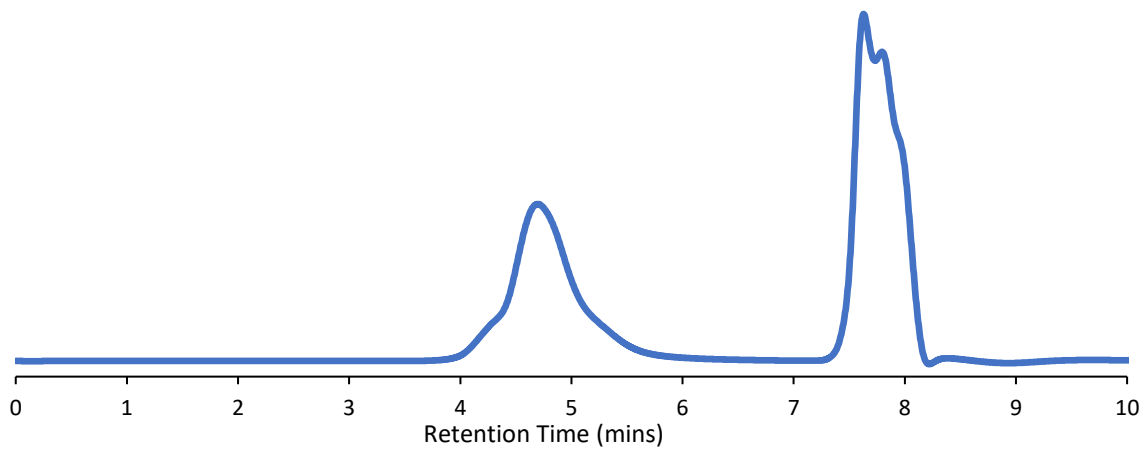

**Figure S43.** The GPC (THF) of the copolymerization of **Bn-TMC** and ruthenocene monomer **4**.  $M_n = 115,357$  and the  $D = 1.11$ .

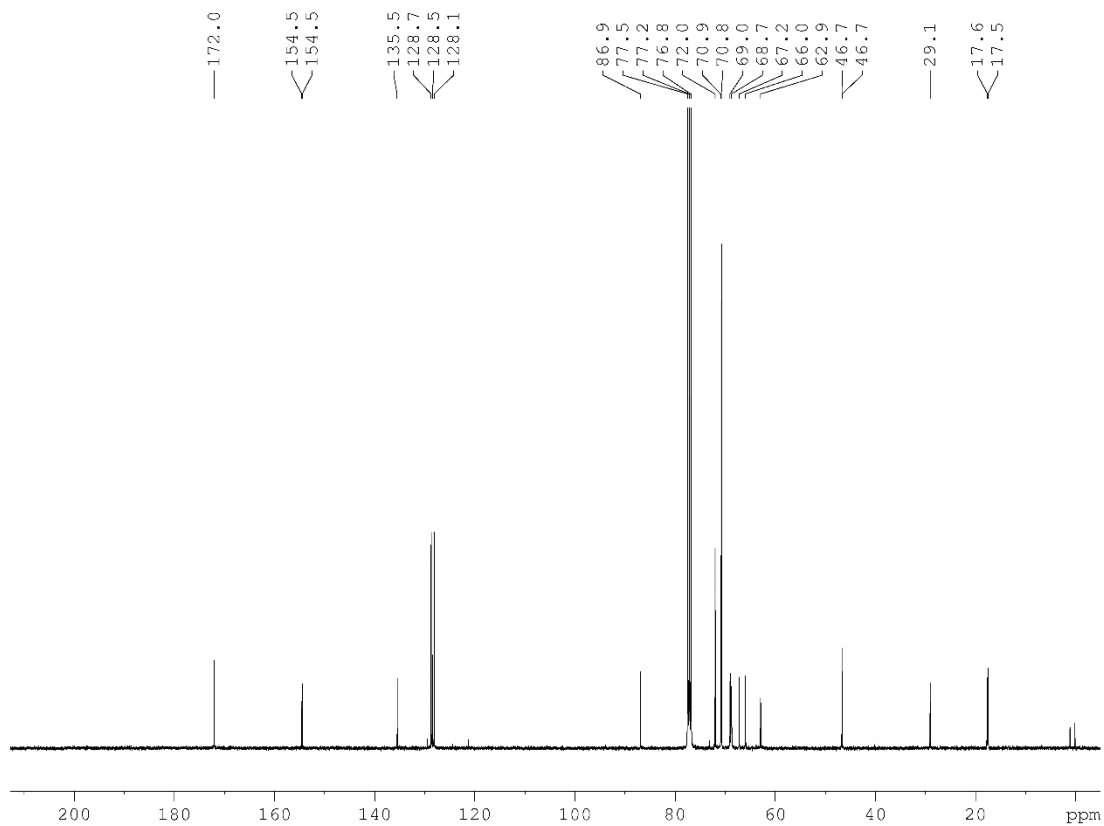

**Figure S44.** The  $^{13}\text{C}$  NMR spectra ( $\text{CDCl}_3$ ) of the copolymerization of **Bn-TMC** and ruthenocene monomer **4** (**Bn-TMC**:**4**:initiator = 200:145:1). Entry 7 in Table 2.

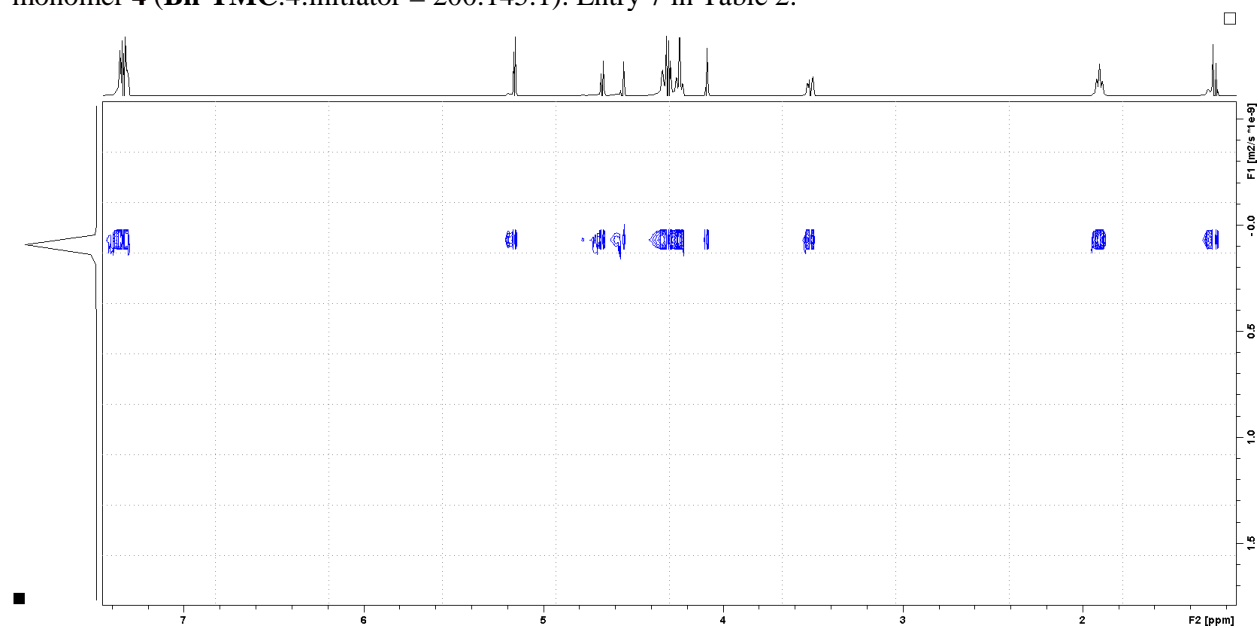

**Figure S45.** The DOSY NMR spectra ( $\text{CDCl}_3$ ) of the copolymerization of **Bn-TMC** and ruthenocene monomer **4** (**Bn-TMC**:**4**:initiator = 200:145:1). Entry 7 in Table 2.



## V. Mechanistic Studies

### A. Chain Extension

**Figure S46.** The  $^1\text{H}$  NMR spectra ( $\text{CDCl}_3$ ) of the chain extension experiment with the ferrocene monomer **2**. a) The initial reaction with a monomer:initiator ratio of 150:1. b) Addition of monomer **2** to reach a total monomer:initiator ratio of 300:1 after stirring 30 additional minutes.

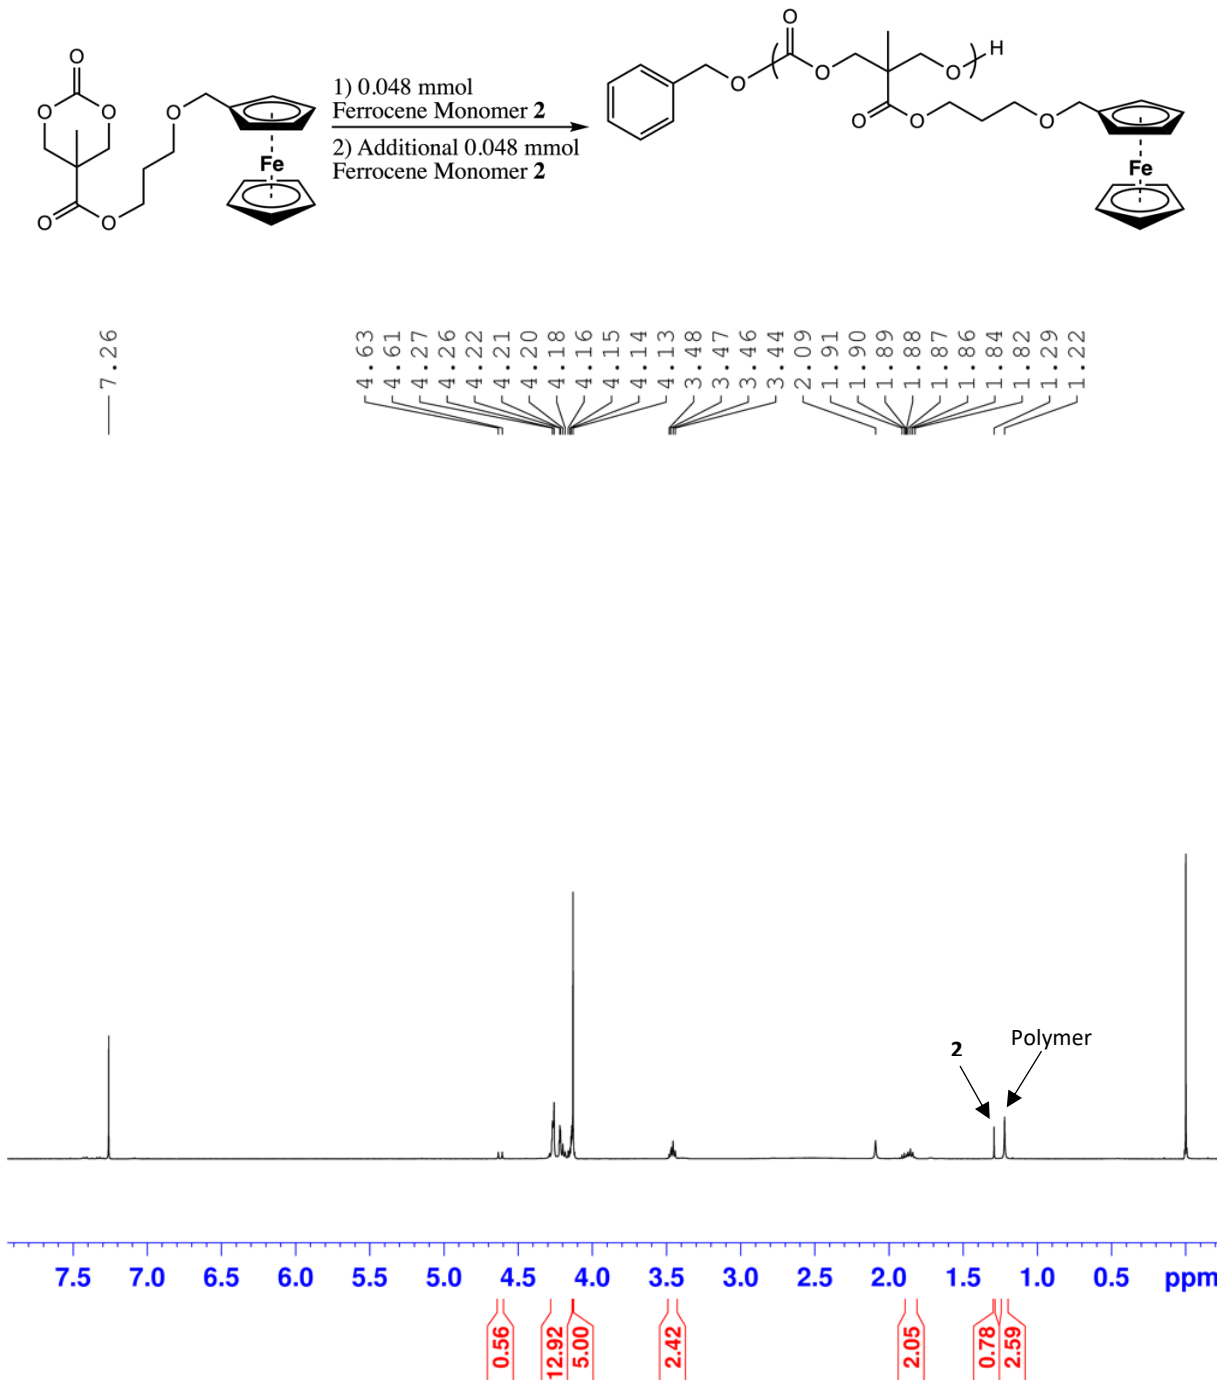

a) Initial polymerization. % Conversion = 76%.

—7.26

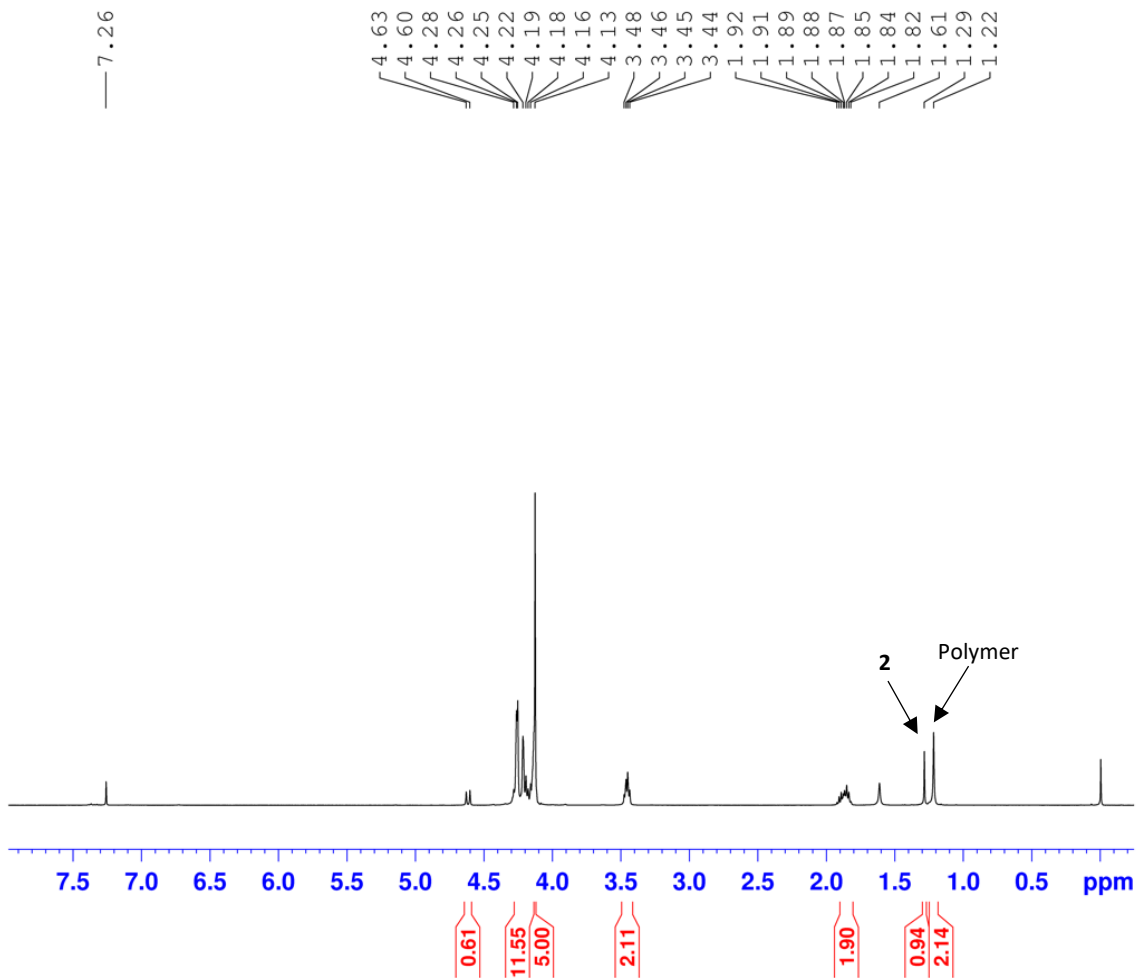

b) Additional monomer. Total % Conversion = 67%.

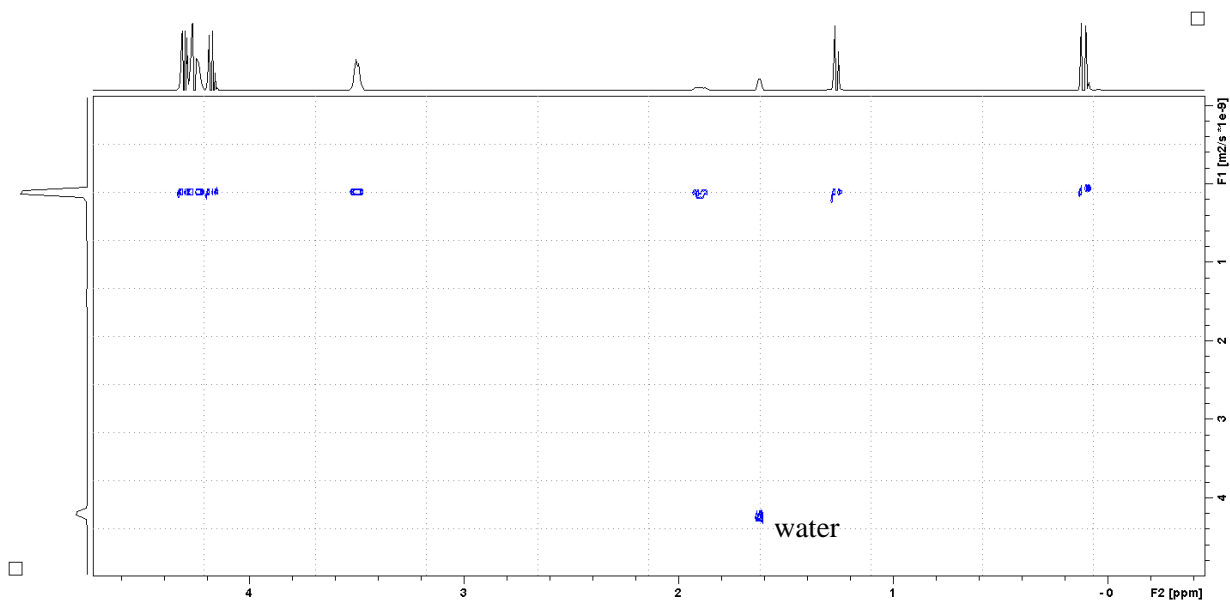

**Figure S47.** The DOSY NMR spectra (CDCl<sub>3</sub>) of the completed chain extension experiment. Some water is present in the sample at 1.6 ppm.

**Figure S48.** The GPC (THF) of the chain extension experiment with the ferrocene monomer **2**. a) The initial reaction with a monomer:initiator ratio of 150:1. b) Addition of monomer **2** to reach a total monomer:initiator ratio of 300:1 after stirring 30 additional minutes.

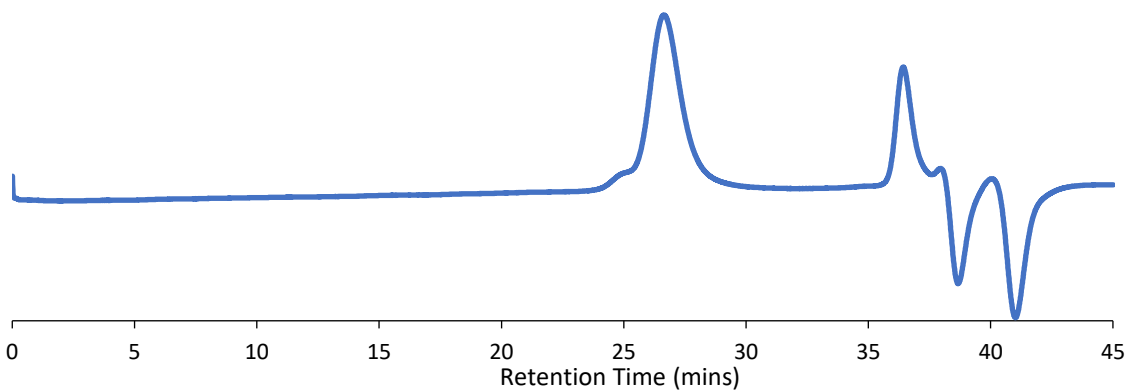

a) Initial polymerization reaction. GPC-LS  $M_n = 50,983$  and the  $D = 1.07$ .

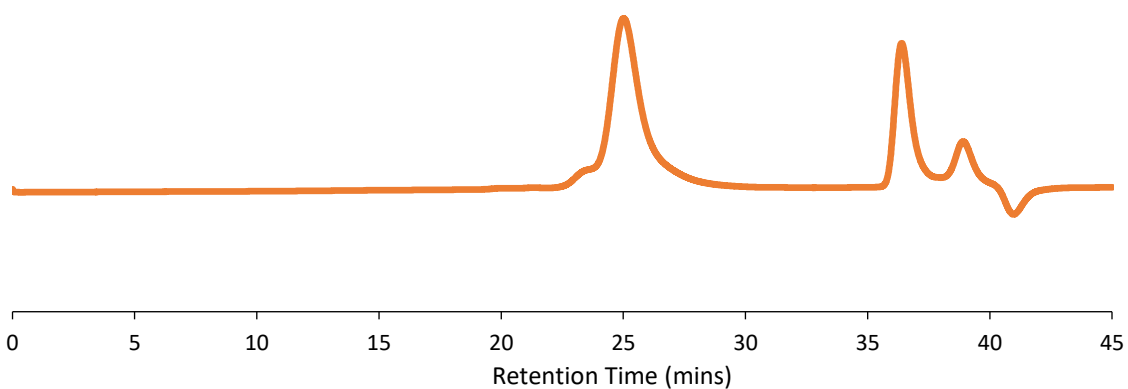

b) Additional monomer. GPC-LS  $M_n = 106,972$  and the  $D = 1.08$ .

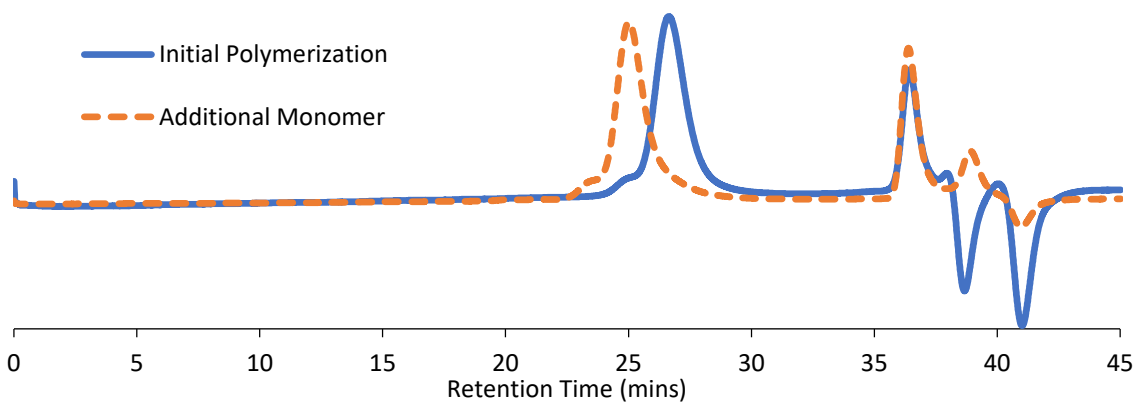

c) Overlay of the initial polymerization and after chain extension with additional monomer **2**.

## B. Conversion and Molecular Weight Versus Time

**Figure S49.** The  $^1\text{H}$  NMR spectra ( $\text{CDCl}_3$ ) and GPC (THF) of aliquots of a homopolymerization of ferrocene monomer **2** (monomer:initiator ratio of 300:1). The  $M_n$ 's are calculated by GPC-RI using polystyrene standards, which gives lower-than-expected measurements for molecular weight. The presence of unreacted **2** in the aliquots complicated  $M_n$  calculation with GPC-LS.

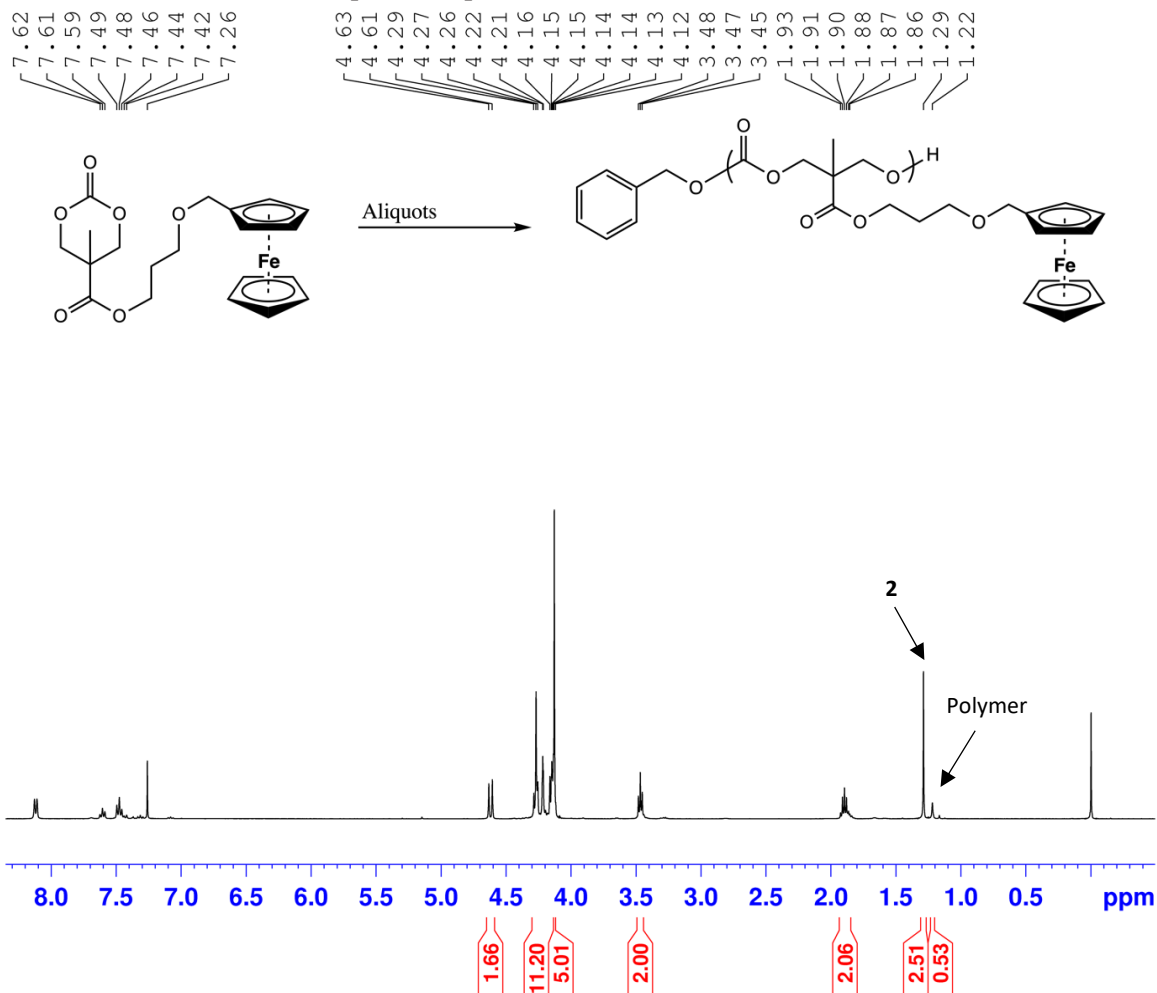

a)  $^1\text{H}$  NMR spectrum ( $\text{CDCl}_3$ ) of aliquot after 2 mins. % Conversion=17.5%.

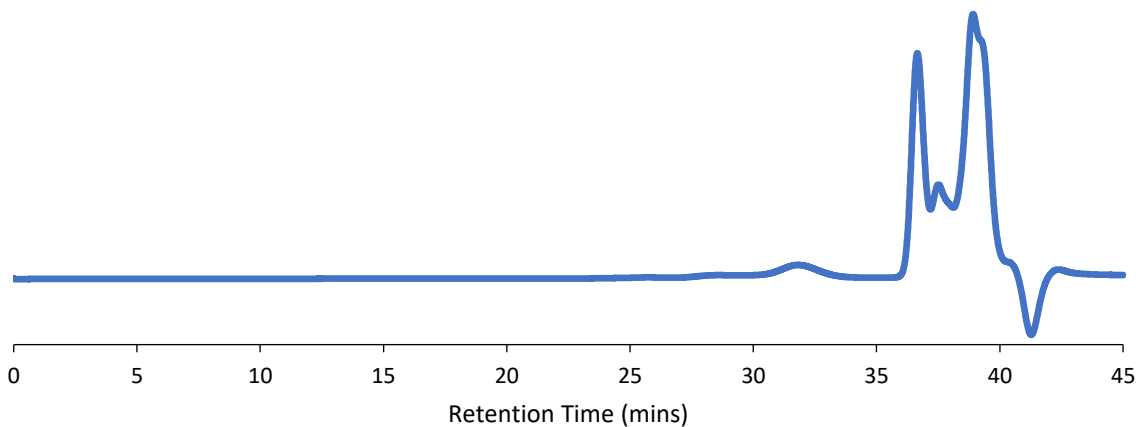

b) GPC-RI of aliquot after 2 mins.  $M_n=3,613$ ,  $D=1.39$ .

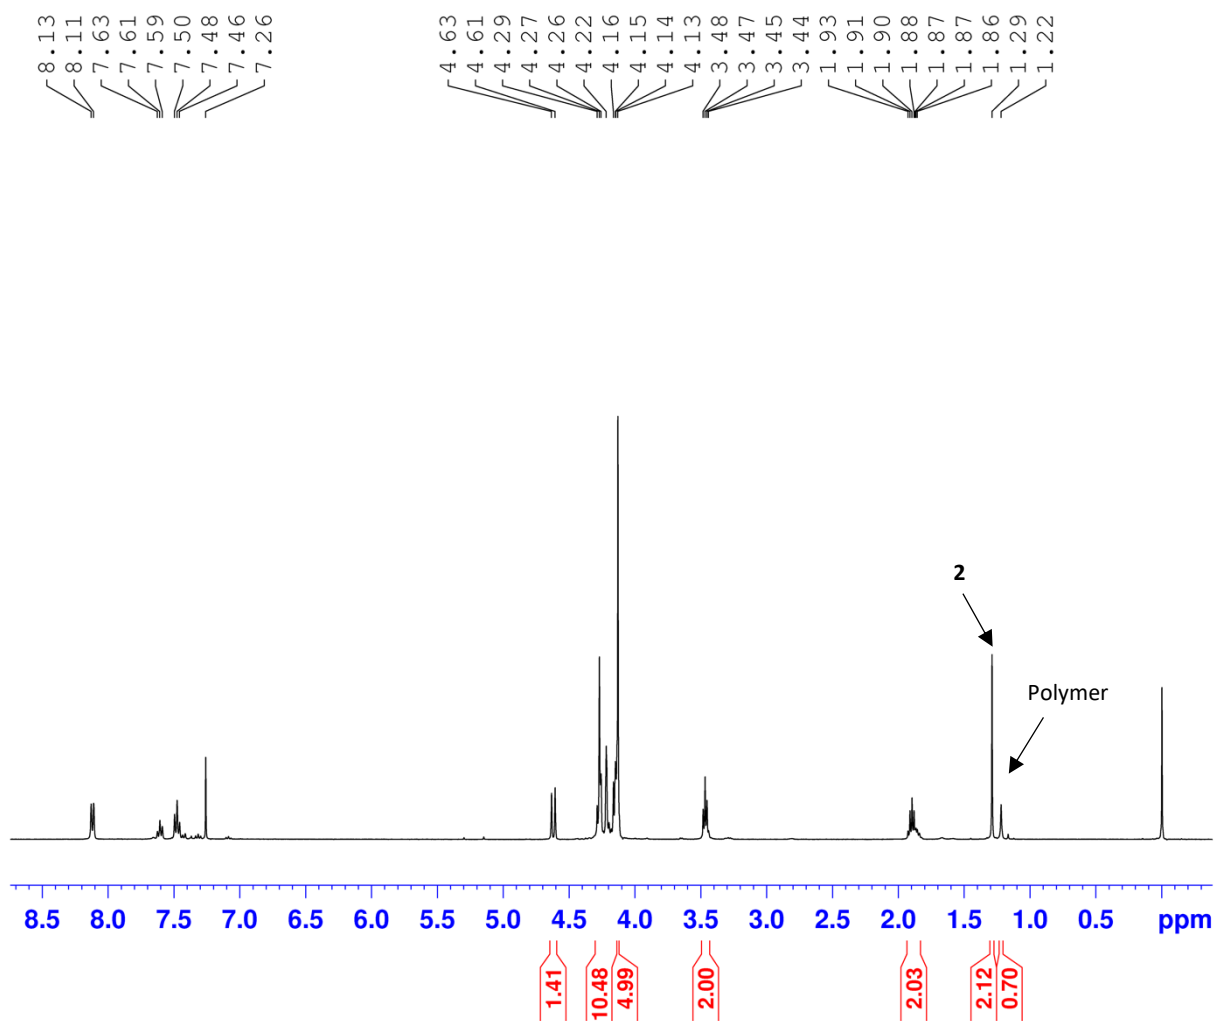

c)  $^1\text{H}$  NMR spectrum ( $\text{CDCl}_3$ ) of aliquot after 4 mins. % Conversion=25%.

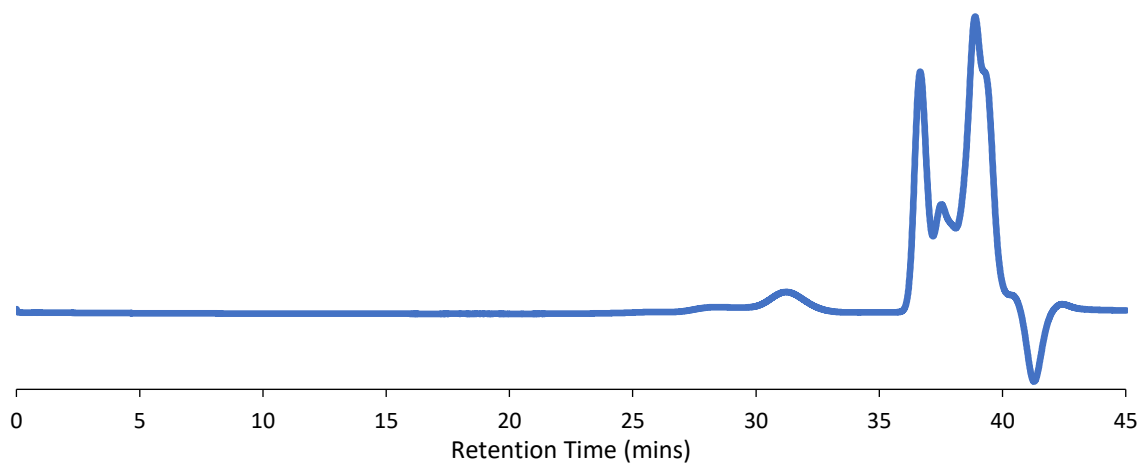

d) GPC-RI of aliquot after 4 mins.  $M_n=4,758$ ,  $D=1.31$ .

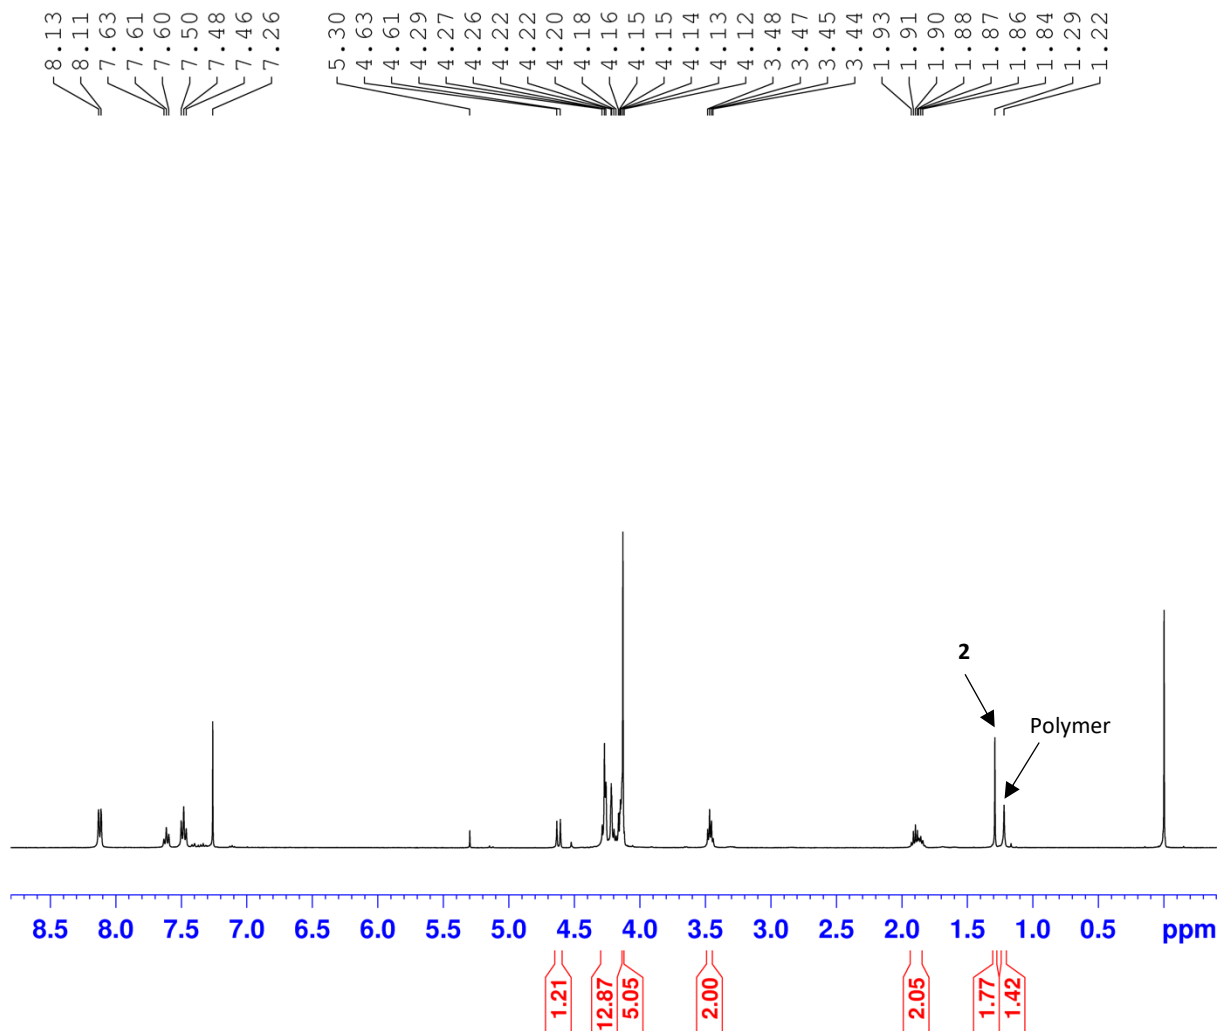

e)  $^1\text{H}$  NMR spectrum ( $\text{CDCl}_3$ ) of aliquot after 6 mins. % Conversion= 45%.

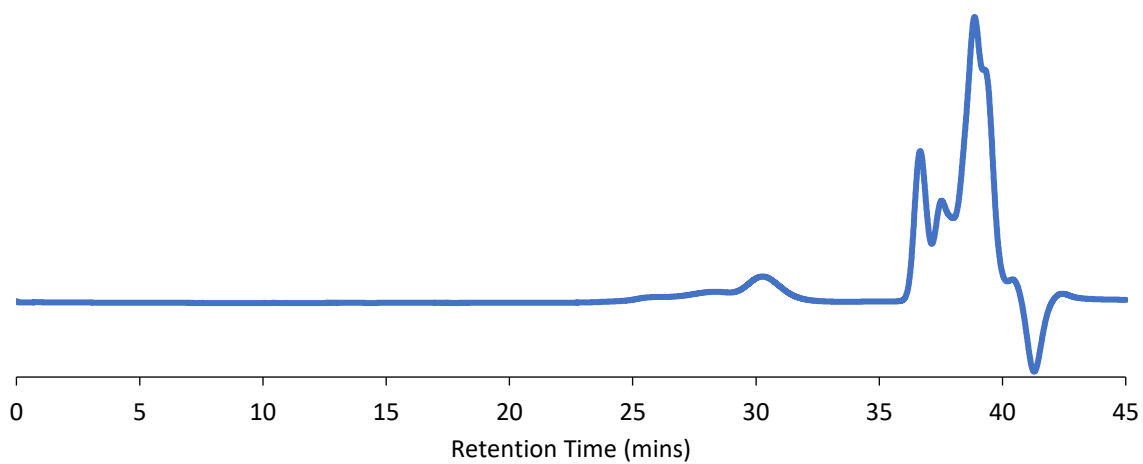

f) GPC-RI of aliquot after 6 mins.  $M_n=8,137$ ,  $D=1.57$ .

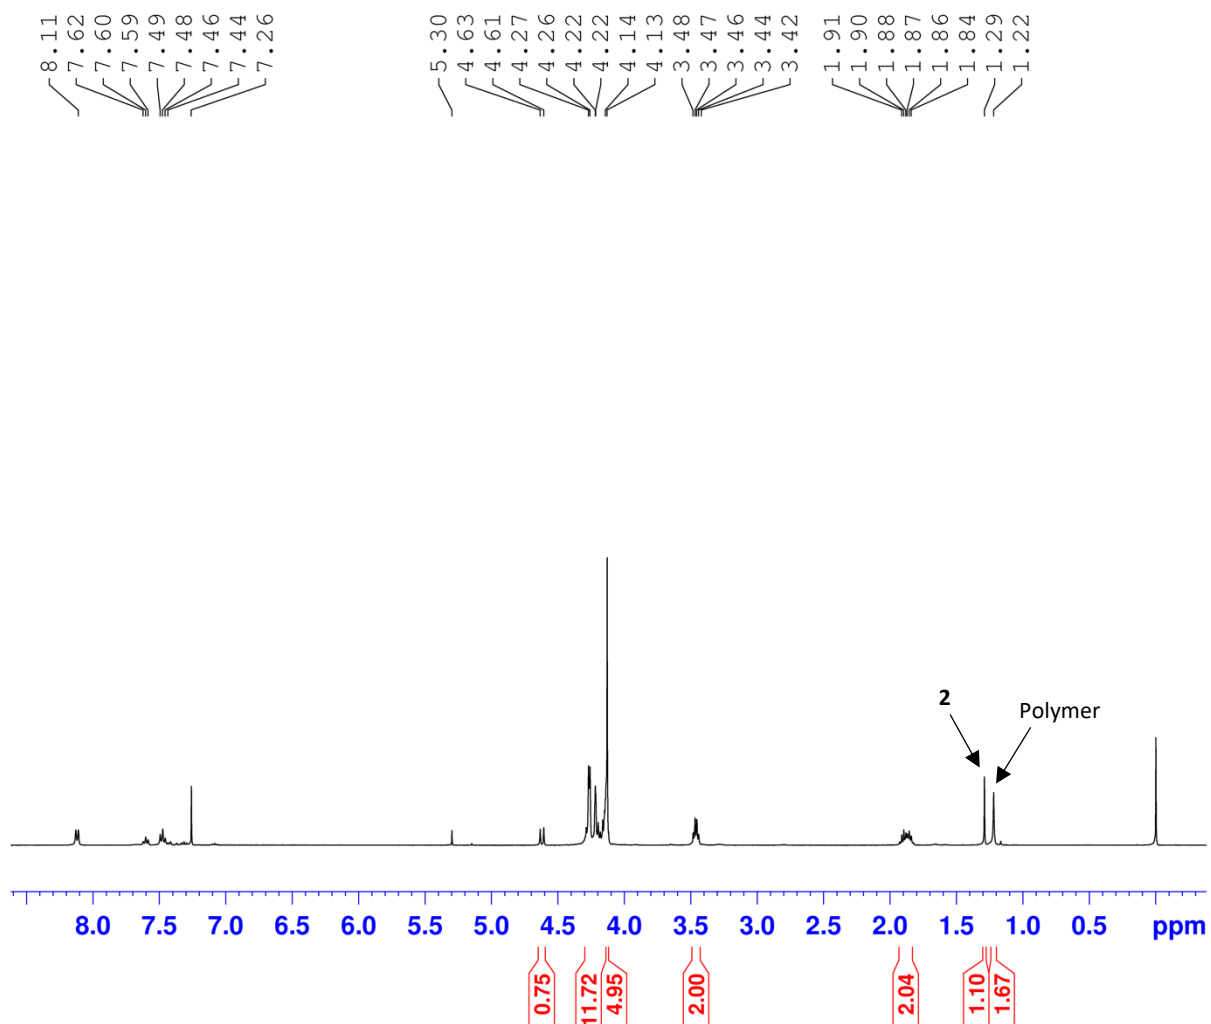

g)  $^1\text{H}$  NMR spectrum ( $\text{CDCl}_3$ ) of aliquot after 8 mins. % Conversion= 60%.

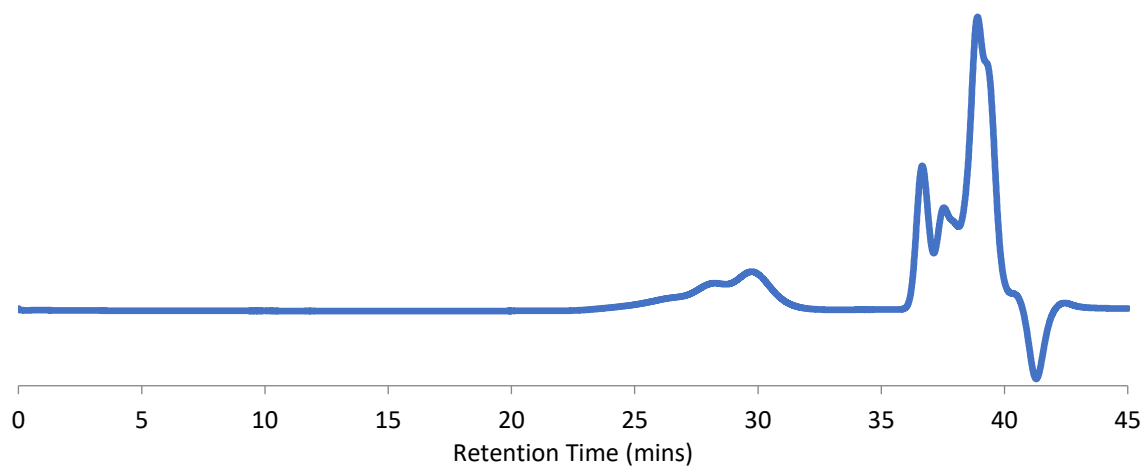

h) GPC-RI of aliquot after 8 mins.  $M_n=10,208$ ,  $D=1.48$ .

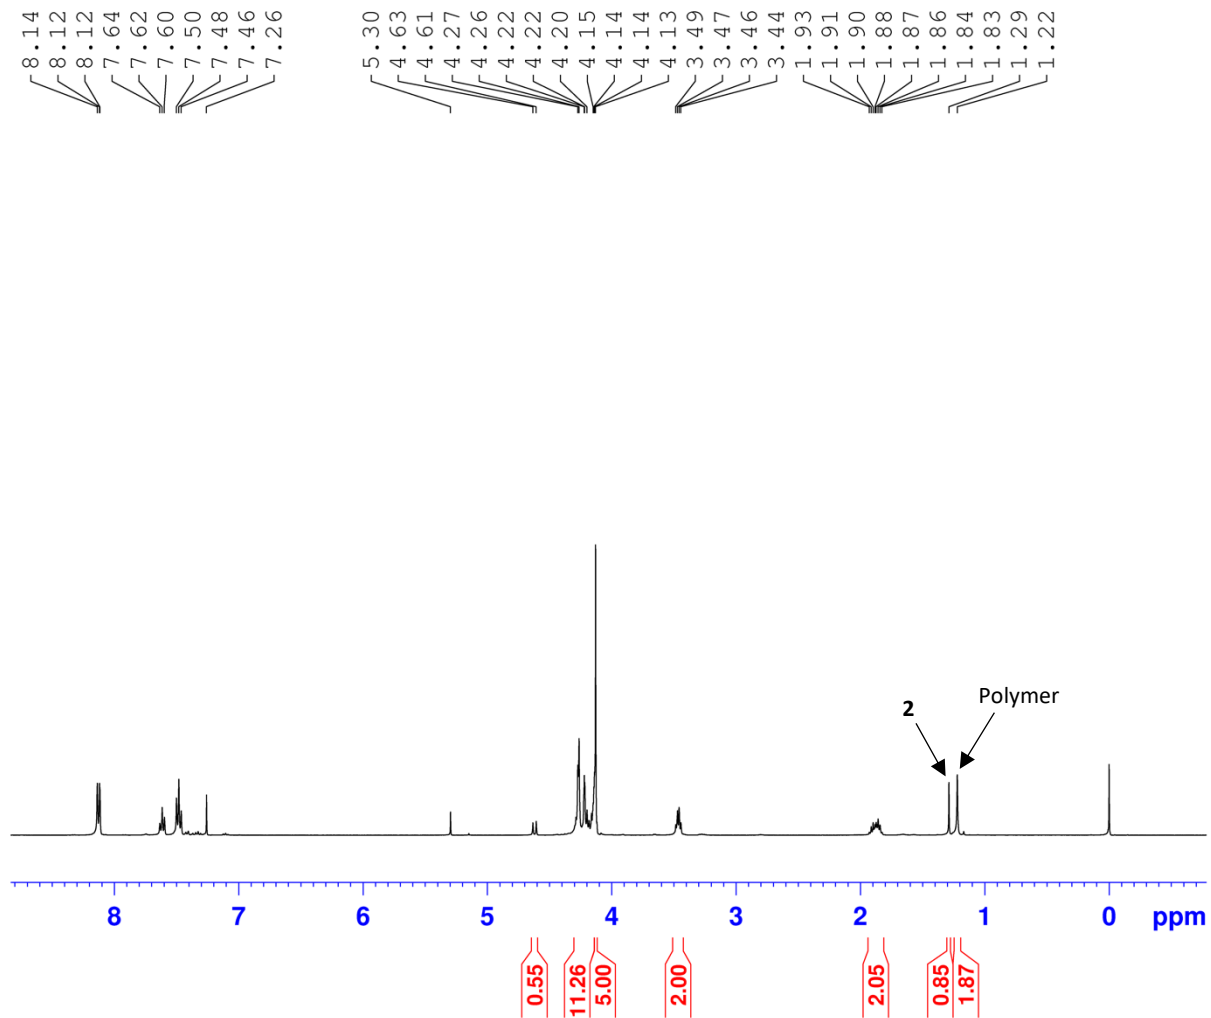

i)  $^1\text{H}$  NMR spectrum ( $\text{CDCl}_3$ ) of aliquot after 10 mins. % Conversion= 69%.

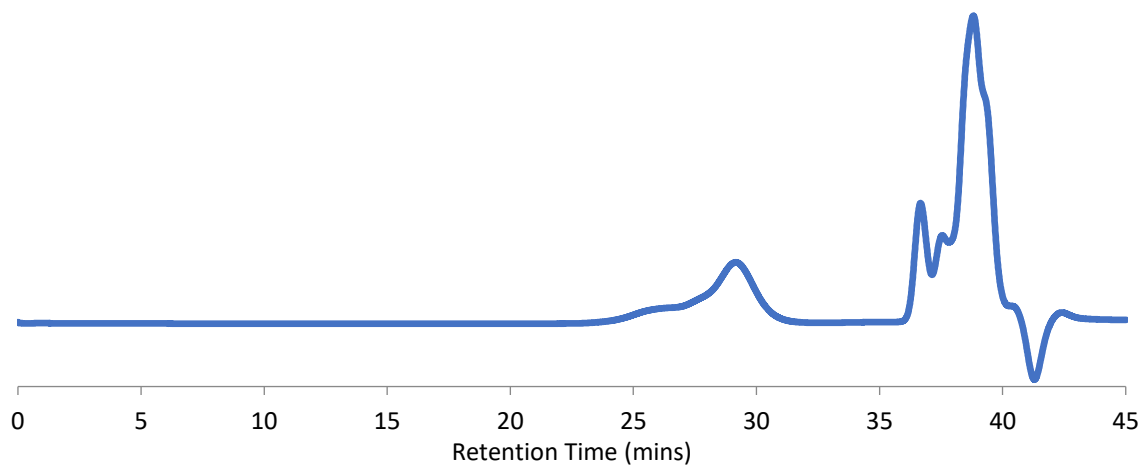

j) GPC-RI of aliquot after 10 mins.  $M_n=11,347$ ,  $D=1.33$ .



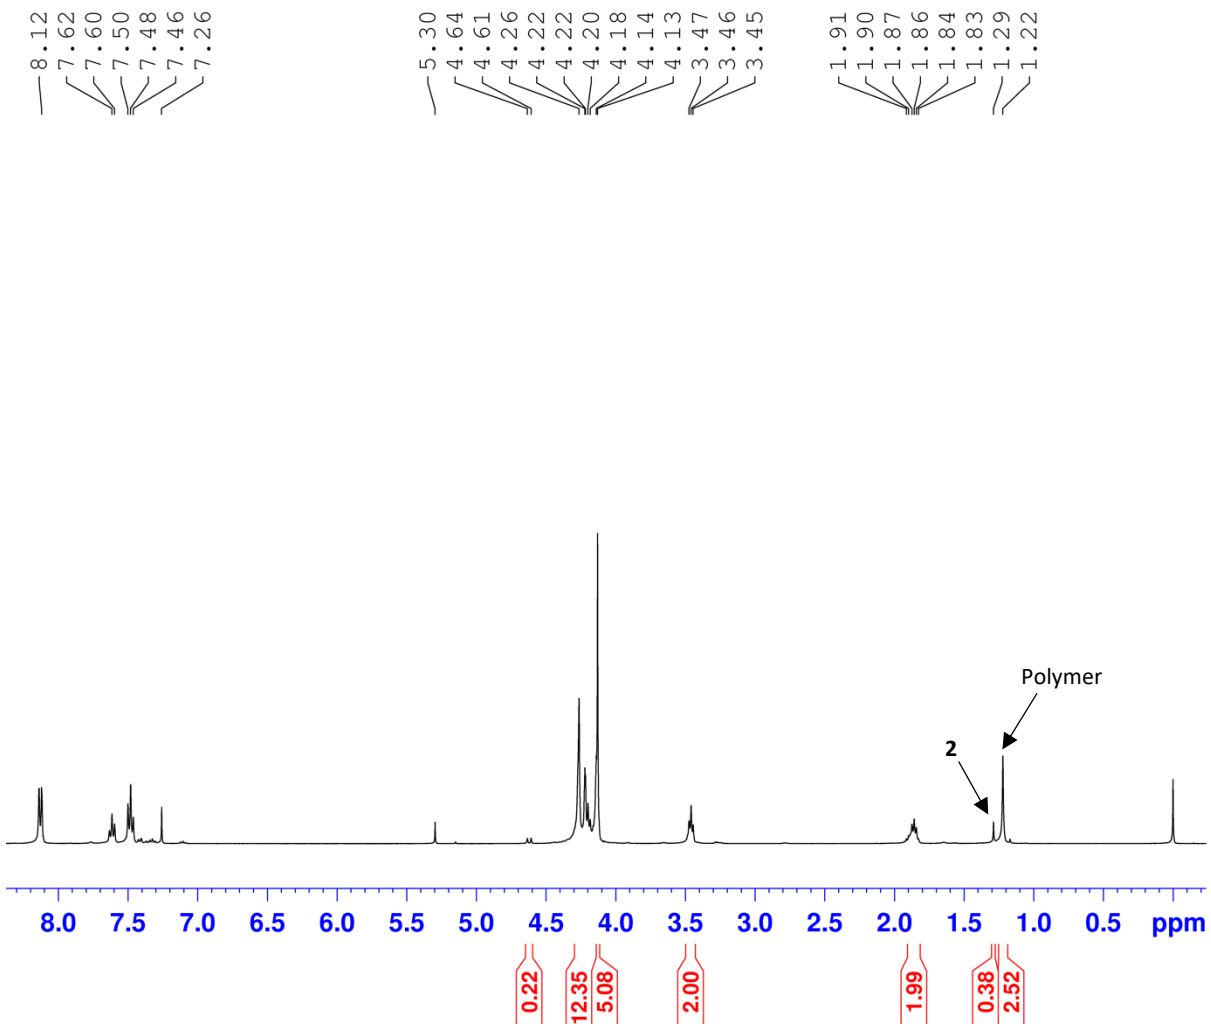

k)  $^1\text{H}$  NMR spectrum ( $\text{CDCl}_3$ ) of aliquot after 15 mins. % Conversion= 87%.

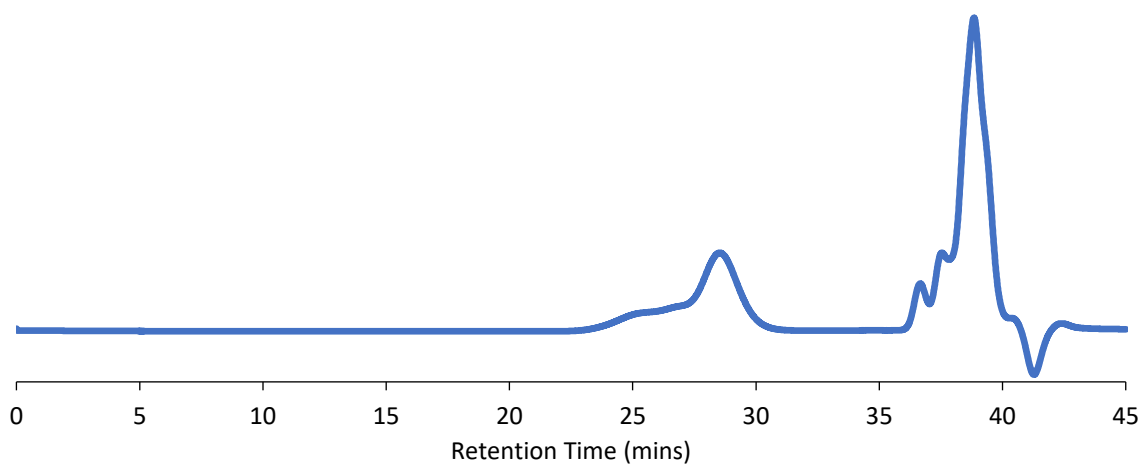

l) GPC-RI of aliquot after 15 mins.  $M_n=14,215$ ,  $D=1.36$ .

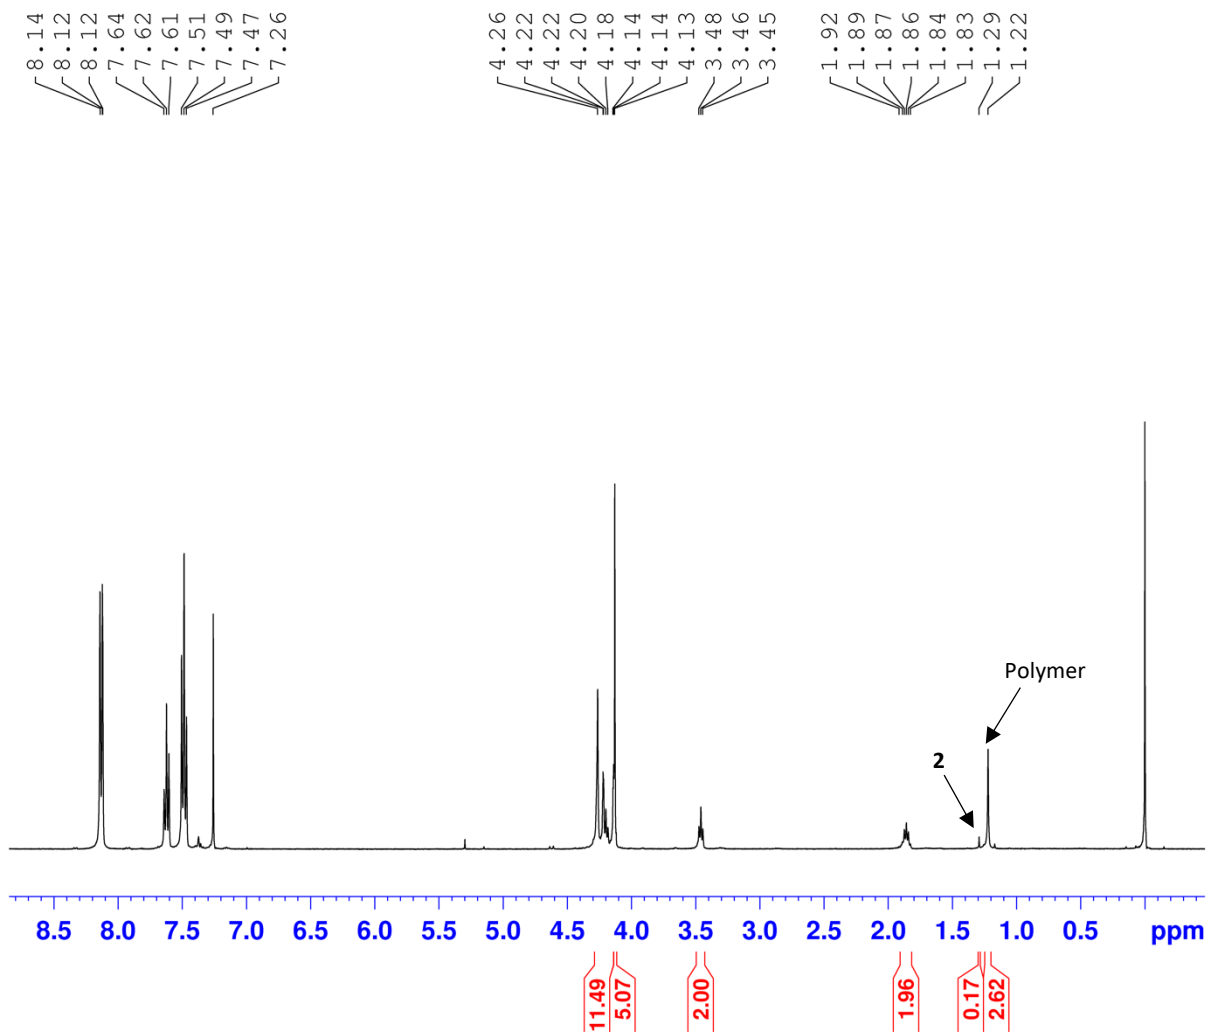

m)  $^1\text{H}$  NMR spectrum ( $\text{CDCl}_3$ ) of aliquot after 20 mins. % Conversion= 94%.

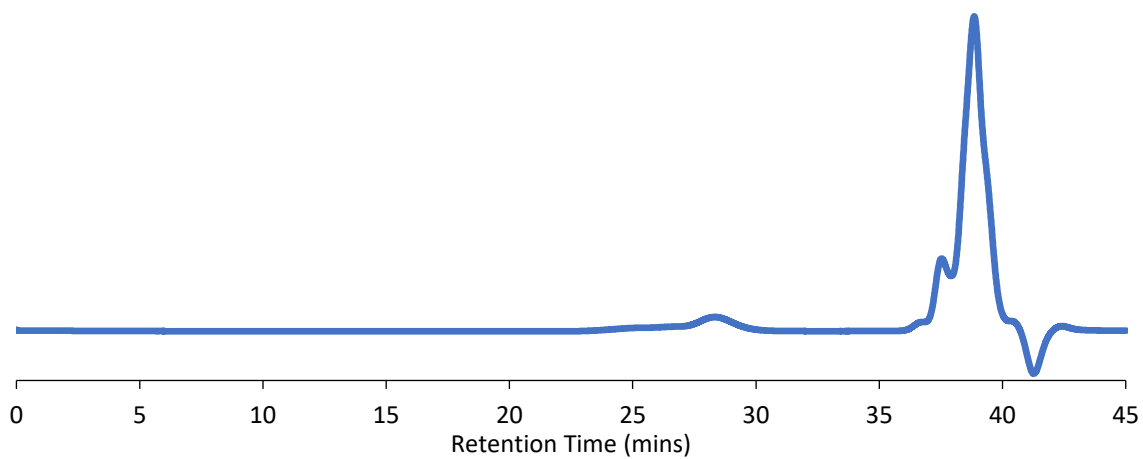

n) GPC-RI of aliquot after 20 mins.  $M_n=15,240$ ,  $D=1.36$ .

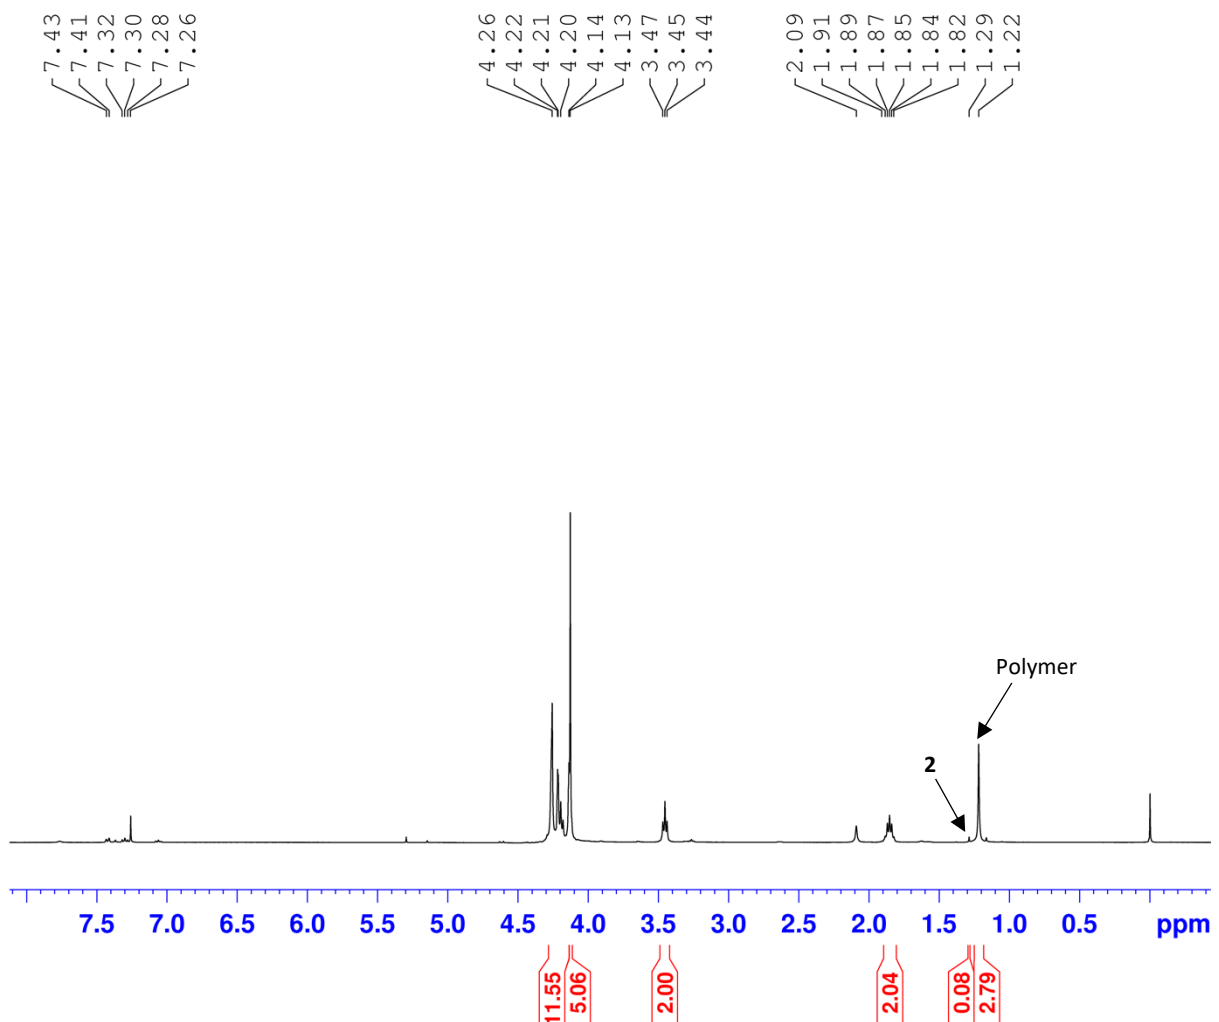

o)  $^1\text{H}$  NMR spectrum ( $\text{CDCl}_3$ ) of aliquot after 30 mins. % Conversion=97%.

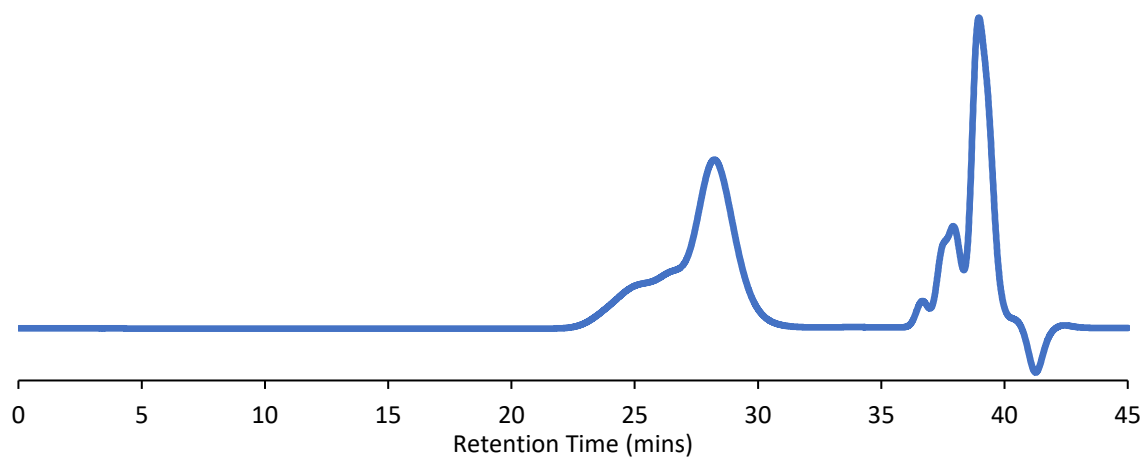

p) GPC-RI of aliquot after 30 mins.  $M_n=15,657$ ,  $D=1.40$ .

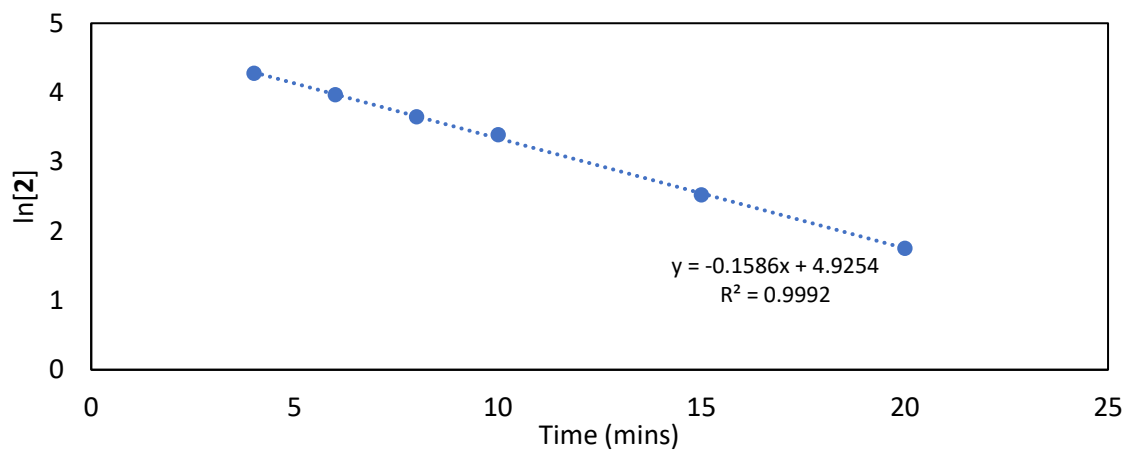

**Figure S50.** First-order plot of ferrocene monomer **2**. The  $\ln[2]$  plotted as a function of time gave a linear plot. The first order dependence on monomer concentration is characteristic of a living polymerization.
